# Supplementary material for: Transitions in cell potency during early mouse development are driven by Notch
Source: eLife journal article supplement (doi:10.7554/elife.42930), 2019-04-08
Supplement: supp [file elife-42930-supp-v1.zip]

Archive with 23 entries (23 files):
- elife_poa_e42930_Figure_6_figure_supplement_3.pdf
- elife_poa_e42930_Figure_5_figure_supplement_1.pdf
- elife_poa_e42930_Transparent_Reporting_File.pdf
- elife_poa_e42930_Figure_3_figure_supplement_1.pdf
- elife_poa_e42930_Figure_6_figure_supplement_2.pdf
- elife_poa_e42930_Video_1.mp4
- elife_poa_e42930_Figure_4_figure_supplement_2.pdf
- elife_poa_e42930_Figure_4_figure_supplement_3.pdf
- elife_poa_e42930_Figure_6_figure_supplement_4.pdf
- elife_poa_e42930_Video_2.mp4
- elife_poa_e42930_Figure_5_source_data_1.xlsx
- elife_poa_e42930_Figure_2_figure_supplement_2.pdf
- elife_poa_e42930_Figure_5_source_data_2.xlsx
- elife_poa_e42930_Figure_4_figure_supplement_1.pdf
- elife_poa_e42930_Supplementry_file_1.docx
- elife_poa_e42930_Figure_2_figure_supplement_1.pdf
- elife_poa_e42930_Figure_3_figure_supplement_2.pdf
- elife_poa_e42930_Figure_1_figure_supplement_4.pdf
- elife_poa_e42930_Figure_1_figure_supplement_2.pdf
- elife_poa_e42930_Figure_6_figure_supplement_1.pdf
- elife_poa_e42930_Figure_1_figure_supplement_1.pdf
- elife_poa_e42930_Figure_5_figure_supplement_2.pdf
- elife_poa_e42930_Figure_1_figure_supplement_3.pdf
