# Supplementary material for: Transitions in cell potency during early mouse development are driven by Notch
Source: eLife journal article supplement (doi:10.7554/elife.42930), 2019-04-08
Supplement: supp [file elife-42930-supp-v1.zip › elife_poa_e42930_Figure_5_figure_supplement_2.pdf]

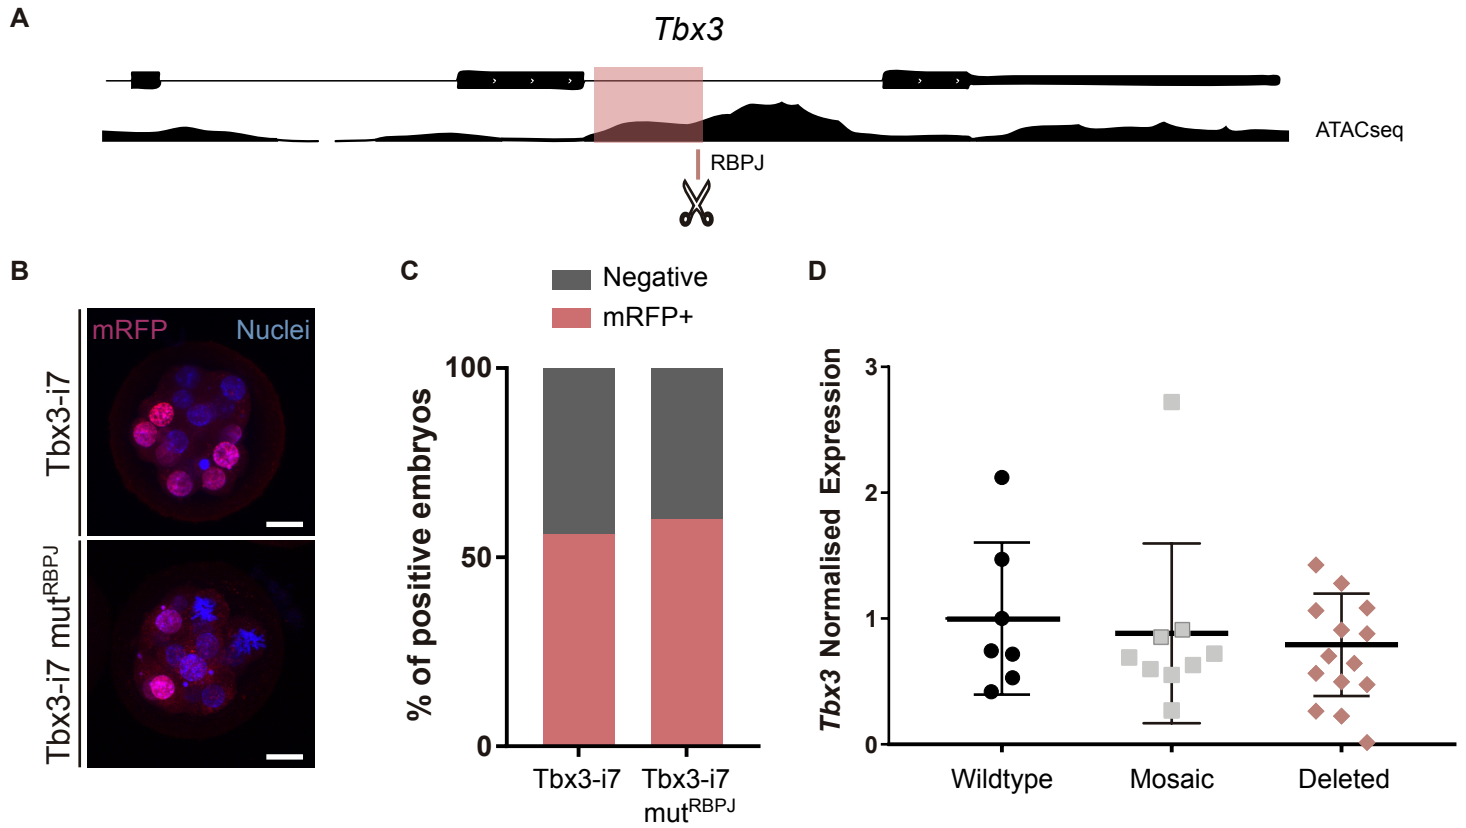

## E Tle4-up deletion

GRCm38/mm10 Chr19: 14,599,249 - 14,599,394

WT TCCCACCTTAAC TCGAAGTGCAGGCTAATACGGTGC TGT TGGTTCAACAAATGT [...] TCCACGACAGAGGAACCGGTAGCTTAATGCCCAATTCAAGGCGTTCTGTGGGCCTCACTAG

#del-1 TCCCACCTTAA-----TGTGGGCCTCACTAG

#del-2 TCCCACCT-----CACTAG

## F Tbx3-i7 deletion

GRCm38/mm10 Chr 5: 119,681,588 - 119,681,899

|               |                                                                                                                                                   |
|---------------|---------------------------------------------------------------------------------------------------------------------------------------------------|
| <b>WT</b>     | TTCAAAGCCTTTCTCTCCACCCGACTCCCAAACAGCCCAGCCTATCTCTAAAGGGTTAATGGG [...] AACCCAGTAGGAACCTCTCTGGTATTTTTTTCTGGCCTACTCCGACCTTTTGTTTTGTCTGAGCATATTCATCTC |
| <b>#del-1</b> | TTCAAAGCCTTTCTCTCCACCCGACTCCCAAAC-----CTCTCTGGTATTTTTTTCTGGCCTACTCCGACCTTTTGTTTTGTCTGAGCATATTCATCTC                                               |
| <b>#del-2</b> | TTCA-----TCTC                                                                                                                                     |
| <b>#del-3</b> | TTCAAAGCCTTTCTCTCCACCCGACTCCCAAACAGCCAGC-----AGGAACCTCTCTGGTATTTTTTTCTGGCCTACTCCGACCTTTTGTTTTGTCTGAGCATATTCATCTC                                  |
