# Supplementary material for: Transitions in cell potency during early mouse development are driven by Notch
Source: eLife journal article supplement (doi:10.7554/elife.42930), 2019-04-08
Supplement: supp [file elife-42930-supp-v1.zip › elife_poa_e42930_Figure_5_source_data_1.xlsx]

## Sheet: Hoja1
ensembl_gene_id	mgi_symbol	ave_KO	ave_WT	logFC	adj.P.Val	description
ENSMUSG00000093445	Lrch4	3.60784	62.421	-12.876	3.29797e-15	leucine-rich repeats and calponin homology (CH) domain containing 4 [Source:MGI Symbol;Acc:MGI:1917193]
ENSMUSG00000037827	Gm5884	15.6863	33.8797	-11.995	2.32401e-11	predicted pseudogene 5884 [Source:MGI Symbol;Acc:MGI:3644646]
ENSMUSG00000044065	Gm9788	0	31.7659	-11.9016	1.24952e-08	predicted pseudogene 9788 [Source:MGI Symbol;Acc:MGI:3704496]
ENSMUSG00000081272	Gm13509	10.4784	27.1317	-11.6745	1.76971e-09	predicted gene 13509 [Source:MGI Symbol;Acc:MGI:3649640]
ENSMUSG00000038560	Sp6	6.80784	24.7008	-11.5393	8.16344e-08	trans-acting transcription factor 6 [Source:MGI Symbol;Acc:MGI:1932575]
ENSMUSG00000024978	Gpam	2.66667	22.0789	-11.3774	8.9833e-07	glycerol-3-phosphate acyltransferase, mitochondrial [Source:MGI Symbol;Acc:MGI:109162]
ENSMUSG00000100454		15.7992	0	11.3763	6.50706e-07
ENSMUSG00000025270	Alas2	30.2431	19.6844	-11.212	0.000185031	aminolevulinic acid synthase 2, erythroid [Source:MGI Symbol;Acc:MGI:87990]
ENSMUSG00000009941	Nxf2	2.13333	19.4665	-11.1955	4.33707e-06	nuclear RNA export factor 2 [Source:MGI Symbol;Acc:MGI:1933192]
ENSMUSG00000055745	Ldoc1l	4.17255	18.4678	-11.1201	1.22743e-05	leucine zipper, down-regulated in cancer 1-like [Source:MGI Symbol;Acc:MGI:2675858]
ENSMUSG00000020865	Abcc3	13.0196	17.6263	-11.0521	4.23466e-07	ATP-binding cassette, sub-family C (CFTR/MRP), member 3 [Source:MGI Symbol;Acc:MGI:1923658]
ENSMUSG00000075592	Nynrin	13.9922	17.3844	-11.0325	3.57825e-07	NYN domain and retroviral integrase containing [Source:MGI Symbol;Acc:MGI:2652872]
ENSMUSG00000067813	Xkr9	0.752941	15.6647	-10.8827	0.000295694	X Kell blood group precursor related family member 9 homolog [Source:MGI Symbol;Acc:MGI:2686466]
ENSMUSG00000036661	Dennd3	0.0941176	14.4754	-10.7684	0.000144806	DENN/MADD domain containing 3 [Source:MGI Symbol;Acc:MGI:2146009]
ENSMUSG00000014039	Prdm15	0.0941176	12.5233	-10.5595	0.000720911	PR domain containing 15 [Source:MGI Symbol;Acc:MGI:1930121]
ENSMUSG00000058883	Zfp708	0	11.7506	-10.4676	0.000607817	zinc finger protein 708 [Source:MGI Symbol;Acc:MGI:3040674]
ENSMUSG00000033715	Akr1c14	4.26666	11.1218	-10.388	0.00293781	aldo-keto reductase family 1, member C14 [Source:MGI Symbol;Acc:MGI:2145458]
ENSMUSG00000045466	Zfp956	2.82353	11.0494	-10.3794	0.000437105	zinc finger protein 956 [Source:MGI Symbol;Acc:MGI:2141515]
ENSMUSG00000039621	Prex1	5.92941	10.0147	-10.2371	0.000240474	phosphatidylinositol-3,4,5-trisphosphate-dependent Rac exchange factor 1 [Source:MGI Symbol;Acc:MGI:3040696]
ENSMUSG00000026737	Pip4k2a	10.4784	9.97406	-10.2313	6.00469e-05	phosphatidylinositol-5-phosphate 4-kinase, type II, alpha [Source:MGI Symbol;Acc:MGI:1298206]
ENSMUSG00000038718	Pbx3	1.44314	9.43883	-10.1522	0.00156955	pre B cell leukemia homeobox 3 [Source:MGI Symbol;Acc:MGI:97496]
ENSMUSG00000074994	Qser1	2.47843	9.17167	-10.111	0.00127773	glutamine and serine rich 1 [Source:MGI Symbol;Acc:MGI:2138986]
ENSMUSG00000062590	Armc9	6.21176	8.51903	-10.0049	0.00144354	armadillo repeat containing 9 [Source:MGI Symbol;Acc:MGI:1926045]
ENSMUSG00000025665	Rps6ka6	0.0313725	8.0542	-9.92291	0.00562402	ribosomal protein S6 kinase polypeptide 6 [Source:MGI Symbol;Acc:MGI:1914321]
ENSMUSG00000072944	Nup62cl	1.69412	7.98857	-9.91202	0.0105769	nucleoporin 62 C-terminal like [Source:MGI Symbol;Acc:MGI:2685565]
ENSMUSG00000030123	Plxnd1	0.564706	7.75856	-9.86938	0.00748504	plexin D1 [Source:MGI Symbol;Acc:MGI:2154244]
ENSMUSG00000031075	Ano1	4.1098	7.57223	-9.83403	0.00794784	anoctamin 1, calcium activated chloride channel [Source:MGI Symbol;Acc:MGI:2142149]
ENSMUSG00000055932	Fto	5.67843	7.38514	-9.79804	0.00133997	fat mass and obesity associated [Source:MGI Symbol;Acc:MGI:1347093]
ENSMUSG00000019845	Tube1	0	7.26684	-9.7748	0.0076328	epsilon-tubulin 1 [Source:MGI Symbol;Acc:MGI:1919174]
ENSMUSG00000066152	Slc31a2	1.9451	7.18988	-9.75997	0.00636077	solute carrier family 31, member 2 [Source:MGI Symbol;Acc:MGI:1333844]
ENSMUSG00000040447	Spns2	3.60784	7.05526	-9.73286	0.00473436	spinster homolog 2 [Source:MGI Symbol;Acc:MGI:2384936]
ENSMUSG00000096980	Gm26526	1.28627	6.92176	-9.70442	0.00687232	predicted gene, 26526 [Source:MGI Symbol;Acc:MGI:5477020]
ENSMUSG00000085627	Gm11222	6.86048	0	9.6624	0.000244785	predicted gene 11222 [Source:MGI Symbol;Acc:MGI:3651632]
ENSMUSG00000062743	Zfp677	3.70196	6.6923	-9.65669	0.00640863	zinc finger protein 677 [Source:MGI Symbol;Acc:MGI:3053207]
ENSMUSG00000028453	Fancg	4.58039	6.35586	-9.58264	0.00381111	Fanconi anemia, complementation group G [Source:MGI Symbol;Acc:MGI:1926471]
ENSMUSG00000019726	Lyst	0	6.35224	-9.58112	0.0102727	lysosomal trafficking regulator [Source:MGI Symbol;Acc:MGI:107448]
ENSMUSG00000021279	Cdc42bpb	1.63137	6.31254	-9.57182	0.00868583	CDC42 binding protein kinase beta [Source:MGI Symbol;Acc:MGI:2136459]
ENSMUSG00000094365	Gm21982	1.88235	6.3048	-9.57025	0.00831451	predicted gene 21982 [Source:MGI Symbol;Acc:MGI:5439451]
ENSMUSG00000033389	Arhgap44	3.04314	6.28805	-9.56671	0.00504745	Rho GTPase activating protein 44 [Source:MGI Symbol;Acc:MGI:2144423]
ENSMUSG00000062275	Fbxw24	0	6.08959	-9.52059	0.0114511	F-box and WD-40 domain protein 24 [Source:MGI Symbol;Acc:MGI:3646659]
ENSMUSG00000043782	Ccdc64b	1.19216	6.0313	-9.5072	0.0139309	coiled-coil domain containing 64B [Source:MGI Symbol;Acc:MGI:2388267]
ENSMUSG00000006567	Atp7b	0.878431	6.0292	-9.50529	0.0234599	ATPase, Cu++ transporting, beta polypeptide [Source:MGI Symbol;Acc:MGI:103297]
ENSMUSG00000097599	Gm26678	3.10588	5.95189	-9.48752	0.00596313	predicted gene, 26678 [Source:MGI Symbol;Acc:MGI:5477172]
ENSMUSG00000059013	Sh2d3c	4.26666	5.89388	-9.4738	0.00481518	SH2 domain containing 3C [Source:MGI Symbol;Acc:MGI:1351631]
ENSMUSG00000022375	Lrrc6	5.60865	0	9.45028	0.000573409	leucine rich repeat containing 6 (testis) [Source:MGI Symbol;Acc:MGI:1859553]
ENSMUSG00000020396	Nefh	3.63921	5.77895	-9.44483	0.00662919	neurofilament, heavy polypeptide [Source:MGI Symbol;Acc:MGI:97309]
ENSMUSG00000020919	Stat5b	1.72549	5.71069	-9.4277	0.0209965	signal transducer and activator of transcription 5B [Source:MGI Symbol;Acc:MGI:103035]
ENSMUSG00000006587	Snai3	2.13333	5.67705	-9.41967	0.0217757	snail homolog 3 (Drosophila) [Source:MGI Symbol;Acc:MGI:1353563]
ENSMUSG00000039043	2610034B18Rik	0	5.53429	-9.3827	0.0151701	RIKEN cDNA 2610034B18 gene [Source:MGI Symbol;Acc:MGI:1917670]
ENSMUSG00000056116	H2-T22	1.06667	5.46079	-9.36369	0.0119871	histocompatibility 2, T region locus 22 [Source:MGI Symbol;Acc:MGI:95956]
ENSMUSG00000049287	Iba57	0.972549	5.45833	-9.3622	0.0216468	IBA57, iron-sulfur cluster assembly homolog (S. cerevisiae) [Source:MGI Symbol;Acc:MGI:3041174]
ENSMUSG00000024782	Ak3	7.78039	5.44538	-9.35978	0.00483696	adenylate kinase 3 [Source:MGI Symbol;Acc:MGI:1860835]
ENSMUSG00000045917	6330416G13Rik	2.13333	5.24629	-9.30561	0.0231441	RIKEN cDNA 6330416G13 gene [Source:MGI Symbol;Acc:MGI:1913920]
ENSMUSG00000041000	Trim62	0.941176	5.15943	-9.28136	0.0155512	tripartite motif-containing 62 [Source:MGI Symbol;Acc:MGI:1914775]
ENSMUSG00000034538	Zfp418	0	5.13612	-9.27516	0.0168051	zinc finger protein 418 [Source:MGI Symbol;Acc:MGI:2444763]
ENSMUSG00000042046	Dstyk	0.156863	5.11659	-9.26966	0.0162437	dual serine/threonine and tyrosine protein kinase [Source:MGI Symbol;Acc:MGI:1925064]
ENSMUSG00000059674	Cdh24	0.188235	5.10974	-9.26775	0.0161161	cadherin-like 24 [Source:MGI Symbol;Acc:MGI:1928330]
ENSMUSG00000039294	BC017643	1.75686	5.08707	-9.26108	0.0126034	cDNA sequence BC017643 [Source:MGI Symbol;Acc:MGI:2384959]
ENSMUSG00000079363	Gbp4	1.38039	5.07443	-9.25772	0.0134418	guanylate binding protein 4 [Source:MGI Symbol;Acc:MGI:97072]
ENSMUSG00000034825	Nrip3	2.69804	5.05547	-9.25304	0.0228657	nuclear receptor interacting protein 3 [Source:MGI Symbol;Acc:MGI:1925843]
ENSMUSG00000053769	Lysmd1	1.28627	4.91659	-9.21273	0.01577	LysM, putative peptidoglycan-binding, domain containing 1 [Source:MGI Symbol;Acc:MGI:1919409]
ENSMUSG00000046605	B3gntl1	0	4.8296	-9.18704	0.0208422	UDP-GlcNAc:betaGal beta-1,3-N-acetylglucosaminyltransferase-like 1 [Source:MGI Symbol;Acc:MGI:2441705]
ENSMUSG00000038605	Samd10	1.78823	4.80552	-9.17956	0.0290621	sterile alpha motif domain containing 10 [Source:MGI Symbol;Acc:MGI:2443872]
ENSMUSG00000038598	AI481877	0.345098	4.70721	-9.14907	0.0212246	expressed sequence AI481877 [Source:MGI Symbol;Acc:MGI:2140313]
ENSMUSG00000072647	Adam1a	0	4.65842	-9.13477	0.0234318	a disintegrin and metallopeptidase domain 1a [Source:MGI Symbol;Acc:MGI:2429504]
ENSMUSG00000030302	Atp2b2	0.0313725	4.61736	-9.12111	0.0229231	ATPase, Ca++ transporting, plasma membrane 2 [Source:MGI Symbol;Acc:MGI:105368]
ENSMUSG00000048550	Thnsl1	3.73333	4.44164	-9.0663	0.0122269	threonine synthase-like 1 (bacterial) [Source:MGI Symbol;Acc:MGI:2139347]
ENSMUSG00000052135	Foxo6	0.37647	4.44057	-9.06578	0.0214807	forkhead box O6 [Source:MGI Symbol;Acc:MGI:2676586]
ENSMUSG00000021678	F2rl1	0.721568	4.43749	-9.06439	0.0242689	coagulation factor II (thrombin) receptor-like 1 [Source:MGI Symbol;Acc:MGI:101910]
ENSMUSG00000078484	Klhl17	0	4.43567	-9.06332	0.0238397	kelch-like 17 [Source:MGI Symbol;Acc:MGI:2678948]
ENSMUSG00000038058	Nod1	2.16471	4.36316	-9.04099	0.0311445	nucleotide-binding oligomerization domain containing 1 [Source:MGI Symbol;Acc:MGI:1341839]
ENSMUSG00000003134	Tbc1d8	0.596078	4.34532	-9.03468	0.0404869	TBC1 domain family, member 8 [Source:MGI Symbol;Acc:MGI:1927225]
ENSMUSG00000026121	Sema4c	0.815686	4.34685	-9.03374	0.029662	sema domain, immunoglobulin domain (Ig), transmembrane domain (TM) and short cytoplasmic domain, (semaphorin) 4C [Source:MGI Symbol;Acc:MGI:109252]
ENSMUSG00000041180	Hectd2	1.6	4.20006	-8.98496	0.0352433	HECT domain containing 2 [Source:MGI Symbol;Acc:MGI:2442663]
ENSMUSG00000009731	Kcnd1	0.0313725	4.17125	-8.97509	0.025103	potassium voltage-gated channel, Shal-related family, member 1 [Source:MGI Symbol;Acc:MGI:96671]
ENSMUSG00000079429	Mroh2a	0.533333	4.16892	-8.9744	0.0230307	maestro heat-like repeat family member 2A [Source:MGI Symbol;Acc:MGI:3705228]
ENSMUSG00000017897	Eya2	5.7098	4.13926	-8.96395	0.0148775	eyes absent 2 homolog (Drosophila) [Source:MGI Symbol;Acc:MGI:109341]
ENSMUSG00000025383	Il23a	5.05098	4.13049	-8.96183	0.0251402	interleukin 23, alpha subunit p19 [Source:MGI Symbol;Acc:MGI:1932410]
ENSMUSG00000022583	Ly6f	0	4.11507	-8.95607	0.0247781	lymphocyte antigen 6 complex, locus F [Source:MGI Symbol;Acc:MGI:109441]
ENSMUSG00000026308	Klhl30	1.22353	4.0856	-8.94504	0.0242753	kelch-like 30 [Source:MGI Symbol;Acc:MGI:1918038]
ENSMUSG00000045691	Thtpa	1.28627	4.04636	-8.93131	0.0387188	thiamine triphosphatase [Source:MGI Symbol;Acc:MGI:2446078]
ENSMUSG00000028581	Laptm5	0.564706	3.99298	-8.91306	0.0454143	lysosomal-associated protein transmembrane 5 [Source:MGI Symbol;Acc:MGI:108046]
ENSMUSG00000032623	Oas1d	2.03921	3.89165	-8.87639	0.037941	2'-5' oligoadenylate synthetase 1D [Source:MGI Symbol;Acc:MGI:2140770]
ENSMUSG00000025231	Sufu	2.03921	3.81986	-8.84863	0.0386986	suppressor of fused homolog (Drosophila) [Source:MGI Symbol;Acc:MGI:1345643]
ENSMUSG00000025743	Sdc3	0	3.80049	-8.84215	0.0308697	syndecan 3 [Source:MGI Symbol;Acc:MGI:1349163]
ENSMUSG00000034449	Dhrs11	3.57647	3.79321	-8.83832	0.0171501	dehydrogenase/reductase (SDR family) member 11 [Source:MGI Symbol;Acc:MGI:2652816]
ENSMUSG00000039347	Atp6v0e2	0.909804	3.76276	-8.82682	0.0262463	ATPase, H+ transporting, lysosomal V0 subunit E2 [Source:MGI Symbol;Acc:MGI:1923502]
ENSMUSG00000036377	C530008M17Rik	0.596078	3.72506	-8.81278	0.0467563	RIKEN cDNA C530008M17 gene [Source:MGI Symbol;Acc:MGI:2444817]
ENSMUSG00000097375	6720427I07Rik	0	3.70147	-8.80382	0.0300682	RIKEN cDNA 6720427I07 gene [Source:MGI Symbol;Acc:MGI:1924398]
ENSMUSG00000031993	Snx19	8.50196	3.68305	-8.79521	0.0144141	sorting nexin 19 [Source:MGI Symbol;Acc:MGI:1921581]
ENSMUSG00000051495	Irf2bp2	1.75686	3.67947	-8.79512	0.0256056	interferon regulatory factor 2 binding protein 2 [Source:MGI Symbol;Acc:MGI:2443921]
ENSMUSG00000042834	Nrep	3.5451	3.64089	-8.77991	0.0256056	neuronal regeneration related protein [Source:MGI Symbol;Acc:MGI:99444]
ENSMUSG00000022022	Mtrf1	1.00392	3.63739	-8.77909	0.0302894	mitochondrial translational release factor 1 [Source:MGI Symbol;Acc:MGI:2384815]
ENSMUSG00000032417	Rwdd2a	0	3.5851	-8.75772	0.0299149	RWD domain containing 2A [Source:MGI Symbol;Acc:MGI:1916769]
ENSMUSG00000026301	Iqca	1.09804	3.56713	-8.75111	0.0370247	IQ motif containing with AAA domain [Source:MGI Symbol;Acc:MGI:1922168]
ENSMUSG00000098905	Zfp953	4.20392	3.56772	-8.74885	0.023339	zinc finger protein 953 [Source:MGI Symbol;Acc:MGI:3612873]
ENSMUSG00000050295	Foxc1	0.564706	3.5575	-8.74707	0.0314632	forkhead box C1 [Source:MGI Symbol;Acc:MGI:1347466]
ENSMUSG00000027358	Bmp2	0	3.54093	-8.74017	0.0314698	bone morphogenetic protein 2 [Source:MGI Symbol;Acc:MGI:88177]
ENSMUSG00000018566	Slc2a4	0	3.51836	-8.73005	0.0312387	solute carrier family 2 (facilitated glucose transporter), member 4 [Source:MGI Symbol;Acc:MGI:95758]
ENSMUSG00000046470	Sox18	1.22353	3.50137	-8.72398	0.0295069	SRY (sex determining region Y)-box 18 [Source:MGI Symbol;Acc:MGI:103559]
ENSMUSG00000025409	Mbd6	0.12549	3.39486	-8.6788	0.0318011	methyl-CpG binding domain protein 6 [Source:MGI Symbol;Acc:MGI:106378]
ENSMUSG00000083626	Gm4459	1.31765	3.39065	-8.67789	0.0309776	predicted gene 4459 [Source:MGI Symbol;Acc:MGI:3782643]
ENSMUSG00000027955	Fam198b	1.34902	3.36217	-8.666	0.0413453	family with sequence similarity 198, member B [Source:MGI Symbol;Acc:MGI:1915909]
ENSMUSG00000021483	Cdk20	0.501961	3.27541	-8.62779	0.0320955	cyclin-dependent kinase 20 [Source:MGI Symbol;Acc:MGI:2145349]
ENSMUSG00000068923	Syt11	1.63137	3.25394	-8.61845	0.0394209	synaptotagmin XI [Source:MGI Symbol;Acc:MGI:1859547]
ENSMUSG00000071176	Arhgef10	0.156863	3.24558	-8.61363	0.0369694	Rho guanine nucleotide exchange factor (GEF) 10 [Source:MGI Symbol;Acc:MGI:2444453]
ENSMUSG00000030087	Klf15	2.25882	3.23627	-8.60894	0.0415734	Kruppel-like factor 15 [Source:MGI Symbol;Acc:MGI:1929988]
ENSMUSG00000089951	Gm14435	1.00392	3.22605	-8.60597	0.0328776	predicted gene 14435 [Source:MGI Symbol;Acc:MGI:3702420]
ENSMUSG00000021338	Lrrc16a	14.5569	3.21147	-8.59745	0.00677307	leucine rich repeat containing 16A [Source:MGI Symbol;Acc:MGI:1915982]
ENSMUSG00000001156	Mxd1	0.0627451	3.17427	-8.58273	0.0361979	MAX dimerization protein 1 [Source:MGI Symbol;Acc:MGI:96908]
ENSMUSG00000006205	Htra1	4.07843	3.16083	-8.57727	0.0381145	HtrA serine peptidase 1 [Source:MGI Symbol;Acc:MGI:1929076]
ENSMUSG00000022221	Ripk3	5.95857	0	8.54382	0.00112994	receptor-interacting serine-threonine kinase 3 [Source:MGI Symbol;Acc:MGI:2154952]
ENSMUSG00000067825	Pex26	1.81961	3.05833	-8.52882	0.0327372	peroxisomal biogenesis factor 26 [Source:MGI Symbol;Acc:MGI:1921293]
ENSMUSG00000052794	1700030K09Rik	2.54118	3.05264	-8.52566	0.048361	RIKEN cDNA 1700030K09 gene [Source:MGI Symbol;Acc:MGI:1919504]
ENSMUSG00000027207	Galk2	1.56863	3.02073	-8.51201	0.0486778	galactokinase 2 [Source:MGI Symbol;Acc:MGI:1917226]
ENSMUSG00000063953	Amd2	0.470588	3.01426	-8.50771	0.0372529	S-adenosylmethionine decarboxylase 2 [Source:MGI Symbol;Acc:MGI:1333111]
ENSMUSG00000043300	B3galnt1	3.23137	2.99649	-8.49955	0.0467563	UDP-GalNAc:betaGlcNAc beta 1,3-galactosaminyltransferase, polypeptide 1 [Source:MGI Symbol;Acc:MGI:1349405]
ENSMUSG00000027249	F2	0.282353	2.98913	-8.49567	0.0378135	coagulation factor II [Source:MGI Symbol;Acc:MGI:88380]
ENSMUSG00000036564	Ndrg4	9.28627	2.96706	-8.48315	0.0199706	N-myc downstream regulated gene 4 [Source:MGI Symbol;Acc:MGI:2384590]
ENSMUSG00000041255	Tmco5b	0	2.93457	-8.46903	0.0411452	transmembrane and coiled-coil domains 5B [Source:MGI Symbol;Acc:MGI:1922525]
ENSMUSG00000079349	Magea5	5.49019	2.92904	-8.46527	0.0281557	melanoma antigen, family A, 5 [Source:MGI Symbol;Acc:MGI:1333838]
ENSMUSG00000016356	Col20a1	0	2.88569	-8.44553	0.0421997	collagen, type XX, alpha 1 [Source:MGI Symbol;Acc:MGI:1920618]
ENSMUSG00000053749	Gm9920	0.345098	2.85835	-8.43166	0.0398798	predicted gene 9920 [Source:MGI Symbol;Acc:MGI:3642228]
ENSMUSG00000024810	Il33	7.90588	2.84501	-8.42458	0.0288316	interleukin 33 [Source:MGI Symbol;Acc:MGI:1924375]
ENSMUSG00000038372	Gmds	1.53725	2.81435	-8.40908	0.0371088	GDP-mannose 4, 6-dehydratase [Source:MGI Symbol;Acc:MGI:1891112]
ENSMUSG00000012819	Cdh23	4.54902	2.79377	-8.39851	0.0434454	cadherin 23 (otocadherin) [Source:MGI Symbol;Acc:MGI:1890219]
ENSMUSG00000029420	Rimbp2	0.12549	2.75246	-8.3775	0.0433975	RIMS binding protein 2 [Source:MGI Symbol;Acc:MGI:2443235]
ENSMUSG00000025666	Tmem47	0	2.74859	-8.37574	0.0457886	transmembrane protein 47 [Source:MGI Symbol;Acc:MGI:2177570]
ENSMUSG00000015189	Casd1	2.22745	2.71873	-8.35938	0.0373434	CAS1 domain containing 1 [Source:MGI Symbol;Acc:MGI:2384865]
ENSMUSG00000028558	Calr4	1.03529	2.71678	-8.35937	0.0432977	calreticulin 4 [Source:MGI Symbol;Acc:MGI:2140435]
ENSMUSG00000026880	Stom	1.34902	2.71562	-8.35753	0.0446099	stomatin [Source:MGI Symbol;Acc:MGI:95403]
ENSMUSG00000040097	Flywch1	0	2.65177	-8.32423	0.0479875	FLYWCH-type zinc finger 1 [Source:MGI Symbol;Acc:MGI:2442638]
ENSMUSG00000019848	Popdc3	4.4549	2.57652	-8.28179	0.03214	popeye domain containing 3 [Source:MGI Symbol;Acc:MGI:1930153]
ENSMUSG00000049539	Hist1h1a	0.470588	2.55799	-8.27225	0.0472746	histone cluster 1, H1a [Source:MGI Symbol;Acc:MGI:1931523]
ENSMUSG00000095026	Gm3336	0	2.55104	-8.26814	0.0482648	predicted gene 3336 [Source:MGI Symbol;Acc:MGI:3781514]
ENSMUSG00000002204	Napsa	2.76829	0	8.2476	0.00318531	napsin A aspartic peptidase [Source:MGI Symbol;Acc:MGI:109365]
ENSMUSG00000075271	Ttc30a1	5.05098	2.50435	-8.24274	0.0479847	tetratricopeptide repeat domain 30A1 [Source:MGI Symbol;Acc:MGI:1926052]
ENSMUSG00000039110	Mycbpap	6.90196	2.49236	-8.23374	0.023316	MYCBP associated protein [Source:MGI Symbol;Acc:MGI:2388726]
ENSMUSG00000036381	P2ry14	1.28627	2.44466	-8.20711	0.0462354	purinergic receptor P2Y, G-protein coupled, 14 [Source:MGI Symbol;Acc:MGI:2155705]
ENSMUSG00000047085	Lrrc4b	2.07059	2.40995	-8.18674	0.0445128	leucine rich repeat containing 4B [Source:MGI Symbol;Acc:MGI:3027390]
ENSMUSG00000066196	Spag8	4.58039	2.40338	-8.18364	0.0414509	sperm associated antigen 8 [Source:MGI Symbol;Acc:MGI:3056295]
ENSMUSG00000098832	Gm27205	1.47451	2.37498	-8.16587	0.0491793	predicted gene 27205 [Source:MGI Symbol;Acc:MGI:5521048]
ENSMUSG00000036918	Ttc7	1.2549	2.32915	-8.13754	0.0496787	tetratricopeptide repeat domain 7 [Source:MGI Symbol;Acc:MGI:1920999]
ENSMUSG00000036181	Hist1h1c	2.94902	2.30594	-8.12355	0.0452609	histone cluster 1, H1c [Source:MGI Symbol;Acc:MGI:1931526]
ENSMUSG00000039323	Igfbp2	1.75686	2.29228	-8.11484	0.0480584	insulin-like growth factor binding protein 2 [Source:MGI Symbol;Acc:MGI:96437]
ENSMUSG00000072675	Duxbl2	0.622946	27.1484	-7.39706	1.12154e-05	doubl homeobox B-like 2 [Source:MGI Symbol;Acc:MGI:3710620]
ENSMUSG00000042414	Prdm14	6.62886	0.0224729	7.13168	0.00262815	PR domain containing 14 [Source:MGI Symbol;Acc:MGI:3588194]
ENSMUSG00000035969	Rusc2	1.80744	17.6796	-6.87694	0.000104185	RUN and SH3 domain containing 2 [Source:MGI Symbol;Acc:MGI:2140371]
ENSMUSG00000095891	Gm10717	3.17282	0.0256177	6.76523	0.00837972	predicted gene 10717 [Source:MGI Symbol;Acc:MGI:3642031]
ENSMUSG00000081087	Rps15a-ps7	10.5753	0.134837	6.69164	0.00474617	ribosomal protein S15A, pseudogene 7 [Source:MGI Symbol;Acc:MGI:3650538]
ENSMUSG00000053388	Trim50	3.50764	0.0223328	6.62432	0.00958818	tripartite motif-containing 50 [Source:MGI Symbol;Acc:MGI:2664992]
ENSMUSG00000099859		271.314	96.0303	-6.56566	1.41502e-05
ENSMUSG00000066406	Akap13	6.39549	14.6467	-6.50344	0.000204719	A kinase (PRKA) anchor protein 13 [Source:MGI Symbol;Acc:MGI:2676556]
ENSMUSG00000081344	Gm14303	34.2776	0.625318	6.33131	3.73076e-05	predicted gene 14303 [Source:MGI Symbol;Acc:MGI:3651379]
ENSMUSG00000026425	Srgap2	0.560201	13.1478	-6.32629	0.0024524	SLIT-ROBO Rho GTPase activating protein 2 [Source:MGI Symbol;Acc:MGI:109605]
ENSMUSG00000024766	Lipo1	4.93933	0.0446656	6.27764	0.00931139	lipase, member O1 [Source:MGI Symbol;Acc:MGI:2147592]
ENSMUSG00000025265	Fgd1	0.929007	10.9058	-6.2003	0.00567102	FYVE, RhoGEF and PH domain containing 1 [Source:MGI Symbol;Acc:MGI:104566]
ENSMUSG00000035829	Ppp1r26	0.521164	10.8053	-6.1875	0.00594177	protein phosphatase 1, regulatory subunit 26 [Source:MGI Symbol;Acc:MGI:2685193]
ENSMUSG00000073940	Hbb-bt	279.742	232.969	-6.15733	0.000241261	hemoglobin, beta adult t chain [Source:MGI Symbol;Acc:MGI:5474850]
ENSMUSG00000016520	Lnx2	1.59549	10.8385	-6.029	0.011243	ligand of numb-protein X 2 [Source:MGI Symbol;Acc:MGI:2155959]
ENSMUSG00000029998	Pcyox1	0.152358	10.751	-6.02727	0.00672509	prenylcysteine oxidase 1 [Source:MGI Symbol;Acc:MGI:1914131]
ENSMUSG00000098496	1810026B05Rik	2.02499	0.0224729	5.97634	0.021379	RIKEN cDNA 1810026B05 gene [Source:MGI Symbol;Acc:MGI:1916420]
ENSMUSG00000017300	Tnnc2	1.77014	0.0224729	5.96308	0.0237448	troponin C2, fast [Source:MGI Symbol;Acc:MGI:98780]
ENSMUSG00000101337	Dnah7c	4.32569	0.0674186	5.96068	0.0163781	dynein, axonemal, heavy chain 7C [Source:MGI Symbol;Acc:MGI:3639762]
ENSMUSG00000026796	Fam129b	18.4886	26.6764	-5.86013	1.62173e-07	family with sequence similarity 129, member B [Source:MGI Symbol;Acc:MGI:2442910]
ENSMUSG00000085622	3110056K07Rik	5.08361	0.0898915	5.83622	0.0195115	RIKEN cDNA 3110056K07 gene [Source:MGI Symbol;Acc:MGI:1920454]
ENSMUSG00000040964	Arhgef10l	2.12883	9.08608	-5.78545	0.00894284	Rho guanine nucleotide exchange factor (GEF) 10-like [Source:MGI Symbol;Acc:MGI:1920004]
ENSMUSG00000042788	Fam166b	8.17906	0.140566	5.69038	0.0092358	family with sequence similarity 166, member B [Source:MGI Symbol;Acc:MGI:2445194]
ENSMUSG00000044703	Phf11a	0.176066	7.37106	-5.64639	0.0233126	PHD finger protein 11A [Source:MGI Symbol;Acc:MGI:1918441]
ENSMUSG00000031103	Elf4	4.6188	14.3036	-5.63865	0.000503311	E74-like factor 4 (ets domain transcription factor) [Source:MGI Symbol;Acc:MGI:1928377]
ENSMUSG00000011832	Evi5l	2.90548	6.91049	-5.55315	0.0249957	ecotropic viral integration site 5 like [Source:MGI Symbol;Acc:MGI:2442167]
ENSMUSG00000025648	Pfkfb4	5.17196	7.68716	-5.5508	0.00868228	6-phosphofructo-2-kinase/fructose-2,6-biphosphatase 4 [Source:MGI Symbol;Acc:MGI:2687284]
ENSMUSG00000081684	Rps2-ps13	193.46	6.10575	5.54763	3.69654e-17	ribosomal protein S2, pseudogene 13 [Source:MGI Symbol;Acc:MGI:3705640]
ENSMUSG00000041592	Sdk2	0.215103	7.72941	-5.53484	0.0252946	sidekick homolog 2 (chicken) [Source:MGI Symbol;Acc:MGI:2443847]
ENSMUSG00000026181	Ppm1f	5.07018	6.83363	-5.5284	0.0146231	protein phosphatase 1F (PP2C domain containing) [Source:MGI Symbol;Acc:MGI:1918464]
ENSMUSG00000064032	Gm10143	8.87594	0.269114	5.51183	0.0119345	predicted gene 10143 [Source:MGI Symbol;Acc:MGI:3704492]
ENSMUSG00000044976	Wdr72	2.50079	14.4804	-5.45738	0.00429389	WD repeat domain 72 [Source:MGI Symbol;Acc:MGI:3583957]
ENSMUSG00000031026	Trim66	0.0819484	6.351	-5.43859	0.039167	tripartite motif-containing 66 [Source:MGI Symbol;Acc:MGI:2152406]
ENSMUSG00000029337	Fgf5	1.46234	6.37057	-5.43553	0.0273823	fibroblast growth factor 5 [Source:MGI Symbol;Acc:MGI:95519]
ENSMUSG00000100327		0.497456	7.0661	-5.40242	0.0323343	Rho GTPase-activating protein 30 [Source:UniProtKB/Swiss-Prot;Acc:Q640N3]
ENSMUSG00000036943	Rab8b	0.215103	6.76096	-5.33664	0.0369694	RAB8B, member RAS oncogene family [Source:MGI Symbol;Acc:MGI:2442982]
ENSMUSG00000024098	Twsg1	9.65373	13.1854	-5.32743	0.00385022	twisted gastrulation homolog 1 (Drosophila) [Source:MGI Symbol;Acc:MGI:2137520]
ENSMUSG00000082658	Fau-ps2	6.10089	0.179783	5.32395	0.0272315	Finkel-Biskis-Reilly murine sarcoma virus (FBR-MuSV) ubiquitously expressed (fox derived), pseudogene 2 [Source:MGI Symbol;Acc:MGI:103018]
ENSMUSG00000069972	Rps13-ps2	76.292	2.7916	5.29587	0.000249988	ribosomal protein S13, pseudogene 2 [Source:MGI Symbol;Acc:MGI:3704295]
ENSMUSG00000074500	Zfp558	2.94451	6.45047	-5.28318	0.023573	zinc finger protein 558 [Source:MGI Symbol;Acc:MGI:1921681]
ENSMUSG00000028024	Enpep	2.75177	12.6967	-5.2688	0.00535272	glutamyl aminopeptidase [Source:MGI Symbol;Acc:MGI:106645]
ENSMUSG00000074075	Gm10621	4.21095	10.8889	-5.26322	0.00590557	predicted gene 10621 [Source:MGI Symbol;Acc:MGI:3642291]
ENSMUSG00000034330	Plcg2	5.74307	26.1169	-5.23405	1.166e-05	phospholipase C, gamma 2 [Source:MGI Symbol;Acc:MGI:97616]
ENSMUSG00000051413	Plagl2	0.905299	6.29122	-5.23255	0.0411814	pleiomorphic adenoma gene-like 2 [Source:MGI Symbol;Acc:MGI:1933165]
ENSMUSG00000045532	C1ql1	0.646654	5.47946	-5.22522	0.0466746	complement component 1, q subcomponent-like 1 [Source:MGI Symbol;Acc:MGI:1344400]
ENSMUSG00000071202	Ccdc78	12.0273	0.291128	5.20364	0.00408023	coiled-coil domain containing 78 [Source:MGI Symbol;Acc:MGI:2685784]
ENSMUSG00000043822	Adamtsl5	1.43413	12.4299	-5.19939	0.0296646	ADAMTS-like 5 [Source:MGI Symbol;Acc:MGI:1913798]
ENSMUSG00000068394	Cep152	0.649814	11.9095	-5.1694	0.00883284	centrosomal protein 152 [Source:MGI Symbol;Acc:MGI:2139083]
ENSMUSG00000000056	Narf	6.07726	11.7904	-5.16934	0.00441451	nuclear prelamin A recognition factor [Source:MGI Symbol;Acc:MGI:1914858]
ENSMUSG00000027820	Mme	0.336089	11.8143	-5.1431	0.0171986	membrane metallo endopeptidase [Source:MGI Symbol;Acc:MGI:97004]
ENSMUSG00000018001	Cyth3	1.01799	18.971	-5.10141	0.000579023	cytohesin 3 [Source:MGI Symbol;Acc:MGI:1335107]
ENSMUSG00000062773	Tex101	11.4064	0.307412	5.0247	0.0139309	testis expressed gene 101 [Source:MGI Symbol;Acc:MGI:1930791]
ENSMUSG00000026404	Ddx59	6.63683	0.205401	4.98311	0.0276837	DEAD (Asp-Glu-Ala-Asp) box polypeptide 59 [Source:MGI Symbol;Acc:MGI:1915247]
ENSMUSG00000081406	Rps6-ps4	221.889	9.83175	4.97483	1.37519e-05	ribosomal protein S6, pseudogene 4 [Source:MGI Symbol;Acc:MGI:3650907]
ENSMUSG00000035498	Cdcp1	0.367461	10.4782	-4.97416	0.0175695	CUB domain containing protein 1 [Source:MGI Symbol;Acc:MGI:2442010]
ENSMUSG00000053950	Adnp2	3.86586	8.71757	-4.96995	0.0380484	ADNP homeobox 2 [Source:MGI Symbol;Acc:MGI:2448562]
ENSMUSG00000047221	Fam185a	7.98515	0.292147	4.95901	0.0316527	family with sequence similarity 185, member A [Source:MGI Symbol;Acc:MGI:2140983]
ENSMUSG00000034903	Cobll1	1.16268	20.8305	-4.93377	0.000863818	Cobl-like 1 [Source:MGI Symbol;Acc:MGI:2442894]
ENSMUSG00000035954	Dock4	0.163897	8.26362	-4.8847	0.0295069	dedicator of cytokinesis 4 [Source:MGI Symbol;Acc:MGI:1918006]
ENSMUSG00000058625	Gm17383	20.4561	1.05622	4.84801	0.00749168	predicted gene, 17383 [Source:MGI Symbol;Acc:MGI:4937017]
ENSMUSG00000051817	Sox12	4.43056	8.04101	-4.83012	0.0143361	SRY (sex determining region Y)-box 12 [Source:MGI Symbol;Acc:MGI:98360]
ENSMUSG00000030103	Bhlhe40	4.28903	9.36702	-4.82408	0.013953	basic helix-loop-helix family, member e40 [Source:MGI Symbol;Acc:MGI:1097714]
ENSMUSG00000024952	Rps6ka4	0.245845	11.6647	-4.8236	0.0157826	ribosomal protein S6 kinase, polypeptide 4 [Source:MGI Symbol;Acc:MGI:1930076]
ENSMUSG00000028173	Wls	2.61095	7.77135	-4.80639	0.0481141	wntless homolog (Drosophila) [Source:MGI Symbol;Acc:MGI:1915401]
ENSMUSG00000034334	Fam151b	5.85196	0.204941	4.77629	0.0466465	family with sequence similarity 151, member B [Source:MGI Symbol;Acc:MGI:1921192]
ENSMUSG00000020892	Aloxe3	11.7589	0.64122	4.75929	0.0164349	arachidonate lipoxygenase 3 [Source:MGI Symbol;Acc:MGI:1345140]
ENSMUSG00000034659	Tmem109	2.30489	8.27921	-4.75748	0.0219856	transmembrane protein 109 [Source:MGI Symbol;Acc:MGI:1915789]
ENSMUSG00000037369	Kdm6a	39.6404	119.411	-4.75111	1.28651e-15	lysine (K)-specific demethylase 6A [Source:MGI Symbol;Acc:MGI:1095419]
ENSMUSG00000075014	Gm10800	37.1391	1.89857	4.75004	3.81611e-08	predicted gene 10800 [Source:MGI Symbol;Acc:MGI:3641657]
ENSMUSG00000002881	Nab1	10.1512	13.0124	-4.73354	0.00145014	Ngfi-A binding protein 1 [Source:MGI Symbol;Acc:MGI:107564]
ENSMUSG00000034832	Tet3	6.76295	13.0623	-4.72971	0.00268253	tet methylcytosine dioxygenase 3 [Source:MGI Symbol;Acc:MGI:2446229]
ENSMUSG00000050192	Eif5a2	6.42687	4.25117	-4.68139	0.0455751	eukaryotic translation initiation factor 5A2 [Source:MGI Symbol;Acc:MGI:1933735]
ENSMUSG00000026814	Eng	2.6737	7.11266	-4.66387	0.0303181	endoglin [Source:MGI Symbol;Acc:MGI:95392]
ENSMUSG00000022263	Trio	1.06153	10.0903	-4.63017	0.0400753	triple functional domain (PTPRF interacting) [Source:MGI Symbol;Acc:MGI:1927230]
ENSMUSG00000043439	E130012A19Rik	8.17021	16.208	-4.61997	0.0012483	RIKEN cDNA E130012A19 gene [Source:MGI Symbol;Acc:MGI:2143991]
ENSMUSG00000068735	Trp53i11	11.9049	7.18874	-4.55235	0.0317496	transformation related protein 53 inducible protein 11 [Source:MGI Symbol;Acc:MGI:2670995]
ENSMUSG00000029016	Clcn6	12.6085	25.302	-4.5448	7.60029e-05	chloride channel 6 [Source:MGI Symbol;Acc:MGI:1347049]
ENSMUSG00000059456	Ptk2b	0.63314	14.9711	-4.54144	0.0165789	PTK2 protein tyrosine kinase 2 beta [Source:MGI Symbol;Acc:MGI:104908]
ENSMUSG00000032235	Narg2	1.55511	11.698	-4.52761	0.0252727	NMDA receptor-regulated gene 2 [Source:MGI Symbol;Acc:MGI:2135947]
ENSMUSG00000037020	Wdr62	25.5205	36.0067	-4.50854	8.56141e-08	WD repeat domain 62 [Source:MGI Symbol;Acc:MGI:1923696]
ENSMUSG00000004508	Gab2	2.6737	6.34069	-4.50157	0.0419218	growth factor receptor bound protein 2-associated protein 2 [Source:MGI Symbol;Acc:MGI:1333854]
ENSMUSG00000036863	Syde2	36.0063	116.661	-4.45975	1.59773e-13	synapse defective 1, Rho GTPase, homolog 2 (C. elegans) [Source:MGI Symbol;Acc:MGI:3036264]
ENSMUSG00000069919	Hba-a1	697.712	690.191	-4.4286	0.00385022	hemoglobin alpha, adult chain 1 [Source:MGI Symbol;Acc:MGI:96015]
ENSMUSG00000046861	Hectd3	2.70428	35.7928	-4.41894	2.50223e-05	HECT domain containing 3 [Source:MGI Symbol;Acc:MGI:1923858]
ENSMUSG00000000148	Brat1	6.69642	11.6556	-4.40837	0.00593768	BRCA1-associated ATM activator 1 [Source:MGI Symbol;Acc:MGI:1891679]
ENSMUSG00000030029	Lrig1	6.99465	34.7314	-4.40576	1.71403e-05	leucine-rich repeats and immunoglobulin-like domains 1 [Source:MGI Symbol;Acc:MGI:107935]
ENSMUSG00000000555	Itga5	4.91766	23.998	-4.39757	0.000479589	integrin alpha 5 (fibronectin receptor alpha) [Source:MGI Symbol;Acc:MGI:96604]
ENSMUSG00000005803	Sqrdl	10.3348	0.371585	4.39489	0.01396	sulfide quinone reductase-like (yeast) [Source:MGI Symbol;Acc:MGI:1929899]
ENSMUSG00000035284	Vps13c	2.42904	13.9407	-4.37046	0.0118497	vacuolar protein sorting 13C (yeast) [Source:MGI Symbol;Acc:MGI:2444207]
ENSMUSG00000034220	Gpc1	3.62476	0.207985	4.36095	0.0455179	glypican 1 [Source:MGI Symbol;Acc:MGI:1194891]
ENSMUSG00000058838	Rps27a-ps2	10.5526	0.770367	4.34239	0.0442888	ribosomal protein S27A, pseudogene 2 [Source:MGI Symbol;Acc:MGI:3643614]
ENSMUSG00000075033	Nxpe3	3.16349	8.29818	-4.33131	0.0269386	neurexophilin and PC-esterase domain family, member 3 [Source:MGI Symbol;Acc:MGI:2686598]
ENSMUSG00000018166	Erbb3	11.4765	37.7816	-4.31778	2.15009e-05	v-erb-b2 erythroblastic leukemia viral oncogene homolog 3 (avian) [Source:MGI Symbol;Acc:MGI:95411]
ENSMUSG00000039062	Anpep	5.40177	12.6387	-4.31336	0.00709035	alanyl (membrane) aminopeptidase [Source:MGI Symbol;Acc:MGI:5000466]
ENSMUSG00000033128	Gga1	2.6564	15.8157	-4.29171	0.00469401	golgi associated, gamma adaptin ear containing, ARF binding protein 1 [Source:MGI Symbol;Acc:MGI:2146207]
ENSMUSG00000072889	Nfxl1	2.5117	13.1039	-4.28771	0.0158696	nuclear transcription factor, X-box binding-like 1 [Source:MGI Symbol;Acc:MGI:1923646]
ENSMUSG00000021706	Zfyve16	5.71415	19.6339	-4.28683	0.00173777	zinc finger, FYVE domain containing 16 [Source:MGI Symbol;Acc:MGI:2145181]
ENSMUSG00000038886	Man2a2	7.15863	12.2993	-4.27914	0.00500768	mannosidase 2, alpha 2 [Source:MGI Symbol;Acc:MGI:2150656]
ENSMUSG00000053693	Mast1	17.2393	45.5846	-4.26484	9.9445e-07	microtubule associated serine/threonine kinase 1 [Source:MGI Symbol;Acc:MGI:1861901]
ENSMUSG00000028709	Mob3c	2.59879	7.86256	-4.25848	0.0366976	MOB kinase activator 3C [Source:MGI Symbol;Acc:MGI:2140623]
ENSMUSG00000040997	Abhd4	9.92644	17.2353	-4.25215	0.00110417	abhydrolase domain containing 4 [Source:MGI Symbol;Acc:MGI:1915938]
ENSMUSG00000029175	Slc35f6	4.69237	35.0872	-4.24897	0.000157117	solute carrier family 35, member F6 [Source:MGI Symbol;Acc:MGI:1922169]
ENSMUSG00000022075	Rhobtb2	4.31653	30.5684	-4.22766	0.000104185	Rho-related BTB domain containing 2 [Source:MGI Symbol;Acc:MGI:2180557]
ENSMUSG00000054252	Fgfr3	11.9618	40.7301	-4.21143	3.06105e-06	fibroblast growth factor receptor 3 [Source:MGI Symbol;Acc:MGI:95524]
ENSMUSG00000026608	Kctd3	13.2327	38.9131	-4.19806	1.31347e-05	potassium channel tetramerisation domain containing 3 [Source:MGI Symbol;Acc:MGI:2444629]
ENSMUSG00000026028	Trak2	11.3888	42.9759	-4.17548	7.35856e-06	trafficking protein, kinesin binding 2 [Source:MGI Symbol;Acc:MGI:1918077]
ENSMUSG00000028556	Dock7	2.75114	10.2475	-4.16032	0.0299084	dedicator of cytokinesis 7 [Source:MGI Symbol;Acc:MGI:1914549]
ENSMUSG00000038080	Kdm1b	4.30689	14.7885	-4.13431	0.00831451	lysine (K)-specific demethylase 1B [Source:MGI Symbol;Acc:MGI:2145261]
ENSMUSG00000036281	Snapc4	4.71411	41.6359	-4.11102	1.68352e-05	small nuclear RNA activating complex, polypeptide 4 [Source:MGI Symbol;Acc:MGI:2443935]
ENSMUSG00000031636	Pdlim3	13.8505	1.19555	4.10678	0.0162437	PDZ and LIM domain 3 [Source:MGI Symbol;Acc:MGI:1859274]
ENSMUSG00000031665	Sall1	6.47603	54.685	-4.07129	6.99652e-06	sal-like 1 (Drosophila) [Source:MGI Symbol;Acc:MGI:1889585]
ENSMUSG00000008855	Hdac5	3.39843	7.87614	-4.05948	0.0413859	histone deacetylase 5 [Source:MGI Symbol;Acc:MGI:1333784]
ENSMUSG00000079575	Rbpsuh-rs3	1.53078	34.786	-4.05681	0.000492081	recombining binding protein suppressor of hairless (Drosophila), related sequence 3 [Source:MGI Symbol;Acc:MGI:96525]
ENSMUSG00000034035	Ccdc17	30.1724	0.505122	4.0554	0.00046689	coiled-coil domain containing 17 [Source:MGI Symbol;Acc:MGI:1915667]
ENSMUSG00000042632	Pla2g6	14.0152	24.2162	-4.0416	0.000220863	phospholipase A2, group VI [Source:MGI Symbol;Acc:MGI:1859152]
ENSMUSG00000070923	Klhl9	5.49588	10.3836	-4.02498	0.0167056	kelch-like 9 [Source:MGI Symbol;Acc:MGI:2180122]
ENSMUSG00000023092	Fhl1	6.95119	8.15397	-4.02041	0.0317871	four and a half LIM domains 1 [Source:MGI Symbol;Acc:MGI:1298387]
ENSMUSG00000024083	Pja2	0.483942	11.1095	-4.02018	0.0474406	praja 2, RING-H2 motif containing [Source:MGI Symbol;Acc:MGI:2159342]
ENSMUSG00000026153	Fam135a	11.3619	13.7238	-3.97181	0.00214431	family with sequence similarity 135, member A [Source:MGI Symbol;Acc:MGI:1915437]
ENSMUSG00000060419	Rps16-ps2	76.6642	6.50375	3.96847	0.00983168	ribosomal protein S16, pseudogene 2 [Source:MGI Symbol;Acc:MGI:3704259]
ENSMUSG00000020067	Mypn	12.4713	33.477	-3.96661	1.68493e-05	myopalladin [Source:MGI Symbol;Acc:MGI:1916052]
ENSMUSG00000063550	Nup98	9.68756	51.6821	-3.94598	2.81113e-06	nucleoporin 98 [Source:MGI Symbol;Acc:MGI:109404]
ENSMUSG00000021027	Ralgapa1	3.96306	26.638	-3.94077	0.000568803	Ral GTPase activating protein, alpha subunit 1 [Source:MGI Symbol;Acc:MGI:1931050]
ENSMUSG00000031808	Slc27a1	0.850856	20.1562	-3.9375	0.00617859	solute carrier family 27 (fatty acid transporter), member 1 [Source:MGI Symbol;Acc:MGI:1347098]
ENSMUSG00000083327	Vcp-rs	124.484	289.943	-3.93592	0.00478671	valosin containing protein, related sequence [Source:MGI Symbol;Acc:MGI:894298]
ENSMUSG00000037426	Depdc5	4.39334	12.3911	-3.93556	0.0168051	DEP domain containing 5 [Source:MGI Symbol;Acc:MGI:2141101]
ENSMUSG00000031824	6430548M08Rik	2.84526	8.75419	-3.93322	0.04332	RIKEN cDNA 6430548M08 gene [Source:MGI Symbol;Acc:MGI:2443793]
ENSMUSG00000040875	Osbpl10	5.65646	28.6416	-3.92591	0.000354131	oxysterol binding protein-like 10 [Source:MGI Symbol;Acc:MGI:1921736]
ENSMUSG00000024209	1700061G19Rik	5.98892	15.7691	-3.88662	0.00568754	RIKEN cDNA 1700061G19 gene [Source:MGI Symbol;Acc:MGI:1925875]
ENSMUSG00000020752	Recql5	13.2865	36.0566	-3.88047	3.92801e-05	RecQ protein-like 5 [Source:MGI Symbol;Acc:MGI:2156841]
ENSMUSG00000019979	Apaf1	6.96384	39.3664	-3.88023	1.26462e-05	apoptotic peptidase activating factor 1 [Source:MGI Symbol;Acc:MGI:1306796]
ENSMUSG00000041528	Rnf123	5.3621	12.2737	-3.8728	0.0148571	ring finger protein 123 [Source:MGI Symbol;Acc:MGI:2148796]
ENSMUSG00000038705	Gmeb2	2.26776	13.4603	-3.86024	0.0199211	glucocorticoid modulatory element binding protein 2 [Source:MGI Symbol;Acc:MGI:2652836]
ENSMUSG00000046691	Chtf8	4.38188	11.5768	-3.8515	0.0187697	CTF8, chromosome transmission fidelity factor 8 [Source:MGI Symbol;Acc:MGI:2443370]
ENSMUSG00000059981	Taok2	23.4528	59.8637	-3.82907	3.24878e-08	TAO kinase 2 [Source:MGI Symbol;Acc:MGI:1915919]
ENSMUSG00000068742	Cry2	14.8173	27.804	-3.82466	0.000223271	cryptochrome 2 (photolyase-like) [Source:MGI Symbol;Acc:MGI:1270859]
ENSMUSG00000031995	St14	23.1404	52.8907	-3.81174	6.42637e-07	suppression of tumorigenicity 14 (colon carcinoma) [Source:MGI Symbol;Acc:MGI:1338881]
ENSMUSG00000069917	Hba-a2	661.151	601.57	-3.80491	0.00703334	hemoglobin alpha, adult chain 2 [Source:MGI Symbol;Acc:MGI:96016]
ENSMUSG00000052512	Nav2	1.14024	21.5719	-3.78348	0.00762876	neuron navigator 2 [Source:MGI Symbol;Acc:MGI:2183691]
ENSMUSG00000052305	Hbb-bs	849.847	642.802	-3.77098	0.00856631	hemoglobin, beta adult s chain [Source:MGI Symbol;Acc:MGI:5474852]
ENSMUSG00000047804	Akap10	3.30107	20.6043	-3.75674	0.00448903	A kinase (PRKA) anchor protein 10 [Source:MGI Symbol;Acc:MGI:1890218]
ENSMUSG00000024130	Abca3	13.3907	38.3912	-3.75604	1.14176e-05	ATP-binding cassette, sub-family A (ABC1), member 3 [Source:MGI Symbol;Acc:MGI:1351617]
ENSMUSG00000016933	Plcg1	20.0379	55.2327	-3.72976	2.20722e-06	phospholipase C, gamma 1 [Source:MGI Symbol;Acc:MGI:97615]
ENSMUSG00000030019	Fbxl14	3.04748	13.2238	-3.68717	0.0269643	F-box and leucine-rich repeat protein 14 [Source:MGI Symbol;Acc:MGI:2141676]
ENSMUSG00000058301	Upf1	25.7878	122.912	-3.67634	4.26665e-09	UPF1 regulator of nonsense transcripts homolog (yeast) [Source:MGI Symbol;Acc:MGI:107995]
ENSMUSG00000041062	Mslnl	6.6912	10.741	-3.66318	0.0277748	mesothelin-like [Source:MGI Symbol;Acc:MGI:3607710]
ENSMUSG00000011877	Git1	21.4815	48.2726	-3.65975	8.82841e-07	G protein-coupled receptor kinase-interactor 1 [Source:MGI Symbol;Acc:MGI:1927140]
ENSMUSG00000020300	Cpeb4	7.86984	16.7722	-3.61841	0.0105476	cytoplasmic polyadenylation element binding protein 4 [Source:MGI Symbol;Acc:MGI:1914829]
ENSMUSG00000039458	Mtmr12	21.8371	23.6712	-3.61553	0.000255136	myotubularin related protein 12 [Source:MGI Symbol;Acc:MGI:2443034]
ENSMUSG00000028591	Pramef12	13.7243	34.5499	-3.61358	3.68711e-05	PRAME family member 12 [Source:MGI Symbol;Acc:MGI:1924882]
ENSMUSG00000097657	Gm7389	3.64427	10.627	-3.60808	0.0293378	predicted gene 7389 [Source:MGI Symbol;Acc:MGI:3645153]
ENSMUSG00000028337	Coro2a	7.58433	13.9805	-3.60181	0.0134166	coronin, actin binding protein 2A [Source:MGI Symbol;Acc:MGI:1345966]
ENSMUSG00000052533	Nup188	3.58785	15.5228	-3.59114	0.0135068	nucleoporin 188 [Source:MGI Symbol;Acc:MGI:2446190]
ENSMUSG00000009090	Ap1b1	72.6067	150.104	-3.58446	7.57813e-12	adaptor protein complex AP-1, beta 1 subunit [Source:MGI Symbol;Acc:MGI:1096368]
ENSMUSG00000031529	Tnks	4.38117	11.1328	-3.55287	0.0400545	tankyrase, TRF1-interacting ankyrin-related ADP-ribose polymerase [Source:MGI Symbol;Acc:MGI:1341087]
ENSMUSG00000032913	Lrig2	10.42	11.8768	-3.55261	0.0143536	leucine-rich repeats and immunoglobulin-like domains 2 [Source:MGI Symbol;Acc:MGI:2443718]
ENSMUSG00000061517	Sox21	30.5249	102.018	-3.5512	2.02813e-09	SRY (sex determining region Y)-box 21 [Source:MGI Symbol;Acc:MGI:2654070]
ENSMUSG00000033392	Clasp2	5.79981	28.374	-3.55057	0.00416604	CLIP associating protein 2 [Source:MGI Symbol;Acc:MGI:1923749]
ENSMUSG00000040078	Gm9769	11.0204	24.0623	-3.54967	0.00268883	predicted pseudogene 9769 [Source:MGI Symbol;Acc:MGI:3704271]
ENSMUSG00000002948	Map2k7	12.1825	49.5843	-3.54956	7.72642e-06	mitogen-activated protein kinase kinase 7 [Source:MGI Symbol;Acc:MGI:1346871]
ENSMUSG00000039206	Daglb	4.60149	9.28574	-3.54237	0.0438944	diacylglycerol lipase, beta [Source:MGI Symbol;Acc:MGI:2442032]
ENSMUSG00000057880	Abat	4.76025	16.6365	-3.53312	0.0168402	4-aminobutyrate aminotransferase [Source:MGI Symbol;Acc:MGI:2443582]
ENSMUSG00000032531	Amotl2	20.0158	112.761	-3.52842	1.99009e-08	angiomotin-like 2 [Source:MGI Symbol;Acc:MGI:1929286]
ENSMUSG00000001918	Slc1a5	7.45111	42.149	-3.52333	0.000196178	solute carrier family 1 (neutral amino acid transporter), member 5 [Source:MGI Symbol;Acc:MGI:105305]
ENSMUSG00000044313	Mab21l3	4.17437	21.9589	-3.52229	0.00426688	mab-21-like 3 (C. elegans) [Source:MGI Symbol;Acc:MGI:2446273]
ENSMUSG00000040506	Ambra1	5.77199	56.1659	-3.52042	6.57304e-05	autophagy/beclin 1 regulator 1 [Source:MGI Symbol;Acc:MGI:2443564]
ENSMUSG00000024319	Vps52	21.3883	14.0031	-3.49177	0.00162881	vacuolar protein sorting 52 (yeast) [Source:MGI Symbol;Acc:MGI:1330304]
ENSMUSG00000007617	Homer1	5.0784	13.5997	-3.49141	0.0161197	homer homolog 1 (Drosophila) [Source:MGI Symbol;Acc:MGI:1347345]
ENSMUSG00000028933	Xrcc2	6.96653	21.4215	-3.48715	0.00493043	X-ray repair complementing defective repair in Chinese hamster cells 2 [Source:MGI Symbol;Acc:MGI:1927345]
ENSMUSG00000036568	Gltscr1l	6.34998	24.7671	-3.48492	0.0033681	GLTSCR1-like [Source:MGI Symbol;Acc:MGI:2673855]
ENSMUSG00000035161	Ints6	23.7793	86.1025	-3.48164	3.704e-08	integrator complex subunit 6 [Source:MGI Symbol;Acc:MGI:1202397]
ENSMUSG00000042055	Wdr11	11.1914	43.1867	-3.47502	7.06568e-05	WD repeat domain 11 [Source:MGI Symbol;Acc:MGI:1920230]
ENSMUSG00000025417	Pip4k2c	17.31	93.7019	-3.47217	1.0259e-08	phosphatidylinositol-5-phosphate 4-kinase, type II, gamma [Source:MGI Symbol;Acc:MGI:2152214]
ENSMUSG00000024892	Pcx	4.53038	24.2017	-3.46398	0.0106815	pyruvate carboxylase [Source:MGI Symbol;Acc:MGI:97520]
ENSMUSG00000034157	Cipc	1.03063	15.1363	-3.44537	0.0461794	CLOCK interacting protein, circadian [Source:MGI Symbol;Acc:MGI:1919185]
ENSMUSG00000025089	Gfra1	1.51797	12.2332	-3.43623	0.0387188	glial cell line derived neurotrophic factor family receptor alpha 1 [Source:MGI Symbol;Acc:MGI:1100842]
ENSMUSG00000076435	Acsf2	14.9021	64.8241	-3.43507	3.03637e-07	acyl-CoA synthetase family member 2 [Source:MGI Symbol;Acc:MGI:2388287]
ENSMUSG00000024206	Rfx2	11.6411	7.29847	-3.42934	0.0289576	regulatory factor X, 2 (influences HLA class II expression) [Source:MGI Symbol;Acc:MGI:106583]
ENSMUSG00000005958	Ephb3	11.7645	12.8099	-3.42841	0.0176883	Eph receptor B3 [Source:MGI Symbol;Acc:MGI:104770]
ENSMUSG00000040479	Dgkz	17.5239	83.2312	-3.41592	4.30561e-08	diacylglycerol kinase zeta [Source:MGI Symbol;Acc:MGI:1278339]
ENSMUSG00000083594	Gm13722	47.9476	5.94128	3.41539	1.54367e-05	predicted gene 13722 [Source:MGI Symbol;Acc:MGI:3651668]
ENSMUSG00000070738	Dgkd	4.65191	22.1516	-3.38916	0.00431351	diacylglycerol kinase, delta [Source:MGI Symbol;Acc:MGI:2138334]
ENSMUSG00000001552	Jup	41.3783	81.0028	-3.38476	2.64548e-08	junction plakoglobin [Source:MGI Symbol;Acc:MGI:96650]
ENSMUSG00000101635		11.3606	26.738	-3.38193	0.000828184
ENSMUSG00000025153	Fasn	38.54	166.02	-3.35748	2.31851e-08	fatty acid synthase [Source:MGI Symbol;Acc:MGI:95485]
ENSMUSG00000020782	Llgl2	25.5272	56.4414	-3.35425	3.12173e-06	lethal giant larvae homolog 2 (Drosophila) [Source:MGI Symbol;Acc:MGI:1918843]
ENSMUSG00000035246	Pcyt1b	13.8396	23.8976	-3.35283	0.00311359	phosphate cytidylyltransferase 1, choline, beta isoform [Source:MGI Symbol;Acc:MGI:2147987]
ENSMUSG00000030094	Xpc	13.4099	30.3462	-3.35015	0.000241261	xeroderma pigmentosum, complementation group C [Source:MGI Symbol;Acc:MGI:103557]
ENSMUSG00000009621	Vav2	2.17601	25.8262	-3.34168	0.00362815	vav 2 oncogene [Source:MGI Symbol;Acc:MGI:102718]
ENSMUSG00000024942	Capn1	37.8883	129.252	-3.338	2.86759e-09	calpain 1 [Source:MGI Symbol;Acc:MGI:88263]
ENSMUSG00000019338	Zfp687	3.45082	12.2078	-3.33785	0.0481869	zinc finger protein 687 [Source:MGI Symbol;Acc:MGI:1925516]
ENSMUSG00000027652	Ralgapb	4.74548	24.0515	-3.3377	0.00466414	Ral GTPase activating protein, beta subunit (non-catalytic) [Source:MGI Symbol;Acc:MGI:2444531]
ENSMUSG00000081999	Gm13461	21.0593	45.7993	-3.33733	0.000564885	predicted gene 13461 [Source:MGI Symbol;Acc:MGI:3650103]
ENSMUSG00000026979	Psd4	8.56999	43.5727	-3.33463	0.000179349	pleckstrin and Sec7 domain containing 4 [Source:MGI Symbol;Acc:MGI:2674093]
ENSMUSG00000022426	Josd1	6.40292	26.8817	-3.33126	0.00178593	Josephin domain containing 1 [Source:MGI Symbol;Acc:MGI:1921408]
ENSMUSG00000019876	Pkib	19.9194	2.46496	3.32804	0.00528881	protein kinase inhibitor beta, cAMP dependent, testis specific [Source:MGI Symbol;Acc:MGI:101937]
ENSMUSG00000002900	Lamb1	7.61224	59.1335	-3.32099	0.00150397	laminin B1 [Source:MGI Symbol;Acc:MGI:96743]
ENSMUSG00000035172	Plekhh3	5.53366	11.315	-3.31994	0.0279566	pleckstrin homology domain containing, family H (with MyTH4 domain) member 3 [Source:MGI Symbol;Acc:MGI:2384950]
ENSMUSG00000034300	Fam53c	19.5645	47.7934	-3.30761	2.66247e-05	family with sequence similarity 53, member C [Source:MGI Symbol;Acc:MGI:1913556]
ENSMUSG00000000131	Xpo6	81.037	257.219	-3.30619	7.9641e-14	exportin 6 [Source:MGI Symbol;Acc:MGI:2429950]
ENSMUSG00000022892	App	3.74921	11.0671	-3.30259	0.0476697	amyloid beta (A4) precursor protein [Source:MGI Symbol;Acc:MGI:88059]
ENSMUSG00000002496	Tsc2	29.2828	69.5998	-3.29981	2.67403e-07	tuberous sclerosis 2 [Source:MGI Symbol;Acc:MGI:102548]
ENSMUSG00000028068	Iqgap3	51.6763	147.683	-3.29101	1.51736e-10	IQ motif containing GTPase activating protein 3 [Source:MGI Symbol;Acc:MGI:3028642]
ENSMUSG00000035049	Rrp12	36.9501	126.487	-3.28651	5.90368e-10	ribosomal RNA processing 12 homolog (S. cerevisiae) [Source:MGI Symbol;Acc:MGI:2147437]
ENSMUSG00000036553	Sh3tc1	11.8093	31.1317	-3.28489	0.00068301	SH3 domain and tetratricopeptide repeats 1 [Source:MGI Symbol;Acc:MGI:2678949]
ENSMUSG00000034867	Ankrd27	2.63072	26.0014	-3.26713	0.0092358	ankyrin repeat domain 27 (VPS9 domain) [Source:MGI Symbol;Acc:MGI:2444103]
ENSMUSG00000021823	Vcl	3.64167	28.4121	-3.26624	0.0076328	vinculin [Source:MGI Symbol;Acc:MGI:98927]
ENSMUSG00000030400	Ercc2	3.71974	17.0549	-3.26606	0.0134315	excision repair cross-complementing rodent repair deficiency, complementation group 2 [Source:MGI Symbol;Acc:MGI:95413]
ENSMUSG00000067547	Gm7666	40.6559	6.04963	3.26428	0.0479969	predicted pseudogene 7666 [Source:MGI Symbol;Acc:MGI:3648907]
ENSMUSG00000043940	Wdfy3	12.7097	56.908	-3.25882	6.5207e-05	WD repeat and FYVE domain containing 3 [Source:MGI Symbol;Acc:MGI:1096875]
ENSMUSG00000078624	Olfr613	12.7119	1.70683	3.25155	0.0459021	olfactory receptor 613 [Source:MGI Symbol;Acc:MGI:3030447]
ENSMUSG00000002326	Gmpr2	24.6009	2.67933	3.2297	0.00537306	guanosine monophosphate reductase 2 [Source:MGI Symbol;Acc:MGI:1917903]
ENSMUSG00000024969	Mark2	25.4954	97.6573	-3.22649	8.76327e-09	MAP/microtubule affinity-regulating kinase 2 [Source:MGI Symbol;Acc:MGI:99638]
ENSMUSG00000032185	Carm1	32.2585	103.061	-3.22573	8.76327e-09	coactivator-associated arginine methyltransferase 1 [Source:MGI Symbol;Acc:MGI:1913208]
ENSMUSG00000024740	Ddb1	148.618	488.479	-3.22292	4.60161e-14	damage specific DNA binding protein 1 [Source:MGI Symbol;Acc:MGI:1202384]
ENSMUSG00000031024	St5	22.3734	30.929	-3.22246	0.000112612	suppression of tumorigenicity 5 [Source:MGI Symbol;Acc:MGI:108517]
ENSMUSG00000029467	Atp2a2	77.985	243.557	-3.20783	7.12339e-13	ATPase, Ca++ transporting, cardiac muscle, slow twitch 2 [Source:MGI Symbol;Acc:MGI:88110]
ENSMUSG00000000325	Arvcf	23.9187	74.4369	-3.19207	2.48049e-07	armadillo repeat gene deleted in velo-cardio-facial syndrome [Source:MGI Symbol;Acc:MGI:109620]
ENSMUSG00000039952	Dag1	46.8137	60.4783	-3.18783	8.50189e-07	dystroglycan 1 [Source:MGI Symbol;Acc:MGI:101864]
ENSMUSG00000043683	Fem1a	3.68845	16.3623	-3.17776	0.0329246	feminization 1 homolog a (C. elegans) [Source:MGI Symbol;Acc:MGI:1335089]
ENSMUSG00000049396	Gemin4	36.2981	65.0664	-3.16725	2.52287e-07	gem (nuclear organelle) associated protein 4 [Source:MGI Symbol;Acc:MGI:2449313]
ENSMUSG00000015214	Mtmr1	17.477	26.6047	-3.16104	0.00338249	myotubularin related protein 1 [Source:MGI Symbol;Acc:MGI:1858271]
ENSMUSG00000035206	Sppl2b	2.62179	16.0857	-3.15544	0.0394796	signal peptide peptidase like 2B [Source:MGI Symbol;Acc:MGI:1920468]
ENSMUSG00000092400	Gm20469	36.1265	5.11899	3.15332	0.000155052	predicted gene 20469 [Source:MGI Symbol;Acc:MGI:5141934]
ENSMUSG00000025477	Inpp5a	19.708	37.119	-3.14905	0.000281702	inositol polyphosphate-5-phosphatase A [Source:MGI Symbol;Acc:MGI:2686961]
ENSMUSG00000026858	Fam73b	5.668	17.6396	-3.14888	0.0216468	family with sequence similarity 73, member B [Source:MGI Symbol;Acc:MGI:1922035]
ENSMUSG00000036158	Prickle1	6.50099	12.7859	-3.12475	0.035558	prickle homolog 1 (Drosophila) [Source:MGI Symbol;Acc:MGI:1916034]
ENSMUSG00000009406	Elk1	7.34363	14.7461	-3.12463	0.018657	ELK1, member of ETS oncogene family [Source:MGI Symbol;Acc:MGI:101833]
ENSMUSG00000033762	Recql4	8.66885	14.5557	-3.11745	0.0230307	RecQ protein-like 4 [Source:MGI Symbol;Acc:MGI:1931028]
ENSMUSG00000033444	Specc1l	6.39786	15.7029	-3.11067	0.0316527	sperm antigen with calponin homology and coiled-coil domains 1-like [Source:MGI Symbol;Acc:MGI:1921642]
ENSMUSG00000093924	Gm12623	5.68539	13.0514	-3.10225	0.0277563	predicted gene 12623 [Source:MGI Symbol;Acc:MGI:3650566]
ENSMUSG00000028970	Abcb1b	5.77808	15.8938	-3.09578	0.027707	ATP-binding cassette, sub-family B (MDR/TAP), member 1B [Source:MGI Symbol;Acc:MGI:97568]
ENSMUSG00000042744	Gm15800	6.62001	30.0686	-3.08797	0.00171406	predicted gene 15800 [Source:MGI Symbol;Acc:MGI:3647820]
ENSMUSG00000037373	Ctbp1	19.9821	36.9897	-3.085	0.000170276	C-terminal binding protein 1 [Source:MGI Symbol;Acc:MGI:1201685]
ENSMUSG00000073700	Klhl21	62.4443	161.663	-3.08304	1.1435e-08	kelch-like 21 [Source:MGI Symbol;Acc:MGI:1919288]
ENSMUSG00000047153	Khnyn	23.7953	53.5962	-3.08046	7.44998e-06	KH and NYN domain containing [Source:MGI Symbol;Acc:MGI:2451333]
ENSMUSG00000028454	Pigo	16.5536	39.9687	-3.07775	0.000285242	phosphatidylinositol glycan anchor biosynthesis, class O [Source:MGI Symbol;Acc:MGI:1861452]
ENSMUSG00000017774	Myo1c	48.01	177.939	-3.07579	8.76327e-09	myosin IC [Source:MGI Symbol;Acc:MGI:106612]
ENSMUSG00000020697	Lig3	127.395	255.721	-3.06912	9.99778e-13	ligase III, DNA, ATP-dependent [Source:MGI Symbol;Acc:MGI:109152]
ENSMUSG00000025558	Dock9	27.9017	60.9456	-3.06462	2.01352e-06	dedicator of cytokinesis 9 [Source:MGI Symbol;Acc:MGI:106321]
ENSMUSG00000024588	Fech	16.3091	22.4186	-3.06426	0.00396364	ferrochelatase [Source:MGI Symbol;Acc:MGI:95513]
ENSMUSG00000034593	Myo5a	8.10937	11.1644	-3.05819	0.027695	myosin VA [Source:MGI Symbol;Acc:MGI:105976]
ENSMUSG00000014426	Map3k4	11.0859	21.619	-3.05664	0.00433619	mitogen-activated protein kinase kinase kinase 4 [Source:MGI Symbol;Acc:MGI:1346875]
ENSMUSG00000016552	Foxred2	18.3457	29.0541	-3.05377	0.000940713	FAD-dependent oxidoreductase domain containing 2 [Source:MGI Symbol;Acc:MGI:106315]
ENSMUSG00000043019	Edem3	8.7969	48.7741	-3.05278	0.00320674	ER degradation enhancer, mannosidase alpha-like 3 [Source:MGI Symbol;Acc:MGI:1914217]
ENSMUSG00000048833	Slc39a9	17.0722	74.9912	-3.04642	2.29658e-06	solute carrier family 39 (zinc transporter), member 9 [Source:MGI Symbol;Acc:MGI:1914820]
ENSMUSG00000042350	Arel1	8.41843	33.0928	-3.04448	0.000773865	apoptosis resistant E3 ubiquitin protein ligase 1 [Source:MGI Symbol;Acc:MGI:1915747]
ENSMUSG00000036327	Qsox2	7.92051	23.2484	-3.03708	0.0108178	quiescin Q6 sulfhydryl oxidase 2 [Source:MGI Symbol;Acc:MGI:2387194]
ENSMUSG00000097312	Gm26870	32.5101	5.43321	3.03623	0.000927153	predicted gene, 26870 [Source:MGI Symbol;Acc:MGI:5477364]
ENSMUSG00000062234	Gak	21.3174	70.553	-3.03592	2.12735e-06	cyclin G associated kinase [Source:MGI Symbol;Acc:MGI:2442153]
ENSMUSG00000030849	Fgfr2	44.1557	110.457	-3.0349	1.4503e-06	fibroblast growth factor receptor 2 [Source:MGI Symbol;Acc:MGI:95523]
ENSMUSG00000020715	Ern1	4.90264	27.231	-3.03165	0.0163766	endoplasmic reticulum (ER) to nucleus signalling 1 [Source:MGI Symbol;Acc:MGI:1930134]
ENSMUSG00000045216	Hs6st1	24.5647	58.7121	-3.02734	4.33707e-06	heparan sulfate 6-O-sulfotransferase 1 [Source:MGI Symbol;Acc:MGI:1354958]
ENSMUSG00000022100	Xpo7	53.2514	157.227	-3.0273	6.57156e-09	exportin 7 [Source:MGI Symbol;Acc:MGI:1929705]
ENSMUSG00000032290	Ptpn9	8.25651	15.1181	-3.02555	0.0280732	protein tyrosine phosphatase, non-receptor type 9 [Source:MGI Symbol;Acc:MGI:1928376]
ENSMUSG00000060096	Amd-ps3	36.0796	6.63415	3.02534	0.00253633	S-adenosylmethionine decarboxylase, pseudogene 3 [Source:MGI Symbol;Acc:MGI:3704487]
ENSMUSG00000019368	Sec14l4	9.54548	19.289	-3.02257	0.0130114	SEC14-like 4 (S. cerevisiae) [Source:MGI Symbol;Acc:MGI:2144095]
ENSMUSG00000039262	Prrc2b	5.52781	13.6645	-3.02043	0.0279571	proline-rich coiled-coil 2B [Source:MGI Symbol;Acc:MGI:1923304]
ENSMUSG00000042726	Trafd1	5.88382	16.1251	-3.01953	0.0233126	TRAF type zinc finger domain containing 1 [Source:MGI Symbol;Acc:MGI:1923551]
ENSMUSG00000058290	Espl1	83.5124	246.78	-3.01533	1.3506e-11	extra spindle pole bodies 1 (S. cerevisiae) [Source:MGI Symbol;Acc:MGI:2146156]
ENSMUSG00000024477	Pggt1b	1.85533	18.7371	-3.01238	0.0316118	protein geranylgeranyltransferase type I, beta subunit [Source:MGI Symbol;Acc:MGI:1917514]
ENSMUSG00000050721	Plekho2	11.9105	28.1213	-3.00931	0.00220316	pleckstrin homology domain containing, family O member 2 [Source:MGI Symbol;Acc:MGI:2143132]
ENSMUSG00000028582	Cc2d1b	5.25637	15.8664	-2.99786	0.0316527	coiled-coil and C2 domain containing 1B [Source:MGI Symbol;Acc:MGI:2443076]
ENSMUSG00000039000	Ube3c	46.5298	153.033	-2.99373	5.13511e-08	ubiquitin protein ligase E3C [Source:MGI Symbol;Acc:MGI:2140998]
ENSMUSG00000028430	Nol6	71.5704	196.334	-2.99278	4.88834e-08	nucleolar protein family 6 (RNA-associated) [Source:MGI Symbol;Acc:MGI:2140151]
ENSMUSG00000052684	Jun	35.6014	43.2429	-2.98878	0.000168647	jun proto-oncogene [Source:MGI Symbol;Acc:MGI:96646]
ENSMUSG00000026135	Zfp142	10.5133	29.2899	-2.98044	0.00173253	zinc finger protein 142 [Source:MGI Symbol;Acc:MGI:1924514]
ENSMUSG00000017756	Slc12a7	147.802	328.148	-2.97567	2.32401e-11	solute carrier family 12, member 7 [Source:MGI Symbol;Acc:MGI:1342283]
ENSMUSG00000028760	Eif4g3	6.0135	43.3181	-2.97459	0.00283464	eukaryotic translation initiation factor 4 gamma, 3 [Source:MGI Symbol;Acc:MGI:1923935]
ENSMUSG00000058013	Sept11	14.9114	15.3788	-2.97442	0.0082053	septin 11 [Source:MGI Symbol;Acc:MGI:1277214]
ENSMUSG00000022335	Zfat	5.11926	24.6072	-2.96623	0.0063096	zinc finger and AT hook domain containing [Source:MGI Symbol;Acc:MGI:2681865]
ENSMUSG00000054986	Sec14l3	15.8116	9.32107	-2.966	0.0467563	SEC14-like 3 (S. cerevisiae) [Source:MGI Symbol;Acc:MGI:3617848]
ENSMUSG00000019808	Adat2	21.8102	3.62503	2.96547	0.0215908	adenosine deaminase, tRNA-specific 2 [Source:MGI Symbol;Acc:MGI:1914007]
ENSMUSG00000026274	Pask	8.30709	25.5142	-2.96028	0.00502886	PAS domain containing serine/threonine kinase [Source:MGI Symbol;Acc:MGI:2155936]
ENSMUSG00000029414	Kntc1	7.51826	16.713	-2.94853	0.0266494	kinetochore associated 1 [Source:MGI Symbol;Acc:MGI:2673709]
ENSMUSG00000042010	Acacb	16.1667	22.3127	-2.94585	0.00824143	acetyl-Coenzyme A carboxylase beta [Source:MGI Symbol;Acc:MGI:2140940]
ENSMUSG00000021670	Hmgcr	8.31554	14.5558	-2.93866	0.0389214	3-hydroxy-3-methylglutaryl-Coenzyme A reductase [Source:MGI Symbol;Acc:MGI:96159]
ENSMUSG00000006276	Eps15l1	12.5327	29.4074	-2.93681	0.00122223	epidermal growth factor receptor pathway substrate 15-like 1 [Source:MGI Symbol;Acc:MGI:104582]
ENSMUSG00000020170	Frs2	10.2305	47.1098	-2.92927	0.00232264	fibroblast growth factor receptor substrate 2 [Source:MGI Symbol;Acc:MGI:1100860]
ENSMUSG00000070583	Fv1	9.51528	14.4085	-2.92522	0.0229885	Friend virus susceptibility 1 [Source:MGI Symbol;Acc:MGI:95595]
ENSMUSG00000060143	Gm10076	83.8358	14.9743	2.92339	5.79966e-07	predicted gene 10076 [Source:MGI Symbol;Acc:MGI:3704451]
ENSMUSG00000066306	Numa1	10.7212	83.9753	-2.9201	9.16671e-05	nuclear mitotic apparatus protein 1 [Source:MGI Symbol;Acc:MGI:2443665]
ENSMUSG00000041949	Tango6	6.48298	26.0845	-2.9188	0.00504745	transport and golgi organization 6 [Source:MGI Symbol;Acc:MGI:2142786]
ENSMUSG00000034591	Slc41a2	16.1888	17.5615	-2.91553	0.0200531	solute carrier family 41, member 2 [Source:MGI Symbol;Acc:MGI:2442940]
ENSMUSG00000042644	Itpr3	6.09694	20.7	-2.90662	0.0230307	inositol 1,4,5-triphosphate receptor 3 [Source:MGI Symbol;Acc:MGI:96624]
ENSMUSG00000070031	Sp140	21.7794	4.0574	2.90481	0.0159847	Sp140 nuclear body protein [Source:MGI Symbol;Acc:MGI:3702467]
ENSMUSG00000046027	Stard5	5.33823	15.5868	-2.90449	0.0439916	StAR-related lipid transfer (START) domain containing 5 [Source:MGI Symbol;Acc:MGI:2156765]
ENSMUSG00000026288	Inpp5d	38.447	71.2523	-2.90235	5.41033e-06	inositol polyphosphate-5-phosphatase D [Source:MGI Symbol;Acc:MGI:107357]
ENSMUSG00000024212	Mllt1	17.9573	62.3929	-2.9011	9.35204e-06	myeloid/lymphoid or mixed-lineage leukemia (trithorax homolog, Drosophila); translocated to, 1 [Source:MGI Symbol;Acc:MGI:1927238]
ENSMUSG00000022443	Myh9	14.9554	39.8677	-2.90039	0.000321413	myosin, heavy polypeptide 9, non-muscle [Source:MGI Symbol;Acc:MGI:107717]
ENSMUSG00000036885	Arhgef26	5.88003	14.8048	-2.89954	0.035558	Rho guanine nucleotide exchange factor (GEF) 26 [Source:MGI Symbol;Acc:MGI:1918053]
ENSMUSG00000055491	Pprc1	117.635	332.967	-2.8972	2.456e-11	peroxisome proliferative activated receptor, gamma, coactivator-related 1 [Source:MGI Symbol;Acc:MGI:2385096]
ENSMUSG00000026483	Fam129a	24.8049	105.298	-2.89394	6.32408e-07	family with sequence similarity 129, member A [Source:MGI Symbol;Acc:MGI:2137237]
ENSMUSG00000036026	Tmem63b	5.88239	17.4169	-2.89323	0.0311834	transmembrane protein 63b [Source:MGI Symbol;Acc:MGI:2387609]
ENSMUSG00000035495	Tstd2	17.8398	69.7036	-2.89282	1.166e-05	thiosulfate sulfurtransferase (rhodanese)-like domain containing 2 [Source:MGI Symbol;Acc:MGI:3039624]
ENSMUSG00000024687	Osbp	42.2376	66.2424	-2.89207	1.43141e-06	oxysterol binding protein [Source:MGI Symbol;Acc:MGI:97447]
ENSMUSG00000001632	Brpf1	44.7736	113.322	-2.89144	1.48331e-07	bromodomain and PHD finger containing, 1 [Source:MGI Symbol;Acc:MGI:1926033]
ENSMUSG00000031555	Adam9	17.0464	37.3847	-2.89028	0.000420266	a disintegrin and metallopeptidase domain 9 (meltrin gamma) [Source:MGI Symbol;Acc:MGI:105376]
ENSMUSG00000037971	1110032A03Rik	20.3042	3.18453	2.88242	0.0365052	RIKEN cDNA 1110032A03 gene [Source:MGI Symbol;Acc:MGI:1915971]
ENSMUSG00000026821	Ralgds	25.4673	105.949	-2.87639	9.32185e-07	ral guanine nucleotide dissociation stimulator [Source:MGI Symbol;Acc:MGI:107485]
ENSMUSG00000007613	Tgfbr1	5.10811	29.9397	-2.87587	0.0199214	transforming growth factor, beta receptor I [Source:MGI Symbol;Acc:MGI:98728]
ENSMUSG00000042428	Mgat3	24.0898	45.1183	-2.87144	7.60029e-05	mannoside acetylglucosaminyltransferase 3 [Source:MGI Symbol;Acc:MGI:104532]
ENSMUSG00000040855	Reps2	6.186	13.9113	-2.87037	0.031718	RALBP1 associated Eps domain containing protein 2 [Source:MGI Symbol;Acc:MGI:2663511]
ENSMUSG00000048799	Cep120	33.8833	76.454	-2.86478	2.12735e-06	centrosomal protein 120 [Source:MGI Symbol;Acc:MGI:2147298]
ENSMUSG00000021182	Ccdc88c	9.73987	29.2186	-2.86379	0.00362485	coiled-coil domain containing 88C [Source:MGI Symbol;Acc:MGI:1915589]
ENSMUSG00000042506	Usp22	95.4481	295.93	-2.86264	5.59657e-09	ubiquitin specific peptidase 22 [Source:MGI Symbol;Acc:MGI:2144157]
ENSMUSG00000039703	Nploc4	72.3892	251.839	-2.85634	3.51652e-08	nuclear protein localization 4 homolog (S. cerevisiae) [Source:MGI Symbol;Acc:MGI:2679787]
ENSMUSG00000001288	Rarg	12.4859	45.0011	-2.85413	0.000451256	retinoic acid receptor, gamma [Source:MGI Symbol;Acc:MGI:97858]
ENSMUSG00000025702	March8	12.7166	10.9201	-2.85391	0.0372529	membrane-associated ring finger (C3HC4) 8 [Source:MGI Symbol;Acc:MGI:1919029]
ENSMUSG00000002413	Braf	14.4174	39.3447	-2.85303	0.000524148	Braf transforming gene [Source:MGI Symbol;Acc:MGI:88190]
ENSMUSG00000030600	Lrfn1	4.96184	15.234	-2.84766	0.0299084	leucine rich repeat and fibronectin type III domain containing 1 [Source:MGI Symbol;Acc:MGI:2136810]
ENSMUSG00000007029	Vars	47.5475	98.8885	-2.84758	4.53314e-07	valyl-tRNA synthetase [Source:MGI Symbol;Acc:MGI:90675]
ENSMUSG00000032115	Hyou1	44.7318	71.964	-2.84186	7.03439e-06	hypoxia up-regulated 1 [Source:MGI Symbol;Acc:MGI:108030]
ENSMUSG00000015619	Gata3	13.6593	50.8626	-2.8402	0.000487962	GATA binding protein 3 [Source:MGI Symbol;Acc:MGI:95663]
ENSMUSG00000026655	Fam107b	10.8074	18.7417	-2.83542	0.0185272	family with sequence similarity 107, member B [Source:MGI Symbol;Acc:MGI:1913790]
ENSMUSG00000026930	Gpsm1	12.6927	28.6602	-2.83439	0.00319622	G-protein signalling modulator 1 (AGS3-like, C. elegans) [Source:MGI Symbol;Acc:MGI:1915089]
ENSMUSG00000027284	Cdan1	21.4631	76.7751	-2.83437	4.42453e-06	congenital dyserythropoietic anemia, type I (human) [Source:MGI Symbol;Acc:MGI:1916218]
ENSMUSG00000021171	Esyt2	17.8832	59.1057	-2.83194	0.000255695	extended synaptotagmin-like protein 2 [Source:MGI Symbol;Acc:MGI:1261845]
ENSMUSG00000062175	Tgif2	15.4565	38.8885	-2.83157	0.00121841	TGFB-induced factor homeobox 2 [Source:MGI Symbol;Acc:MGI:1915299]
ENSMUSG00000042557	Sin3a	20.2574	71.3112	-2.83081	7.81273e-06	transcriptional regulator, SIN3A (yeast) [Source:MGI Symbol;Acc:MGI:107157]
ENSMUSG00000078517	Emc1	97.3885	195.702	-2.82087	2.70018e-10	ER membrane protein complex subunit 1 [Source:MGI Symbol;Acc:MGI:2443696]
ENSMUSG00000021009	Ptpn21	25.805	108.653	-2.82042	1.33747e-06	protein tyrosine phosphatase, non-receptor type 21 [Source:MGI Symbol;Acc:MGI:1344406]
ENSMUSG00000041064	Pif1	5.78014	18.0751	-2.81775	0.0384375	PIF1 5'-to-3' DNA helicase homolog (S. cerevisiae) [Source:MGI Symbol;Acc:MGI:2143057]
ENSMUSG00000018412	Kansl1	20.3879	76.4674	-2.81387	1.24346e-05	KAT8 regulatory NSL complex subunit 1 [Source:MGI Symbol;Acc:MGI:1923969]
ENSMUSG00000025507	Pidd1	10.0426	34.8865	-2.81306	0.00133997	p53 induced death domain protein 1 [Source:MGI Symbol;Acc:MGI:1889507]
ENSMUSG00000070939	Tgfbrap1	10.831	26.7812	-2.81251	0.00765411	transforming growth factor, beta receptor associated protein 1 [Source:MGI Symbol;Acc:MGI:2447427]
ENSMUSG00000032867	Fbxw8	12.9416	50.1172	-2.81044	0.000116239	F-box and WD-40 domain protein 8 [Source:MGI Symbol;Acc:MGI:1923041]
ENSMUSG00000046794	Ppp1r3b	4.24366	32.1173	-2.80693	0.021289	protein phosphatase 1, regulatory (inhibitor) subunit 3B [Source:MGI Symbol;Acc:MGI:2177268]
ENSMUSG00000096808		16.5673	2.9879	2.80556	0.0323161
ENSMUSG00000075040	Zfp408	9.68298	24.039	-2.8003	0.00568754	zinc finger protein 408 [Source:MGI Symbol;Acc:MGI:2685857]
ENSMUSG00000078249	Hmga1-rs1	2.82835	23.0942	-2.79381	0.0187697	high mobility group AT-hook I, related sequence 1 [Source:MGI Symbol;Acc:MGI:96161]
ENSMUSG00000044641	Pard6b	55.7105	124.137	-2.79343	2.84972e-08	par-6 family cell polarity regulator beta [Source:MGI Symbol;Acc:MGI:2135605]
ENSMUSG00000054008	Ndst1	8.39925	44.1576	-2.79304	0.00279727	N-deacetylase/N-sulfotransferase (heparan glucosaminyl) 1 [Source:MGI Symbol;Acc:MGI:104719]
ENSMUSG00000071604	Fam189a2	7.5136	24.8684	-2.7914	0.0267365	family with sequence similarity 189, member A2 [Source:MGI Symbol;Acc:MGI:2685813]
ENSMUSG00000028397	Kdm4c	15.5761	76.4436	-2.78741	1.94936e-05	lysine (K)-specific demethylase 4C [Source:MGI Symbol;Acc:MGI:1924054]
ENSMUSG00000025857	Heatr2	32.7612	89.8216	-2.7871	2.95687e-06	HEAT repeat containing 2 [Source:MGI Symbol;Acc:MGI:3616079]
ENSMUSG00000030435	U2af2	21.5527	75.4691	-2.78629	4.64907e-06	U2 small nuclear ribonucleoprotein auxiliary factor (U2AF) 2 [Source:MGI Symbol;Acc:MGI:98886]
ENSMUSG00000022382	Wnt7b	6.1981	20.8074	-2.7859	0.0187954	wingless-related MMTV integration site 7B [Source:MGI Symbol;Acc:MGI:98962]
ENSMUSG00000056836	Gm6851	29.0076	6.29839	2.78491	0.00401383	predicted pseudogene 6851 [Source:MGI Symbol;Acc:MGI:3643618]
ENSMUSG00000021962	Dcp1a	15.811	42.2022	-2.78072	0.00148	DCP1 decapping enzyme homolog A (S. cerevisiae) [Source:MGI Symbol;Acc:MGI:1923151]
ENSMUSG00000078676	Casc3	29.8103	95.0319	-2.77695	2.91609e-05	cancer susceptibility candidate 3 [Source:MGI Symbol;Acc:MGI:2179723]
ENSMUSG00000040715	Rsc1a1	9.33607	27.8898	-2.77435	0.0157864	regulatory solute carrier protein, family 1, member 1 [Source:MGI Symbol;Acc:MGI:3526447]
ENSMUSG00000034723	Tmx4	4.59304	23.2815	-2.76764	0.0203206	thioredoxin-related transmembrane protein 4 [Source:MGI Symbol;Acc:MGI:106558]
ENSMUSG00000029814	Igf2bp3	7.35374	14.3847	-2.76151	0.0421191	insulin-like growth factor 2 mRNA binding protein 3 [Source:MGI Symbol;Acc:MGI:1890359]
ENSMUSG00000041040	Fam117b	12.0959	54.183	-2.76078	0.000304369	family with sequence similarity 117, member B [Source:MGI Symbol;Acc:MGI:1920000]
ENSMUSG00000022412	Mief1	9.47339	26.1367	-2.75336	0.0118225	mitochondrial elongation factor 1 [Source:MGI Symbol;Acc:MGI:2146020]
ENSMUSG00000020868	Xylt2	5.1602	25.7905	-2.75076	0.00878341	xylosyltransferase II [Source:MGI Symbol;Acc:MGI:2444797]
ENSMUSG00000006676	Usp19	92.84	201.217	-2.7477	9.8564e-10	ubiquitin specific peptidase 19 [Source:MGI Symbol;Acc:MGI:1918722]
ENSMUSG00000002799	Jag2	6.23074	25.8529	-2.74293	0.0131308	jagged 2 [Source:MGI Symbol;Acc:MGI:1098270]
ENSMUSG00000038759	Nup205	75.5321	228.951	-2.74079	2.00833e-08	nucleoporin 205 [Source:MGI Symbol;Acc:MGI:2141625]
ENSMUSG00000049739	Zfp646	9.45601	29.4312	-2.73947	0.0238621	zinc finger protein 646 [Source:MGI Symbol;Acc:MGI:3665412]
ENSMUSG00000007670	Khsrp	17.8388	57.3105	-2.73572	6.09425e-05	KH-type splicing regulatory protein [Source:MGI Symbol;Acc:MGI:1336214]
ENSMUSG00000027784	Ppm1l	36.504	148.973	-2.73541	6.62183e-07	protein phosphatase 1 (formerly 2C)-like [Source:MGI Symbol;Acc:MGI:2139740]
ENSMUSG00000071650	Ganab	45.2025	83.7782	-2.73474	9.82539e-07	alpha glucosidase 2 alpha neutral subunit [Source:MGI Symbol;Acc:MGI:1097667]
ENSMUSG00000072825	Cep170b	18.4342	66.6659	-2.72969	3.52548e-05	centrosomal protein 170B [Source:MGI Symbol;Acc:MGI:2145043]
ENSMUSG00000030660	Pik3c2a	22.0661	97.6902	-2.72859	3.06105e-06	phosphatidylinositol 3-kinase, C2 domain containing, alpha polypeptide [Source:MGI Symbol;Acc:MGI:1203729]
ENSMUSG00000006019	Dhx34	10.514	23.4489	-2.72846	0.00664328	DEAH (Asp-Glu-Ala-His) box polypeptide 34 [Source:MGI Symbol;Acc:MGI:1918973]
ENSMUSG00000033732	Sf3b3	112.721	343.298	-2.72466	3.19902e-11	splicing factor 3b, subunit 3 [Source:MGI Symbol;Acc:MGI:1289341]
ENSMUSG00000054626	Xlr	21.6673	3.81491	2.7125	0.0211099	X-linked lymphocyte-regulated [Source:MGI Symbol;Acc:MGI:98976]
ENSMUSG00000021044	Adck1	13.4331	20.7453	-2.70901	0.0197146	aarF domain containing kinase 1 [Source:MGI Symbol;Acc:MGI:1919363]
ENSMUSG00000036529	Sbf1	19.8727	74.8788	-2.70792	1.85481e-05	SET binding factor 1 [Source:MGI Symbol;Acc:MGI:1925230]
ENSMUSG00000079020	Slc45a4	45.6552	125.679	-2.70718	3.83731e-07	solute carrier family 45, member 4 [Source:MGI Symbol;Acc:MGI:2146236]
ENSMUSG00000022983	Scaf4	18.9158	59.4016	-2.70713	0.000104185	SR-related CTD-associated factor 4 [Source:MGI Symbol;Acc:MGI:2146350]
ENSMUSG00000020114	Cand1	373.166	955.613	-2.70602	2.60776e-11	cullin associated and neddylation disassociated 1 [Source:MGI Symbol;Acc:MGI:1261820]
ENSMUSG00000061306	Slc38a10	10.4666	31.9428	-2.70376	0.0027295	solute carrier family 38, member 10 [Source:MGI Symbol;Acc:MGI:1919305]
ENSMUSG00000066440	Zfyve26	7.18969	28.4334	-2.70229	0.0173018	zinc finger, FYVE domain containing 26 [Source:MGI Symbol;Acc:MGI:1924767]
ENSMUSG00000030031	Kbtbd8	11.5817	44.586	-2.70225	0.000561744	kelch repeat and BTB (POZ) domain containing 8 [Source:MGI Symbol;Acc:MGI:2661430]
ENSMUSG00000030852	Tacc2	6.69737	24.6507	-2.69552	0.011798	transforming, acidic coiled-coil containing protein 2 [Source:MGI Symbol;Acc:MGI:1928899]
ENSMUSG00000014859	E2f4	45.4614	128.037	-2.69101	4.64173e-07	E2F transcription factor 4 [Source:MGI Symbol;Acc:MGI:103012]
ENSMUSG00000025203	Scd2	34.0703	62.3457	-2.69006	7.61546e-05	stearoyl-Coenzyme A desaturase 2 [Source:MGI Symbol;Acc:MGI:98240]
ENSMUSG00000029192	Tbc1d14	10.8201	30.7287	-2.68941	0.00396769	TBC1 domain family, member 14 [Source:MGI Symbol;Acc:MGI:1098708]
ENSMUSG00000062081	Gm6055	367.347	79.8061	2.68804	7.50473e-10	predicted gene 6055 [Source:MGI Symbol;Acc:MGI:3648620]
ENSMUSG00000089940	Gm4117	27.798	5.34542	2.68654	0.00467476	predicted gene 4117 [Source:MGI Symbol;Acc:MGI:3782293]
ENSMUSG00000051726	Kcnf1	8.44782	21.5349	-2.68617	0.0317871	potassium voltage-gated channel, subfamily F, member 1 [Source:MGI Symbol;Acc:MGI:2687399]
ENSMUSG00000036180	Gatad2a	102.554	270.709	-2.68521	1.1435e-08	GATA zinc finger domain containing 2A [Source:MGI Symbol;Acc:MGI:2384585]
ENSMUSG00000039164	Naif1	10.4481	21.3451	-2.68386	0.00983168	nuclear apoptosis inducing factor 1 [Source:MGI Symbol;Acc:MGI:1918504]
ENSMUSG00000036550	Cnot1	166.849	590.762	-2.68326	2.86759e-09	CCR4-NOT transcription complex, subunit 1 [Source:MGI Symbol;Acc:MGI:2442402]
ENSMUSG00000029577	Ube3b	26.2707	61.3353	-2.68266	0.000124446	ubiquitin protein ligase E3B [Source:MGI Symbol;Acc:MGI:1891295]
ENSMUSG00000066571	4931406P16Rik	27.6477	67.5411	-2.68037	8.20756e-05	RIKEN cDNA 4931406P16 gene [Source:MGI Symbol;Acc:MGI:1924311]
ENSMUSG00000038214	Bend3	34.8419	102.307	-2.67706	5.46783e-06	BEN domain containing 3 [Source:MGI Symbol;Acc:MGI:2677212]
ENSMUSG00000031862	Atp13a1	51.7014	101.556	-2.67602	2.04995e-06	ATPase type 13A1 [Source:MGI Symbol;Acc:MGI:2180801]
ENSMUSG00000034390	Cmip	19.5347	58.4546	-2.66465	0.000202675	c-Maf inducing protein [Source:MGI Symbol;Acc:MGI:1921690]
ENSMUSG00000053293	Pom121	37.8825	122.241	-2.66376	6.62183e-07	nuclear pore membrane protein 121 [Source:MGI Symbol;Acc:MGI:2137624]
ENSMUSG00000015711	Prune	14.3784	50.256	-2.66356	0.000476319	prune homolog (Drosophila) [Source:MGI Symbol;Acc:MGI:1925152]
ENSMUSG00000034354	Mtmr3	41.3654	104.996	-2.66123	9.01178e-07	myotubularin related protein 3 [Source:MGI Symbol;Acc:MGI:1921552]
ENSMUSG00000028626	Col9a2	42.253	48.9866	-2.65718	4.03529e-05	collagen, type IX, alpha 2 [Source:MGI Symbol;Acc:MGI:88466]
ENSMUSG00000071267	Zfp942	18.7598	32.487	-2.65366	0.00546313	zinc finger protein 942 [Source:MGI Symbol;Acc:MGI:1920483]
ENSMUSG00000040325	Vprbp	70.4573	184.217	-2.65176	1.48331e-07	Vpr (HIV-1) binding protein [Source:MGI Symbol;Acc:MGI:2445220]
ENSMUSG00000025332	Kdm5c	29.3793	78.355	-2.64754	1.58748e-05	lysine (K)-specific demethylase 5C [Source:MGI Symbol;Acc:MGI:99781]
ENSMUSG00000030522	Mtmr10	18.5515	32.4848	-2.64428	0.00323505	myotubularin related protein 10 [Source:MGI Symbol;Acc:MGI:2142292]
ENSMUSG00000058997	Vwa8	11.7428	12.1729	-2.64344	0.037674	von Willebrand factor A domain containing 8 [Source:MGI Symbol;Acc:MGI:1919008]
ENSMUSG00000029594	Rbm19	26.4789	51.304	-2.64185	0.000172322	RNA binding motif protein 19 [Source:MGI Symbol;Acc:MGI:1921361]
ENSMUSG00000034206	Polq	8.02606	39.8177	-2.64019	0.0213785	polymerase (DNA directed), theta [Source:MGI Symbol;Acc:MGI:2155399]
ENSMUSG00000033396	Spg11	5.92332	18.8533	-2.63392	0.0319979	spastic paraplegia 11 [Source:MGI Symbol;Acc:MGI:2444989]
ENSMUSG00000044700	Tmem201	35.2861	126.662	-2.62988	7.25299e-05	transmembrane protein 201 [Source:MGI Symbol;Acc:MGI:1196277]
ENSMUSG00000028707	Dmbx1	12.009	20.2697	-2.6283	0.0110125	diencephalon/mesencephalon homeobox 1 [Source:MGI Symbol;Acc:MGI:2153518]
ENSMUSG00000020015	Cdk17	18.0835	50.3782	-2.62629	0.00028045	cyclin-dependent kinase 17 [Source:MGI Symbol;Acc:MGI:97517]
ENSMUSG00000032086	Bace1	13.8546	29.8747	-2.62413	0.0118629	beta-site APP cleaving enzyme 1 [Source:MGI Symbol;Acc:MGI:1346542]
ENSMUSG00000025314	Ptprj	15.5299	14.1336	-2.62412	0.0210983	protein tyrosine phosphatase, receptor type, J [Source:MGI Symbol;Acc:MGI:104574]
ENSMUSG00000040356	Skiv2l	15.9564	45.0845	-2.62103	0.00166904	superkiller viralicidic activity 2-like (S. cerevisiae) [Source:MGI Symbol;Acc:MGI:1099835]
ENSMUSG00000028906	Epb4.1	15.1576	27.9246	-2.62046	0.00500768	erythrocyte protein band 4.1 [Source:MGI Symbol;Acc:MGI:95401]
ENSMUSG00000002221	Paxip1	26.3426	64.2578	-2.61634	5.11798e-05	PAX interacting (with transcription-activation domain) protein 1 [Source:MGI Symbol;Acc:MGI:1890430]
ENSMUSG00000049295	Zfp219	27.1037	63.1026	-2.61463	5.54168e-05	zinc finger protein 219 [Source:MGI Symbol;Acc:MGI:1917140]
ENSMUSG00000042211	Fbxo38	34.4124	65.6202	-2.61161	2.92559e-05	F-box protein 38 [Source:MGI Symbol;Acc:MGI:2444639]
ENSMUSG00000021360	Gcnt2	4.83809	24.1879	-2.6078	0.0203206	glucosaminyl (N-acetyl) transferase 2, I-branching enzyme [Source:MGI Symbol;Acc:MGI:1100870]
ENSMUSG00000027177	Hipk3	70.5579	252.745	-2.59621	3.31723e-08	homeodomain interacting protein kinase 3 [Source:MGI Symbol;Acc:MGI:1314882]
ENSMUSG00000049106	Dcaf5	17.8587	36.2556	-2.59306	0.00144626	DDB1 and CUL4 associated factor 5 [Source:MGI Symbol;Acc:MGI:2444785]
ENSMUSG00000057551	Zfp317	5.87355	16.5966	-2.59258	0.0412432	zinc finger protein 317 [Source:MGI Symbol;Acc:MGI:107775]
ENSMUSG00000082691	Dynlt1-ps1	47.0537	9.07065	2.59154	0.000259807	dynein light chain Tctex-type 1, pseuodogene 1 [Source:MGI Symbol;Acc:MGI:3642625]
ENSMUSG00000025354	Dnajc14	25.6402	56.3346	-2.59152	0.000190957	DnaJ (Hsp40) homolog, subfamily C, member 14 [Source:MGI Symbol;Acc:MGI:1921580]
ENSMUSG00000026867	Gapvd1	34.0373	127.077	-2.58293	4.21818e-06	GTPase activating protein and VPS9 domains 1 [Source:MGI Symbol;Acc:MGI:1913941]
ENSMUSG00000040463	Mybbp1a	351.303	842.973	-2.58114	2.17988e-10	MYB binding protein (P160) 1a [Source:MGI Symbol;Acc:MGI:106181]
ENSMUSG00000040351	Ankib1	15.692	39.579	-2.57948	0.00168881	ankyrin repeat and IBR domain containing 1 [Source:MGI Symbol;Acc:MGI:1918047]
ENSMUSG00000070283	Ndufaf3	18.6336	3.73176	2.5773	0.0387927	NADH dehydrogenase (ubiquinone) 1 alpha subcomplex, assembly factor 3 [Source:MGI Symbol;Acc:MGI:1913956]
ENSMUSG00000023034	Nr4a1	18.1936	62.8729	-2.5772	0.000241261	nuclear receptor subfamily 4, group A, member 1 [Source:MGI Symbol;Acc:MGI:1352454]
ENSMUSG00000020198	Ap3d1	64.7446	144.833	-2.57638	9.30114e-07	adaptor-related protein complex 3, delta 1 subunit [Source:MGI Symbol;Acc:MGI:107734]
ENSMUSG00000021745	Ptprg	4.56071	28.6208	-2.57187	0.014145	protein tyrosine phosphatase, receptor type, G [Source:MGI Symbol;Acc:MGI:97814]
ENSMUSG00000022505	Emp2	18.2092	26.3596	-2.57012	0.00585331	epithelial membrane protein 2 [Source:MGI Symbol;Acc:MGI:1098726]
ENSMUSG00000014355	Anapc1	27.0865	114.132	-2.56649	1.18066e-06	anaphase promoting complex subunit 1 [Source:MGI Symbol;Acc:MGI:103097]
ENSMUSG00000052155	Acvr2a	5.80803	28.3012	-2.56578	0.011446	activin receptor IIA [Source:MGI Symbol;Acc:MGI:102806]
ENSMUSG00000039929	Urb1	18.1582	54.7522	-2.56548	0.000457099	URB1 ribosome biogenesis 1 homolog (S. cerevisiae) [Source:MGI Symbol;Acc:MGI:2146468]
ENSMUSG00000024201	Kdm4b	17.1241	38.6554	-2.5569	0.0134299	lysine (K)-specific demethylase 4B [Source:MGI Symbol;Acc:MGI:2442355]
ENSMUSG00000053128	Rnf26	22.3889	27.7942	-2.55664	0.00471076	ring finger protein 26 [Source:MGI Symbol;Acc:MGI:2388131]
ENSMUSG00000013483	Card14	36.7506	8.14201	2.55171	0.0013618	caspase recruitment domain family, member 14 [Source:MGI Symbol;Acc:MGI:2386258]
ENSMUSG00000057672	Pkn1	6.17952	15.6972	-2.55127	0.0470072	protein kinase N1 [Source:MGI Symbol;Acc:MGI:108022]
ENSMUSG00000027678	Ncoa3	119.552	339.999	-2.55126	8.38226e-10	nuclear receptor coactivator 3 [Source:MGI Symbol;Acc:MGI:1276535]
ENSMUSG00000017405	Nek8	7.18732	15.8934	-2.54893	0.0429352	NIMA (never in mitosis gene a)-related expressed kinase 8 [Source:MGI Symbol;Acc:MGI:1890646]
ENSMUSG00000025795	Rassf3	27.5807	62.7177	-2.5451	8.777e-05	Ras association (RalGDS/AF-6) domain family member 3 [Source:MGI Symbol;Acc:MGI:2179722]
ENSMUSG00000024077	Strn	11.8911	46.8991	-2.54087	0.00676807	striatin, calmodulin binding protein [Source:MGI Symbol;Acc:MGI:1333757]
ENSMUSG00000034902	Pip5k1c	12.0843	24.1041	-2.54083	0.023882	phosphatidylinositol-4-phosphate 5-kinase, type 1 gamma [Source:MGI Symbol;Acc:MGI:1298224]
ENSMUSG00000027189	Trim44	12.1371	28.863	-2.54017	0.0092358	tripartite motif-containing 44 [Source:MGI Symbol;Acc:MGI:1931835]
ENSMUSG00000046312	AI464131	29.0904	104.63	-2.53953	2.23115e-06	expressed sequence AI464131 [Source:MGI Symbol;Acc:MGI:2140300]
ENSMUSG00000074802	Gas2l3	10.4759	32.1068	-2.53835	0.00765411	growth arrest-specific 2 like 3 [Source:MGI Symbol;Acc:MGI:1918780]
ENSMUSG00000040648	Ppip5k2	46.3526	153.904	-2.53507	1.6578e-06	diphosphoinositol pentakisphosphate kinase 2 [Source:MGI Symbol;Acc:MGI:2142810]
ENSMUSG00000046862	Pramef8	12.1762	14.5172	-2.53506	0.0346249	PRAME family member 8 [Source:MGI Symbol;Acc:MGI:2140473]
ENSMUSG00000015127	Unkl	28.6515	40.9371	-2.53323	0.000536386	unkempt-like (Drosophila) [Source:MGI Symbol;Acc:MGI:1921404]
ENSMUSG00000039740	Alg2	20.0279	41.1312	-2.53312	0.000894399	asparagine-linked glycosylation 2 (alpha-1,3-mannosyltransferase) [Source:MGI Symbol;Acc:MGI:1914731]
ENSMUSG00000034908	Sidt2	294.429	567.682	-2.5307	1.89676e-10	SID1 transmembrane family, member 2 [Source:MGI Symbol;Acc:MGI:2446134]
ENSMUSG00000034543	Morc2a	20.6886	86.166	-2.52799	1.46197e-05	microrchidia 2A [Source:MGI Symbol;Acc:MGI:1921772]
ENSMUSG00000036022	Fam122b	23.3539	12.7969	-2.52667	0.0245698	family with sequence similarity 122, member B [Source:MGI Symbol;Acc:MGI:1926005]
ENSMUSG00000023079	Gtf2ird1	23.0328	32.416	-2.52457	0.00324151	general transcription factor II I repeat domain-containing 1 [Source:MGI Symbol;Acc:MGI:1861942]
ENSMUSG00000037119	D15Ertd621e	66.6301	175.45	-2.5184	8.28831e-07	DNA segment, Chr 15, ERATO Doi 621, expressed [Source:MGI Symbol;Acc:MGI:1277178]
ENSMUSG00000020536	Llgl1	44.4607	100.716	-2.51801	4.27109e-06	lethal giant larvae homolog 1 (Drosophila) [Source:MGI Symbol;Acc:MGI:102682]
ENSMUSG00000041341	Atg2b	21.9734	67.8025	-2.5163	0.000175541	autophagy related 2B [Source:MGI Symbol;Acc:MGI:1923809]
ENSMUSG00000050966	Lin28a	12.8069	42.3998	-2.50892	0.00324542	lin-28 homolog A (C. elegans) [Source:MGI Symbol;Acc:MGI:1890546]
ENSMUSG00000027298	Tyro3	12.035	27.6031	-2.50832	0.00932543	TYRO3 protein tyrosine kinase 3 [Source:MGI Symbol;Acc:MGI:104294]
ENSMUSG00000070643	Sox13	11.5318	29.9104	-2.50492	0.00568878	SRY (sex determining region Y)-box 13 [Source:MGI Symbol;Acc:MGI:98361]
ENSMUSG00000003810	Mast2	12.8571	37.2162	-2.50411	0.00262815	microtubule associated serine/threonine kinase 2 [Source:MGI Symbol;Acc:MGI:894676]
ENSMUSG00000033124	Atg9a	188.456	366.145	-2.50255	1.65148e-09	autophagy related 9A [Source:MGI Symbol;Acc:MGI:2138446]
ENSMUSG00000030138	Bms1	43.9517	124.502	-2.50159	0.000124446	BMS1 homolog, ribosome assembly protein (yeast) [Source:MGI Symbol;Acc:MGI:2446132]
ENSMUSG00000087412	Gm15501	418.567	104.617	2.50063	2.06858e-10	predicted pseudogene 15501 [Source:MGI Symbol;Acc:MGI:3704296]
ENSMUSG00000054648	Zfp869	6.97215	28.4304	-2.49955	0.0165789	zinc finger protein 869 [Source:MGI Symbol;Acc:MGI:1914119]
ENSMUSG00000032834	Pwp2	58.6943	150.166	-2.49936	7.90655e-07	PWP2 periodic tryptophan protein homolog (yeast) [Source:MGI Symbol;Acc:MGI:1341200]
ENSMUSG00000029705	Cux1	11.0909	52.9977	-2.49757	0.00169214	cut-like homeobox 1 [Source:MGI Symbol;Acc:MGI:88568]
ENSMUSG00000083844	2210015D19Rik	32.8521	7.01845	2.49725	0.0141752	RIKEN cDNA 2210015D19 gene [Source:MGI Symbol;Acc:MGI:1913774]
ENSMUSG00000029120	Ppp2r2c	21.2164	25.8451	-2.49626	0.00854983	protein phosphatase 2, regulatory subunit B, gamma [Source:MGI Symbol;Acc:MGI:2442660]
ENSMUSG00000020456	Ogdh	85.5049	157.944	-2.49007	6.50706e-07	oxoglutarate (alpha-ketoglutarate) dehydrogenase (lipoamide) [Source:MGI Symbol;Acc:MGI:1098267]
ENSMUSG00000030788	Rnf141	11.9914	27.9343	-2.48738	0.0206747	ring finger protein 141 [Source:MGI Symbol;Acc:MGI:1914400]
ENSMUSG00000020128	Vps54	43.43	111.031	-2.48574	5.16516e-05	vacuolar protein sorting 54 (yeast) [Source:MGI Symbol;Acc:MGI:2178798]
ENSMUSG00000000303	Cdh1	154.404	404.792	-2.48484	1.1702e-09	cadherin 1 [Source:MGI Symbol;Acc:MGI:88354]
ENSMUSG00000057193	Slc44a2	13.8918	37.9947	-2.48454	0.00221908	solute carrier family 44, member 2 [Source:MGI Symbol;Acc:MGI:1915932]
ENSMUSG00000039477	Tnrc18	28.7264	86.1482	-2.48428	1.12116e-05	trinucleotide repeat containing 18 [Source:MGI Symbol;Acc:MGI:3648294]
ENSMUSG00000027002	Nckap1	96.8147	210.52	-2.48048	6.86121e-09	NCK-associated protein 1 [Source:MGI Symbol;Acc:MGI:1355333]
ENSMUSG00000040010	Slc7a5	21.8699	88.7776	-2.4803	2.0988e-05	solute carrier family 7 (cationic amino acid transporter, y+ system), member 5 [Source:MGI Symbol;Acc:MGI:1298205]
ENSMUSG00000005610	Eif4g2	555.022	1668.34	-2.47886	9.11733e-09	eukaryotic translation initiation factor 4, gamma 2 [Source:MGI Symbol;Acc:MGI:109207]
ENSMUSG00000047126	Cltc	105.009	293.485	-2.47853	2.86759e-09	clathrin, heavy polypeptide (Hc) [Source:MGI Symbol;Acc:MGI:2388633]
ENSMUSG00000060716	Plekhh1	17.9089	54.7949	-2.47621	0.000486881	pleckstrin homology domain containing, family H (with MyTH4 domain) member 1 [Source:MGI Symbol;Acc:MGI:2144989]
ENSMUSG00000020538	Srebf1	10.4465	27.3342	-2.47176	0.0189324	sterol regulatory element binding transcription factor 1 [Source:MGI Symbol;Acc:MGI:107606]
ENSMUSG00000024827	Gldc	229.496	843.304	-2.47165	2.19013e-06	glycine decarboxylase [Source:MGI Symbol;Acc:MGI:1341155]
ENSMUSG00000004356	Utp20	33.9453	113.254	-2.47139	3.06105e-06	UTP20, small subunit (SSU) processome component, homolog (yeast) [Source:MGI Symbol;Acc:MGI:1917933]
ENSMUSG00000027547	Sall4	129.274	367.666	-2.4697	2.02813e-09	sal-like 4 (Drosophila) [Source:MGI Symbol;Acc:MGI:2139360]
ENSMUSG00000035614	Fam179b	7.9533	39.3236	-2.46528	0.00391516	family with sequence similarity 179, member B [Source:MGI Symbol;Acc:MGI:2684313]
ENSMUSG00000038843	Gcnt1	6.55141	22.5536	-2.46099	0.0284464	glucosaminyl (N-acetyl) transferase 1, core 2 [Source:MGI Symbol;Acc:MGI:95676]
ENSMUSG00000037315	Jade3	16.1626	43.3337	-2.45898	0.0092358	jade family PHD finger 3 [Source:MGI Symbol;Acc:MGI:2148019]
ENSMUSG00000029640	Usp12	11.0612	35.8217	-2.4554	0.0040557	ubiquitin specific peptidase 12 [Source:MGI Symbol;Acc:MGI:1270128]
ENSMUSG00000018428	Akap1	142.345	370.342	-2.45448	4.26665e-09	A kinase (PRKA) anchor protein 1 [Source:MGI Symbol;Acc:MGI:104729]
ENSMUSG00000027070	Lrp2	9.40282	27.7654	-2.44778	0.0285387	low density lipoprotein receptor-related protein 2 [Source:MGI Symbol;Acc:MGI:95794]
ENSMUSG00000039329	Tex19.1	47.7294	85.9835	-2.44632	1.88286e-05	testis expressed gene 19.1 [Source:MGI Symbol;Acc:MGI:1920929]
ENSMUSG00000032548	Slco2a1	20.2298	48.0853	-2.44538	0.00389354	solute carrier organic anion transporter family, member 2a1 [Source:MGI Symbol;Acc:MGI:1346021]
ENSMUSG00000032777	Gtf3c1	30.193	84.3811	-2.44114	0.000208547	general transcription factor III C 1 [Source:MGI Symbol;Acc:MGI:107887]
ENSMUSG00000022807	Osbpl11	45.0071	59.9735	-2.44094	4.75846e-05	oxysterol binding protein-like 11 [Source:MGI Symbol;Acc:MGI:2146553]
ENSMUSG00000037280	Galnt6	14.7797	60.5292	-2.43926	0.00161316	UDP-N-acetyl-alpha-D-galactosamine:polypeptide N-acetylgalactosaminyltransferase 6 [Source:MGI Symbol;Acc:MGI:1891640]
ENSMUSG00000034667	Xpot	195.065	493.062	-2.43737	2.86759e-09	exportin, tRNA (nuclear export receptor for tRNAs) [Source:MGI Symbol;Acc:MGI:1920442]
ENSMUSG00000034216	Vps18	26.2367	62.8446	-2.43684	9.27496e-05	vacuolar protein sorting 18 (yeast) [Source:MGI Symbol;Acc:MGI:2443626]
ENSMUSG00000030516	Tjp1	38.9783	114.348	-2.4361	6.47857e-06	tight junction protein 1 [Source:MGI Symbol;Acc:MGI:98759]
ENSMUSG00000026198	Abcb6	39.2673	116.573	-2.43528	0.00208297	ATP-binding cassette, sub-family B (MDR/TAP), member 6 [Source:MGI Symbol;Acc:MGI:1921354]
ENSMUSG00000052609	Plekhg3	6.96929	31.3467	-2.43425	0.0101143	pleckstrin homology domain containing, family G (with RhoGef domain) member 3 [Source:MGI Symbol;Acc:MGI:2388284]
ENSMUSG00000003992	Ssbp2	26.6841	6.14644	2.43149	0.00967168	single-stranded DNA binding protein 2 [Source:MGI Symbol;Acc:MGI:1914220]
ENSMUSG00000020721	Helz	24.7589	81.327	-2.42913	0.000124446	helicase with zinc finger domain [Source:MGI Symbol;Acc:MGI:1925705]
ENSMUSG00000037461	Ints7	41.5349	114.01	-2.42484	4.52518e-06	integrator complex subunit 7 [Source:MGI Symbol;Acc:MGI:1924315]
ENSMUSG00000025278	Flnb	78.0652	222.252	-2.42475	3.96743e-07	filamin, beta [Source:MGI Symbol;Acc:MGI:2446089]
ENSMUSG00000034247	Plekhm1	28.6944	102.479	-2.42282	1.67975e-05	pleckstrin homology domain containing, family M (with RUN domain) member 1 [Source:MGI Symbol;Acc:MGI:2443207]
ENSMUSG00000055874	Foxi3	16.6262	34.1819	-2.42179	0.0098575	forkhead box I3 [Source:MGI Symbol;Acc:MGI:3511278]
ENSMUSG00000034235	Usp54	7.60892	37.0922	-2.42134	0.00718651	ubiquitin specific peptidase 54 [Source:MGI Symbol;Acc:MGI:1926037]
ENSMUSG00000039652	Cpeb3	15.3413	45.4416	-2.42091	0.00260393	cytoplasmic polyadenylation element binding protein 3 [Source:MGI Symbol;Acc:MGI:2443075]
ENSMUSG00000053536	Cstf2t	29.177	64.1282	-2.41929	0.000332099	cleavage stimulation factor, 3' pre-RNA subunit 2, tau [Source:MGI Symbol;Acc:MGI:1932622]
ENSMUSG00000041219	Arhgap11a	31.3691	154.096	-2.4178	8.80859e-07	Rho GTPase activating protein 11A [Source:MGI Symbol;Acc:MGI:2444300]
ENSMUSG00000054808	Actn4	508.422	966.528	-2.41771	1.24692e-08	actinin alpha 4 [Source:MGI Symbol;Acc:MGI:1890773]
ENSMUSG00000074643	Cpne1	22.6762	94.3348	-2.4161	0.00010762	copine I [Source:MGI Symbol;Acc:MGI:2386621]
ENSMUSG00000005370	Msh6	90.2893	213.703	-2.41223	4.06114e-08	mutS homolog 6 (E. coli) [Source:MGI Symbol;Acc:MGI:1343961]
ENSMUSG00000051329	Nup160	57.0507	154.886	-2.41162	6.46379e-06	nucleoporin 160 [Source:MGI Symbol;Acc:MGI:1926227]
ENSMUSG00000020190	Mknk2	15.2644	42.3279	-2.4102	0.00178593	MAP kinase-interacting serine/threonine kinase 2 [Source:MGI Symbol;Acc:MGI:894279]
ENSMUSG00000029009	Mthfr	19.6446	73.9321	-2.40962	0.00191555	5,10-methylenetetrahydrofolate reductase [Source:MGI Symbol;Acc:MGI:106639]
ENSMUSG00000002957	Ap2a2	110.506	340.072	-2.4094	2.00833e-08	adaptor-related protein complex 2, alpha 2 subunit [Source:MGI Symbol;Acc:MGI:101920]
ENSMUSG00000027185	Nat10	39.0696	117.259	-2.40692	1.68352e-05	N-acetyltransferase 10 [Source:MGI Symbol;Acc:MGI:2138939]
ENSMUSG00000017119	Nbr1	55.3104	95.2169	-2.4068	1.01932e-05	neighbor of Brca1 gene 1 [Source:MGI Symbol;Acc:MGI:108498]
ENSMUSG00000097971	Gm26917	58.0361	228.43	-2.4052	4.21818e-06	predicted gene, 26917 [Source:MGI Symbol;Acc:MGI:5504032]
ENSMUSG00000024120	Lrpprc	69.0361	189.742	-2.39948	7.13403e-07	leucine-rich PPR-motif containing [Source:MGI Symbol;Acc:MGI:1919666]
ENSMUSG00000019866	Aim1	8.38121	24.0716	-2.39562	0.0308697	absent in melanoma 1 [Source:MGI Symbol;Acc:MGI:109544]
ENSMUSG00000020905	Usp43	10.8859	26.0765	-2.39555	0.0118225	ubiquitin specific peptidase 43 [Source:MGI Symbol;Acc:MGI:2444541]
ENSMUSG00000049553	Polr1a	78.0897	133.661	-2.39552	1.42854e-06	polymerase (RNA) I polypeptide A [Source:MGI Symbol;Acc:MGI:1096397]
ENSMUSG00000005621	Zfp592	26.0066	64.9844	-2.39548	0.000304624	zinc finger protein 592 [Source:MGI Symbol;Acc:MGI:2443541]
ENSMUSG00000051043	Gprc5c	54.6332	136.217	-2.39455	7.26264e-06	G protein-coupled receptor, family C, group 5, member C [Source:MGI Symbol;Acc:MGI:1917605]
ENSMUSG00000069833	Ahnak	10.4468	37.9638	-2.39273	0.0175695	AHNAK nucleoprotein (desmoyokin) [Source:MGI Symbol;Acc:MGI:1316648]
ENSMUSG00000029710	Ephb4	13.5345	23.0263	-2.39142	0.0206259	Eph receptor B4 [Source:MGI Symbol;Acc:MGI:104757]
ENSMUSG00000010751	Tnfrsf22	36.1731	182.279	-2.38756	4.86233e-06	tumor necrosis factor receptor superfamily, member 22 [Source:MGI Symbol;Acc:MGI:1930270]
ENSMUSG00000040565	Btaf1	17.3397	58.9011	-2.38479	0.000408061	BTAF1 RNA polymerase II, B-TFIID transcription factor-associated, (Mot1 homolog, S. cerevisiae) [Source:MGI Symbol;Acc:MGI:2147538]
ENSMUSG00000032127	Vps11	27.6551	63.1654	-2.38467	0.000254588	vacuolar protein sorting 11 (yeast) [Source:MGI Symbol;Acc:MGI:1918982]
ENSMUSG00000010205	Raver1	19.0386	38.5128	-2.3824	0.00234866	ribonucleoprotein, PTB-binding 1 [Source:MGI Symbol;Acc:MGI:1919016]
ENSMUSG00000019978	Epb4.1l2	18.3212	25.7963	-2.37999	0.00880184	erythrocyte protein band 4.1-like 2 [Source:MGI Symbol;Acc:MGI:103009]
ENSMUSG00000024773	Atg2a	75.4646	303.23	-2.37458	8.37232e-08	autophagy related 2A [Source:MGI Symbol;Acc:MGI:1916291]
ENSMUSG00000032812	Arap1	23.0233	62.937	-2.37334	0.000864707	ArfGAP with RhoGAP domain, ankyrin repeat and PH domain 1 [Source:MGI Symbol;Acc:MGI:1916960]
ENSMUSG00000004054	Map3k11	6.61993	24.6085	-2.36929	0.024027	mitogen-activated protein kinase kinase kinase 11 [Source:MGI Symbol;Acc:MGI:1346880]
ENSMUSG00000040548	Tex2	42.1743	103.585	-2.36821	2.09834e-05	testis expressed gene 2 [Source:MGI Symbol;Acc:MGI:102465]
ENSMUSG00000028833	Ncdn	20.2214	34.7445	-2.36557	0.00390091	neurochondrin [Source:MGI Symbol;Acc:MGI:1347351]
ENSMUSG00000002870	Mcm2	139.301	291.533	-2.35718	3.57825e-07	minichromosome maintenance deficient 2 mitotin (S. cerevisiae) [Source:MGI Symbol;Acc:MGI:105380]
ENSMUSG00000073434	Wdr90	11.2583	31.509	-2.35646	0.0113024	WD repeat domain 90 [Source:MGI Symbol;Acc:MGI:1921267]
ENSMUSG00000020282	Rhbdf1	17.1008	39.302	-2.35526	0.00461671	rhomboid family 1 (Drosophila) [Source:MGI Symbol;Acc:MGI:104328]
ENSMUSG00000048707	Tprn	81.893	211.353	-2.35448	1.11366e-07	taperin [Source:MGI Symbol;Acc:MGI:2139535]
ENSMUSG00000039087	Rreb1	64.998	175.857	-2.35447	2.03455e-06	ras responsive element binding protein 1 [Source:MGI Symbol;Acc:MGI:2443664]
ENSMUSG00000023055	Calcoco1	9.50249	17.9534	-2.35326	0.0428269	calcium binding and coiled coil domain 1 [Source:MGI Symbol;Acc:MGI:1914738]
ENSMUSG00000038369	Ncoa6	22.6762	65.1266	-2.3527	0.000240094	nuclear receptor coactivator 6 [Source:MGI Symbol;Acc:MGI:1929915]
ENSMUSG00000032536	Trak1	10.1872	50.3301	-2.3495	0.0091209	trafficking protein, kinesin binding 1 [Source:MGI Symbol;Acc:MGI:1914345]
ENSMUSG00000034101	Ctnnd1	74.0098	162.667	-2.34717	9.01178e-07	catenin (cadherin associated protein), delta 1 [Source:MGI Symbol;Acc:MGI:105100]
ENSMUSG00000064267	Hvcn1	22.9536	47.8451	-2.34603	0.000854938	hydrogen voltage-gated channel 1 [Source:MGI Symbol;Acc:MGI:1921346]
ENSMUSG00000034258	Mfsd7c	153.778	401.588	-2.3447	4.96335e-09	major facilitator superfamily domain containing 7C [Source:MGI Symbol;Acc:MGI:2384974]
ENSMUSG00000046324	Ermp1	33.455	85.2174	-2.34455	4.90018e-05	endoplasmic reticulum metallopeptidase 1 [Source:MGI Symbol;Acc:MGI:106250]
ENSMUSG00000031865	Dctn1	21.9315	88.0665	-2.34392	9.7751e-05	dynactin 1 [Source:MGI Symbol;Acc:MGI:107745]
ENSMUSG00000009470	Tnpo1	154.853	429.584	-2.34055	9.3781e-08	transportin 1 [Source:MGI Symbol;Acc:MGI:2681523]
ENSMUSG00000052299	Ltn1	30.5213	80.1182	-2.33691	0.000156201	listerin E3 ubiquitin protein ligase 1 [Source:MGI Symbol;Acc:MGI:1926163]
ENSMUSG00000020447	Npc1l1	21.2459	44.8438	-2.33463	0.0148571	NPC1-like 1 [Source:MGI Symbol;Acc:MGI:2685089]
ENSMUSG00000026638	Irf6	15.2447	21.6462	-2.33291	0.0263184	interferon regulatory factor 6 [Source:MGI Symbol;Acc:MGI:1859211]
ENSMUSG00000020741	Cluh	45.5541	131.767	-2.33062	1.01363e-05	clustered mitochondria (cluA/CLU1) homolog [Source:MGI Symbol;Acc:MGI:1921398]
ENSMUSG00000024955	Esrra	10.6571	32.8446	-2.33034	0.00816857	estrogen related receptor, alpha [Source:MGI Symbol;Acc:MGI:1346831]
ENSMUSG00000071477	Zfp777	21.363	39.4717	-2.32866	0.00448903	zinc finger protein 777 [Source:MGI Symbol;Acc:MGI:1919556]
ENSMUSG00000050244	Heatr1	73.0056	221.109	-2.3274	5.1442e-07	HEAT repeat containing 1 [Source:MGI Symbol;Acc:MGI:2442524]
ENSMUSG00000019731	Slc35e1	15.8202	65.3116	-2.32342	0.000425685	solute carrier family 35, member E1 [Source:MGI Symbol;Acc:MGI:2142403]
ENSMUSG00000025862	Stag2	460.007	1152.23	-2.31654	5.88216e-08	stromal antigen 2 [Source:MGI Symbol;Acc:MGI:1098583]
ENSMUSG00000038611	Phrf1	61.6424	139.408	-2.31553	2.70216e-06	PHD and ring finger domains 1 [Source:MGI Symbol;Acc:MGI:2141847]
ENSMUSG00000067352	Gm14149	31.6576	7.60114	2.31516	0.00833995	predicted gene 14149 [Source:MGI Symbol;Acc:MGI:3651549]
ENSMUSG00000040383	Aqr	44.7762	78.1244	-2.31352	2.78828e-05	aquarius [Source:MGI Symbol;Acc:MGI:1276102]
ENSMUSG00000053113	Socs3	136.245	271.448	-2.30421	5.79966e-07	suppressor of cytokine signaling 3 [Source:MGI Symbol;Acc:MGI:1201791]
ENSMUSG00000039713	Plekhg5	18.3153	51.7522	-2.30411	0.00387077	pleckstrin homology domain containing, family G (with RhoGef domain) member 5 [Source:MGI Symbol;Acc:MGI:2652860]
ENSMUSG00000024294	Mib1	23.0457	38.2661	-2.30379	0.0162437	mindbomb homolog 1 (Drosophila) [Source:MGI Symbol;Acc:MGI:2443157]
ENSMUSG00000031833	Mast3	27.5056	47.3887	-2.30112	0.0018247	microtubule associated serine/threonine kinase 3 [Source:MGI Symbol;Acc:MGI:2683541]
ENSMUSG00000046733	Gprc5a	20.6924	44.2755	-2.29893	0.00151811	G protein-coupled receptor, family C, group 5, member A [Source:MGI Symbol;Acc:MGI:1891250]
ENSMUSG00000039840	Epg5	5.17742	22.3987	-2.29778	0.0381145	ectopic P-granules autophagy protein 5 homolog (C. elegans) [Source:MGI Symbol;Acc:MGI:1918673]
ENSMUSG00000034342	Cbl	12.3125	61.159	-2.29379	0.00140975	Casitas B-lineage lymphoma [Source:MGI Symbol;Acc:MGI:88279]
ENSMUSG00000031378	Abcd1	12.2108	19.5835	-2.29292	0.049349	ATP-binding cassette, sub-family D (ALD), member 1 [Source:MGI Symbol;Acc:MGI:1349215]
ENSMUSG00000001173	Ocrl	38.1708	101.788	-2.27798	7.13713e-05	oculocerebrorenal syndrome of Lowe [Source:MGI Symbol;Acc:MGI:109589]
ENSMUSG00000008604	Ubqln4	9.85834	24.27	-2.27423	0.0265518	ubiquilin 4 [Source:MGI Symbol;Acc:MGI:2150152]
ENSMUSG00000021775	Nr1d2	30.103	74.3942	-2.27383	0.000114247	nuclear receptor subfamily 1, group D, member 2 [Source:MGI Symbol;Acc:MGI:2449205]
ENSMUSG00000041879	Ipo9	47.0192	76.5709	-2.2728	4.33111e-05	importin 9 [Source:MGI Symbol;Acc:MGI:1918944]
ENSMUSG00000057342	Sphk2	5.18383	24.1957	-2.272	0.0428269	sphingosine kinase 2 [Source:MGI Symbol;Acc:MGI:1861380]
ENSMUSG00000024908	Ppp6r3	94.1091	245.496	-2.27118	2.06695e-07	protein phosphatase 6, regulatory subunit 3 [Source:MGI Symbol;Acc:MGI:1921807]
ENSMUSG00000030213	Atf7ip	36.3493	81.1844	-2.26889	8.29322e-05	activating transcription factor 7 interacting protein [Source:MGI Symbol;Acc:MGI:1858965]
ENSMUSG00000026478	Lamc1	13.2207	27.1702	-2.26881	0.0154638	laminin, gamma 1 [Source:MGI Symbol;Acc:MGI:99914]
ENSMUSG00000027198	Ext2	12.729	29.5086	-2.26681	0.0110054	exostoses (multiple) 2 [Source:MGI Symbol;Acc:MGI:108050]
ENSMUSG00000052296	Ppp6r1	45.6813	106.098	-2.26438	2.20872e-05	protein phosphatase 6, regulatory subunit 1 [Source:MGI Symbol;Acc:MGI:2442163]
ENSMUSG00000048661	Lemd3	48.796	132.771	-2.25956	6.38493e-06	LEM domain containing 3 [Source:MGI Symbol;Acc:MGI:3580376]
ENSMUSG00000042978	Sbk1	7.47227	31.8648	-2.25803	0.04332	SH3-binding kinase 1 [Source:MGI Symbol;Acc:MGI:2135937]
ENSMUSG00000054693	Adam10	12.6361	50.4154	-2.25802	0.0175695	a disintegrin and metallopeptidase domain 10 [Source:MGI Symbol;Acc:MGI:109548]
ENSMUSG00000031951	Tmem231	23.1343	56.639	-2.25774	0.00218338	transmembrane protein 231 [Source:MGI Symbol;Acc:MGI:2685024]
ENSMUSG00000039523	Cep104	8.39773	32.2195	-2.25528	0.0141722	centrosomal protein 104 [Source:MGI Symbol;Acc:MGI:2687282]
ENSMUSG00000030835	Nomo1	31.1362	87.9127	-2.25187	7.04092e-05	nodal modulator 1 [Source:MGI Symbol;Acc:MGI:2385850]
ENSMUSG00000034714	Ttyh2	76.4326	147.534	-2.25121	2.29658e-06	tweety homolog 2 (Drosophila) [Source:MGI Symbol;Acc:MGI:2157091]
ENSMUSG00000026924	Sec16a	26.6637	84.3065	-2.24974	0.000155536	SEC16 homolog A (S. cerevisiae) [Source:MGI Symbol;Acc:MGI:2139207]
ENSMUSG00000062038	Gm10108	46.7634	12.0271	2.2478	0.00137383	predicted pseudogene 10108 [Source:MGI Symbol;Acc:MGI:3642431]
ENSMUSG00000041037	Irgq	15.1081	76.9435	-2.24694	0.000241261	immunity-related GTPase family, Q [Source:MGI Symbol;Acc:MGI:2667176]
ENSMUSG00000024960	Plcb3	25.831	46.3499	-2.24553	0.00161316	phospholipase C, beta 3 [Source:MGI Symbol;Acc:MGI:104778]
ENSMUSG00000025228	Actr1a	46.9739	129.825	-2.24417	5.6639e-05	ARP1 actin-related protein 1A, centractin alpha [Source:MGI Symbol;Acc:MGI:1858964]
ENSMUSG00000006673	Qrich1	60.7809	158.521	-2.24076	4.33707e-06	glutamine-rich 1 [Source:MGI Symbol;Acc:MGI:1916482]
ENSMUSG00000022999	Lmbr1l	17.6024	47.7355	-2.23707	0.00185661	limb region 1 like [Source:MGI Symbol;Acc:MGI:1289247]
ENSMUSG00000071652	Ints5	23.4647	36.8245	-2.23589	0.00333732	integrator complex subunit 5 [Source:MGI Symbol;Acc:MGI:1923578]
ENSMUSG00000014444	Piezo1	18.0728	53.5116	-2.23577	0.00241648	piezo-type mechanosensitive ion channel component 1 [Source:MGI Symbol;Acc:MGI:3603204]
ENSMUSG00000054321	Taf4b	40.7023	124.039	-2.23515	5.49948e-05	TAF4B RNA polymerase II, TATA box binding protein (TBP)-associated factor [Source:MGI Symbol;Acc:MGI:2152345]
ENSMUSG00000063804	Lin28b	9.38324	18.4965	-2.2329	0.0455553	lin-28 homolog B (C. elegans) [Source:MGI Symbol;Acc:MGI:3584032]
ENSMUSG00000024622	Hmgxb3	19.9984	64.4089	-2.23282	0.000675449	HMG box domain containing 3 [Source:MGI Symbol;Acc:MGI:2441817]
ENSMUSG00000060985	Tdrd5	34.3303	49.5792	-2.22952	0.00103577	tudor domain containing 5 [Source:MGI Symbol;Acc:MGI:2684949]
ENSMUSG00000020850	Prpf8	94.0314	254.243	-2.22942	7.23843e-07	pre-mRNA processing factor 8 [Source:MGI Symbol;Acc:MGI:2179381]
ENSMUSG00000047501	Cldn4	85.2228	209.856	-2.22898	8.80859e-07	claudin 4 [Source:MGI Symbol;Acc:MGI:1313314]
ENSMUSG00000037465	Klf10	61.8888	200.024	-2.22818	6.8141e-06	Kruppel-like factor 10 [Source:MGI Symbol;Acc:MGI:1101353]
ENSMUSG00000032228	Tcf12	5.04744	27.929	-2.22573	0.0311834	transcription factor 12 [Source:MGI Symbol;Acc:MGI:101877]
ENSMUSG00000025579	Gaa	214.168	559.192	-2.22547	4.18712e-08	glucosidase, alpha, acid [Source:MGI Symbol;Acc:MGI:95609]
ENSMUSG00000018604	Tbx3	178.875	466.801	-2.22531	2.64548e-08	T-box 3 [Source:MGI Symbol;Acc:MGI:98495]
ENSMUSG00000030513	Pcsk6	15.3839	34.0912	-2.22495	0.0177078	proprotein convertase subtilisin/kexin type 6 [Source:MGI Symbol;Acc:MGI:102897]
ENSMUSG00000017802	Fam134c	32.2212	87.8081	-2.22494	8.55057e-05	family with sequence similarity 134, member C [Source:MGI Symbol;Acc:MGI:1915248]
ENSMUSG00000040389	Wdr47	12.5091	40.2797	-2.22416	0.0199581	WD repeat domain 47 [Source:MGI Symbol;Acc:MGI:2139593]
ENSMUSG00000070047	Fat1	9.54652	32.1384	-2.22341	0.0208869	FAT tumor suppressor homolog 1 (Drosophila) [Source:MGI Symbol;Acc:MGI:109168]
ENSMUSG00000039191	Rbpj	12.0607	81.7886	-2.21856	0.00185661	recombination signal binding protein for immunoglobulin kappa J region [Source:MGI Symbol;Acc:MGI:96522]
ENSMUSG00000031902	Nfatc3	37.0841	65.357	-2.21779	0.000608102	nuclear factor of activated T cells, cytoplasmic, calcineurin dependent 3 [Source:MGI Symbol;Acc:MGI:103296]
ENSMUSG00000057101	Zfp180	24.9866	57.8665	-2.21447	0.00186321	zinc finger protein 180 [Source:MGI Symbol;Acc:MGI:1923701]
ENSMUSG00000033323	Ctdp1	26.8069	107.663	-2.21415	3.09462e-05	CTD (carboxy-terminal domain, RNA polymerase II, polypeptide A) phosphatase, subunit 1 [Source:MGI Symbol;Acc:MGI:1926953]
ENSMUSG00000059890	Ube4a	33.6204	54.1858	-2.21366	0.00253633	ubiquitination factor E4A [Source:MGI Symbol;Acc:MGI:2154580]
ENSMUSG00000034973	Dopey1	5.78045	22.1909	-2.20962	0.0462898	dopey family member 1 [Source:MGI Symbol;Acc:MGI:1289294]
ENSMUSG00000034858	Fam214a	19.8468	51.0209	-2.20729	0.00615556	family with sequence similarity 214, member A [Source:MGI Symbol;Acc:MGI:2387648]
ENSMUSG00000000420	Galnt1	27.229	70.3573	-2.20527	0.000324177	UDP-N-acetyl-alpha-D-galactosamine:polypeptide N-acetylgalactosaminyltransferase 1 [Source:MGI Symbol;Acc:MGI:894693]
ENSMUSG00000043131	Mob1a	65.2864	144.41	-2.20409	5.35715e-06	MOB kinase activator 1A [Source:MGI Symbol;Acc:MGI:2442631]
ENSMUSG00000035545	Leng8	17.5199	35.5245	-2.20334	0.00886554	leukocyte receptor cluster (LRC) member 8 [Source:MGI Symbol;Acc:MGI:2142195]
ENSMUSG00000020917	Acly	96.5308	203.417	-2.20062	5.82954e-07	ATP citrate lyase [Source:MGI Symbol;Acc:MGI:103251]
ENSMUSG00000031010	Usp9x	41.5995	161.641	-2.20048	3.95567e-05	ubiquitin specific peptidase 9, X chromosome [Source:MGI Symbol;Acc:MGI:894681]
ENSMUSG00000063952	Brpf3	10.3288	56.1239	-2.19907	0.00277601	bromodomain and PHD finger containing, 3 [Source:MGI Symbol;Acc:MGI:2146836]
ENSMUSG00000086598	Btbd18	23.6357	43.8725	-2.19344	0.0027822	BTB (POZ) domain containing 18 [Source:MGI Symbol;Acc:MGI:3650217]
ENSMUSG00000068101	Cenpm	26.5836	7.43455	2.19308	0.0199408	centromere protein M [Source:MGI Symbol;Acc:MGI:1913820]
ENSMUSG00000031563	Wwc2	90.4868	230.195	-2.19013	1.13881e-05	WW, C2 and coiled-coil domain containing 2 [Source:MGI Symbol;Acc:MGI:1261872]
ENSMUSG00000015461	Atf6b	45.4265	50.7296	-2.18879	0.00049072	activating transcription factor 6 beta [Source:MGI Symbol;Acc:MGI:105121]
ENSMUSG00000028412	Slc44a1	34.92	79.706	-2.18863	0.00129431	solute carrier family 44, member 1 [Source:MGI Symbol;Acc:MGI:2140592]
ENSMUSG00000030816	Rnf40	37.8153	104.638	-2.18681	5.91649e-05	ring finger protein 40 [Source:MGI Symbol;Acc:MGI:2142048]
ENSMUSG00000059995	Atxn7l3	12.5375	32.4917	-2.1864	0.0118629	ataxin 7-like 3 [Source:MGI Symbol;Acc:MGI:3036270]
ENSMUSG00000094568	Gm1815	30.0426	8.23158	2.18594	0.0149943	predicted gene 1815 [Source:MGI Symbol;Acc:MGI:3037673]
ENSMUSG00000029781	Fkbp9	24.5008	61.8648	-2.18449	0.00105724	FK506 binding protein 9 [Source:MGI Symbol;Acc:MGI:1350921]
ENSMUSG00000038615	Nfe2l1	44.4965	90.2458	-2.18384	0.000114271	nuclear factor, erythroid derived 2,-like 1 [Source:MGI Symbol;Acc:MGI:99421]
ENSMUSG00000026669	Mcm10	135.139	238.022	-2.18277	4.49293e-07	minichromosome maintenance deficient 10 (S. cerevisiae) [Source:MGI Symbol;Acc:MGI:1917274]
ENSMUSG00000027860	Vangl1	23.0696	39.5919	-2.18151	0.00481189	vang-like 1 (van gogh, Drosophila) [Source:MGI Symbol;Acc:MGI:2159344]
ENSMUSG00000035311	Gnptab	88.2725	210.476	-2.17957	2.82264e-06	N-acetylglucosamine-1-phosphate transferase, alpha and beta subunits [Source:MGI Symbol;Acc:MGI:3643902]
ENSMUSG00000070306	Ccdc153	37.8209	8.48509	2.17939	0.040179	coiled-coil domain containing 153 [Source:MGI Symbol;Acc:MGI:2448587]
ENSMUSG00000039959	Hip1	59.1163	192.798	-2.17882	2.78828e-05	huntingtin interacting protein 1 [Source:MGI Symbol;Acc:MGI:1099804]
ENSMUSG00000028796	Phc2	10.481	28.9737	-2.17822	0.0235865	polyhomeotic-like 2 (Drosophila) [Source:MGI Symbol;Acc:MGI:1860454]
ENSMUSG00000013629	Cad	109.945	343.591	-2.17703	2.77253e-07	carbamoyl-phosphate synthetase 2, aspartate transcarbamylase, and dihydroorotase [Source:MGI Symbol;Acc:MGI:1916969]
ENSMUSG00000028433	Ubap2	129.229	280.705	-2.17684	1.58975e-07	ubiquitin-associated protein 2 [Source:MGI Symbol;Acc:MGI:1916176]
ENSMUSG00000024019	Cmtr1	31.8798	91.1701	-2.17476	0.000513723	cap methyltransferase 1 [Source:MGI Symbol;Acc:MGI:1921407]
ENSMUSG00000029381	Shroom3	14.3881	48.947	-2.17323	0.00326657	shroom family member 3 [Source:MGI Symbol;Acc:MGI:1351655]
ENSMUSG00000052488	Cherp	54.5525	147.058	-2.17191	2.8794e-05	calcium homeostasis endoplasmic reticulum protein [Source:MGI Symbol;Acc:MGI:106417]
ENSMUSG00000035529	Prdm4	26.718	70.2728	-2.17077	0.000374023	PR domain containing 4 [Source:MGI Symbol;Acc:MGI:1920093]
ENSMUSG00000029202	Pds5a	14.5219	53.7256	-2.16957	0.0018779	PDS5, regulator of cohesion maintenance, homolog A (S. cerevisiae) [Source:MGI Symbol;Acc:MGI:1918771]
ENSMUSG00000037253	Mex3c	38.8436	107.652	-2.16684	0.000389865	mex3 homolog C (C. elegans) [Source:MGI Symbol;Acc:MGI:2652843]
ENSMUSG00000045983	Eif4g1	230.021	680.493	-2.16637	3.86175e-08	eukaryotic translation initiation factor 4, gamma 1 [Source:MGI Symbol;Acc:MGI:2384784]
ENSMUSG00000068184	Ndufaf2	28.1835	7.57255	2.16476	0.0153101	NADH dehydrogenase (ubiquinone) 1 alpha subcomplex, assembly factor 2 [Source:MGI Symbol;Acc:MGI:1922847]
ENSMUSG00000020802	Ube2o	36.9268	79.3821	-2.16115	0.000240474	ubiquitin-conjugating enzyme E2O [Source:MGI Symbol;Acc:MGI:2444266]
ENSMUSG00000038429	Usp5	115.342	188.227	-2.16046	8.80859e-07	ubiquitin specific peptidase 5 (isopeptidase T) [Source:MGI Symbol;Acc:MGI:1347343]
ENSMUSG00000023026	Dip2b	9.48621	27.1219	-2.16029	0.0230801	DIP2 disco-interacting protein 2 homolog B (Drosophila) [Source:MGI Symbol;Acc:MGI:2145977]
ENSMUSG00000000134	Tfe3	25.2214	57.0733	-2.1602	0.00335769	transcription factor E3 [Source:MGI Symbol;Acc:MGI:98511]
ENSMUSG00000038991	Txndc5	15.2776	23.1295	-2.15922	0.0413859	thioredoxin domain containing 5 [Source:MGI Symbol;Acc:MGI:2145316]
ENSMUSG00000086503	Xist	120.435	283.001	-2.15579	0.0230307	inactive X specific transcripts [Source:MGI Symbol;Acc:MGI:98974]
ENSMUSG00000039738	Slx4	13.268	30.1903	-2.15401	0.023573	SLX4 structure-specific endonuclease subunit homolog (S. cerevisiae) [Source:MGI Symbol;Acc:MGI:106299]
ENSMUSG00000020918	Kat2a	36.6232	86.541	-2.15246	0.000114271	K(lysine) acetyltransferase 2A [Source:MGI Symbol;Acc:MGI:1343101]
ENSMUSG00000032570	Atp2c1	21.0851	39.5158	-2.15138	0.0124944	ATPase, Ca++-sequestering [Source:MGI Symbol;Acc:MGI:1889008]
ENSMUSG00000050211	Pla2g4e	42.924	82.6676	-2.15117	0.00010076	phospholipase A2, group IVE [Source:MGI Symbol;Acc:MGI:1919144]
ENSMUSG00000028948	Nol9	101.965	202.942	-2.14784	4.7237e-07	nucleolar protein 9 [Source:MGI Symbol;Acc:MGI:1921285]
ENSMUSG00000002319	Ipo4	106.23	317.238	-2.14728	1.6791e-06	importin 4 [Source:MGI Symbol;Acc:MGI:1923001]
ENSMUSG00000038774	Ascc3	39.6408	99.0417	-2.14384	0.000295694	activating signal cointegrator 1 complex subunit 3 [Source:MGI Symbol;Acc:MGI:1925237]
ENSMUSG00000002897	Il17ra	12.1693	30.8533	-2.14242	0.0233126	interleukin 17 receptor A [Source:MGI Symbol;Acc:MGI:107399]
ENSMUSG00000021357	Exoc2	20.076	30.0075	-2.14171	0.0108029	exocyst complex component 2 [Source:MGI Symbol;Acc:MGI:1913732]
ENSMUSG00000032193	Ldlr	21.9858	40.7828	-2.14133	0.0116509	low density lipoprotein receptor [Source:MGI Symbol;Acc:MGI:96765]
ENSMUSG00000033004	Mycbp2	25.9515	49.375	-2.13893	0.0105489	MYC binding protein 2 [Source:MGI Symbol;Acc:MGI:2179432]
ENSMUSG00000028381	Ugcg	317.742	901.73	-2.13576	2.23115e-06	UDP-glucose ceramide glucosyltransferase [Source:MGI Symbol;Acc:MGI:1332243]
ENSMUSG00000038685	Rtel1	52.5151	141.127	-2.13433	1.07395e-05	regulator of telomere elongation helicase 1 [Source:MGI Symbol;Acc:MGI:2139369]
ENSMUSG00000034333	Zbed4	33.3764	100.525	-2.13425	0.000295694	zinc finger, BED domain containing 4 [Source:MGI Symbol;Acc:MGI:2682302]
ENSMUSG00000005417	Mprip	27.6503	107.065	-2.13419	7.94808e-05	myosin phosphatase Rho interacting protein [Source:MGI Symbol;Acc:MGI:1349438]
ENSMUSG00000042492	Tbc1d10b	30.8874	67.4253	-2.13262	0.000780365	TBC1 domain family, member 10b [Source:MGI Symbol;Acc:MGI:1915699]
ENSMUSG00000022536	Glyr1	76.0189	175.449	-2.1321	7.73503e-06	glyoxylate reductase 1 homolog (Arabidopsis) [Source:MGI Symbol;Acc:MGI:1921272]
ENSMUSG00000079190		31.1355	9.23391	2.12812	0.0487188
ENSMUSG00000029512	Ulk1	206.131	577.885	-2.1278	3.07926e-07	unc-51 like kinase 1 [Source:MGI Symbol;Acc:MGI:1270126]
ENSMUSG00000012640	Zfp715	10.7628	34.3448	-2.12734	0.0131906	zinc finger protein 715 [Source:MGI Symbol;Acc:MGI:1917180]
ENSMUSG00000024858	Adrbk1	8.79593	26.4512	-2.12627	0.0314632	adrenergic receptor kinase, beta 1 [Source:MGI Symbol;Acc:MGI:87940]
ENSMUSG00000018398	Sept8	20.454	48.6343	-2.12625	0.00228744	septin 8 [Source:MGI Symbol;Acc:MGI:894310]
ENSMUSG00000046157	Tmem229b	63.2167	87.6958	-2.12623	0.00085789	transmembrane protein 229B [Source:MGI Symbol;Acc:MGI:2444389]
ENSMUSG00000036986	Pml	27.1908	49.1759	-2.12274	0.00295989	promyelocytic leukemia [Source:MGI Symbol;Acc:MGI:104662]
ENSMUSG00000029676	Pot1a	19.2481	40.8934	-2.11971	0.00615556	protection of telomeres 1A [Source:MGI Symbol;Acc:MGI:2141503]
ENSMUSG00000051786	Tubgcp6	19.1828	33.5864	-2.118	0.00925793	tubulin, gamma complex associated protein 6 [Source:MGI Symbol;Acc:MGI:2146071]
ENSMUSG00000018449	Rpain	42.4622	13.1013	2.11725	0.00420775	RPA interacting protein [Source:MGI Symbol;Acc:MGI:1916973]
ENSMUSG00000024968	Rcor2	15.7723	32.0594	-2.11702	0.0161562	REST corepressor 2 [Source:MGI Symbol;Acc:MGI:1859854]
ENSMUSG00000041961	Znrf3	14.5316	18.1221	-2.11677	0.0396674	zinc and ring finger 3 [Source:MGI Symbol;Acc:MGI:3039616]
ENSMUSG00000038844	Kif16b	10.1187	30.0146	-2.11591	0.0216468	kinesin family member 16B [Source:MGI Symbol;Acc:MGI:1098240]
ENSMUSG00000079262	Slco1a6	22.7107	6.06183	2.11419	0.0419269	solute carrier organic anion transporter family, member 1a6 [Source:MGI Symbol;Acc:MGI:1351906]
ENSMUSG00000057738	Sptan1	83.6913	259.525	-2.11375	1.31347e-05	spectrin alpha, non-erythrocytic 1 [Source:MGI Symbol;Acc:MGI:98386]
ENSMUSG00000034088	Hdlbp	228.32	450.221	-2.11109	7.21706e-07	high density lipoprotein (HDL) binding protein [Source:MGI Symbol;Acc:MGI:99256]
ENSMUSG00000020290	Xpo1	84.8529	273.485	-2.11097	3.1236e-06	exportin 1, CRM1 homolog (yeast) [Source:MGI Symbol;Acc:MGI:2144013]
ENSMUSG00000029434	Vps33a	35.434	95.4812	-2.10755	0.00010844	vacuolar protein sorting 33A (yeast) [Source:MGI Symbol;Acc:MGI:1924823]
ENSMUSG00000058454	Dhcr7	21.1054	42.3615	-2.10327	0.00521768	7-dehydrocholesterol reductase [Source:MGI Symbol;Acc:MGI:1298378]
ENSMUSG00000038587	Akap12	37.633	39.4032	-2.09613	0.00397085	A kinase (PRKA) anchor protein (gravin) 12 [Source:MGI Symbol;Acc:MGI:1932576]
ENSMUSG00000010936	Vac14	26.3953	47.8033	-2.09523	0.0109736	Vac14 homolog (S. cerevisiae) [Source:MGI Symbol;Acc:MGI:2157980]
ENSMUSG00000025240	Sacm1l	9.17068	28.5049	-2.09449	0.0369768	SAC1 (suppressor of actin mutations 1, homolog)-like (S. cerevisiae) [Source:MGI Symbol;Acc:MGI:1933169]
ENSMUSG00000051527	Usp29	19.701	52.8261	-2.09402	0.00293408	ubiquitin specific peptidase 29 [Source:MGI Symbol;Acc:MGI:1888998]
ENSMUSG00000025199	Chuk	15.7661	49.7913	-2.09307	0.00397085	conserved helix-loop-helix ubiquitous kinase [Source:MGI Symbol;Acc:MGI:99484]
ENSMUSG00000090877	Hspa1b	24.8494	48.4684	-2.09262	0.00265962	heat shock protein 1B [Source:MGI Symbol;Acc:MGI:99517]
ENSMUSG00000029787	Avl9	64.2	139.06	-2.09259	8.58015e-05	AVL9 homolog (S. cerevisiase) [Source:MGI Symbol;Acc:MGI:1926187]
ENSMUSG00000094614	Gm21769	50.1316	79.8365	-2.09175	0.000610148	predicted gene, 21769 [Source:MGI Symbol;Acc:MGI:5433933]
ENSMUSG00000003660	Snrnp200	80.2725	198.001	-2.09173	5.27207e-05	small nuclear ribonucleoprotein 200 (U5) [Source:MGI Symbol;Acc:MGI:2444401]
ENSMUSG00000027395	Polr1b	122.687	245.401	-2.09156	7.66997e-07	polymerase (RNA) I polypeptide B [Source:MGI Symbol;Acc:MGI:108014]
ENSMUSG00000024182	Axin1	35.3057	97.4712	-2.0911	0.000981	axin 1 [Source:MGI Symbol;Acc:MGI:1096327]
ENSMUSG00000026116	Tmem131	11.3223	29.7368	-2.0881	0.0279924	transmembrane protein 131 [Source:MGI Symbol;Acc:MGI:1927110]
ENSMUSG00000037022	Mmaa	52.4237	16.1522	2.08794	0.00159555	methylmalonic aciduria (cobalamin deficiency) type A [Source:MGI Symbol;Acc:MGI:1923805]
ENSMUSG00000050071	Bex1	21.0657	58.0093	-2.0872	0.00926824	brain expressed gene 1 [Source:MGI Symbol;Acc:MGI:1328321]
ENSMUSG00000035941	Ibtk	61.5023	172.49	-2.0777	5.6639e-05	inhibitor of Bruton agammaglobulinemia tyrosine kinase [Source:MGI Symbol;Acc:MGI:1918677]
ENSMUSG00000022914	Brwd1	70.0737	229.852	-2.07535	7.26264e-06	bromodomain and WD repeat domain containing 1 [Source:MGI Symbol;Acc:MGI:1890651]
ENSMUSG00000039367	Sec24c	70.2797	155.683	-2.07431	2.06589e-05	Sec24 related gene family, member C (S. cerevisiae) [Source:MGI Symbol;Acc:MGI:1919746]
ENSMUSG00000031161	Hdac6	55.8157	106.85	-2.07426	7.96428e-05	histone deacetylase 6 [Source:MGI Symbol;Acc:MGI:1333752]
ENSMUSG00000032120	C2cd2l	45.0107	128.185	-2.07272	6.5207e-05	C2 calcium-dependent domain containing 2-like [Source:MGI Symbol;Acc:MGI:1919014]
ENSMUSG00000005397	Nid1	132.817	150.394	-2.07249	1.20415e-05	nidogen 1 [Source:MGI Symbol;Acc:MGI:97342]
ENSMUSG00000028991	Mtor	8.75436	23.434	-2.07066	0.0433509	mechanistic target of rapamycin (serine/threonine kinase) [Source:MGI Symbol;Acc:MGI:1928394]
ENSMUSG00000041215	Yeats2	12.4934	26.1879	-2.06941	0.0460677	YEATS domain containing 2 [Source:MGI Symbol;Acc:MGI:2447762]
ENSMUSG00000000605	Clcn4-2	10.8121	40.3361	-2.06881	0.0169978	chloride channel 4-2 [Source:MGI Symbol;Acc:MGI:104571]
ENSMUSG00000021890	Eaf1	49.5448	96.8119	-2.06862	0.000720911	ELL associated factor 1 [Source:MGI Symbol;Acc:MGI:1921677]
ENSMUSG00000031328	Flna	18.9012	72.15	-2.06833	0.00136099	filamin, alpha [Source:MGI Symbol;Acc:MGI:95556]
ENSMUSG00000101188		179.34	315.352	-2.06785	5.38223e-07
ENSMUSG00000032594	Ip6k1	14.4596	39.7054	-2.0674	0.0130126	inositol hexaphosphate kinase 1 [Source:MGI Symbol;Acc:MGI:1351633]
ENSMUSG00000034022	Cpsf1	85.4172	139.099	-2.06587	5.54319e-05	cleavage and polyadenylation specific factor 1 [Source:MGI Symbol;Acc:MGI:2679722]
ENSMUSG00000000538	Tom1l2	29.747	43.1827	-2.065	0.0240478	target of myb1-like 2 (chicken) [Source:MGI Symbol;Acc:MGI:2443306]
ENSMUSG00000039834	Zfp335	28.3372	75.362	-2.06408	0.0011364	zinc finger protein 335 [Source:MGI Symbol;Acc:MGI:2682313]
ENSMUSG00000020962	Gtf2a1	21.7572	79.6802	-2.0586	0.00191555	general transcription factor II A, 1 [Source:MGI Symbol;Acc:MGI:1933277]
ENSMUSG00000047098	Rnf31	8.77728	28.9484	-2.05445	0.0308626	ring finger protein 31 [Source:MGI Symbol;Acc:MGI:1934704]
ENSMUSG00000000149	Gna12	18.3114	22.7611	-2.05435	0.034814	guanine nucleotide binding protein, alpha 12 [Source:MGI Symbol;Acc:MGI:95767]
ENSMUSG00000057177	Gsk3a	18.5713	31.6659	-2.05365	0.0142934	glycogen synthase kinase 3 alpha [Source:MGI Symbol;Acc:MGI:2152453]
ENSMUSG00000018678	Sp2	12.2911	23.7243	-2.05142	0.040367	Sp2 transcription factor [Source:MGI Symbol;Acc:MGI:1926162]
ENSMUSG00000014932	Yes1	10.5355	37.4584	-2.0511	0.0199581	Yamaguchi sarcoma viral (v-yes) oncogene homolog 1 [Source:MGI Symbol;Acc:MGI:99147]
ENSMUSG00000030201	Lrp6	6.15281	30.0335	-2.05078	0.0367122	low density lipoprotein receptor-related protein 6 [Source:MGI Symbol;Acc:MGI:1298218]
ENSMUSG00000031976	Urb2	33.1377	64.3153	-2.05059	0.000987479	URB2 ribosome biogenesis 2 homolog (S. cerevisiae) [Source:MGI Symbol;Acc:MGI:2681124]
ENSMUSG00000025145	Lrrc45	13.0397	19.3261	-2.0499	0.0454888	leucine rich repeat containing 45 [Source:MGI Symbol;Acc:MGI:2387183]
ENSMUSG00000046985	Tapt1	19.2314	40.1286	-2.04888	0.0139309	transmembrane anterior posterior transformation 1 [Source:MGI Symbol;Acc:MGI:2683537]
ENSMUSG00000024735	Prpf19	63.8105	101.427	-2.04778	0.000140712	PRP19/PSO4 pre-mRNA processing factor 19 homolog (S. cerevisiae) [Source:MGI Symbol;Acc:MGI:106247]
ENSMUSG00000035673	Sbno2	16.3057	44.902	-2.04541	0.00699139	strawberry notch homolog 2 (Drosophila) [Source:MGI Symbol;Acc:MGI:2448490]
ENSMUSG00000094777	Hist1h2ap	170.833	282.069	-2.04304	0.0104391	histone cluster 1, H2ap [Source:MGI Symbol;Acc:MGI:3710573]
ENSMUSG00000020790	Ankfy1	35.2618	75.4449	-2.03947	0.000397806	ankyrin repeat and FYVE domain containing 1 [Source:MGI Symbol;Acc:MGI:1337008]
ENSMUSG00000029188	Slc34a2	124.837	235.506	-2.03901	3.06105e-06	solute carrier family 34 (sodium phosphate), member 2 [Source:MGI Symbol;Acc:MGI:1342284]
ENSMUSG00000026819	Slc25a25	31.0749	83.5243	-2.03882	0.000325985	solute carrier family 25 (mitochondrial carrier, phosphate carrier), member 25 [Source:MGI Symbol;Acc:MGI:1915913]
ENSMUSG00000018068	Ints2	32.4769	56.6446	-2.03637	0.0102887	integrator complex subunit 2 [Source:MGI Symbol;Acc:MGI:1917672]
ENSMUSG00000026959	Grin1	56.312	126.174	-2.03622	0.00038784	glutamate receptor, ionotropic, NMDA1 (zeta 1) [Source:MGI Symbol;Acc:MGI:95819]
ENSMUSG00000028278	Rragd	147.657	521.191	-2.03297	4.20942e-05	Ras-related GTP binding D [Source:MGI Symbol;Acc:MGI:1098604]
ENSMUSG00000031788	Kifc3	53.8301	144.712	-2.03194	9.36416e-05	kinesin family member C3 [Source:MGI Symbol;Acc:MGI:109202]
ENSMUSG00000047213	Ythdf3	34.3571	78.9997	-2.0317	0.00319492	YTH domain family 3 [Source:MGI Symbol;Acc:MGI:1918850]
ENSMUSG00000054753	AU018091	158.988	487.147	-2.03022	1.21175e-06	expressed sequence AU018091 [Source:MGI Symbol;Acc:MGI:2142124]
ENSMUSG00000004317	Clcn5	23.2354	63.7711	-2.02999	0.00388002	chloride channel 5 [Source:MGI Symbol;Acc:MGI:99486]
ENSMUSG00000036002	Fam214b	40.8185	45.478	-2.02862	0.00192526	family with sequence similarity 214, member B [Source:MGI Symbol;Acc:MGI:2441854]
ENSMUSG00000021951	N6amt2	209.271	67.2922	2.02459	4.47022e-07	N-6 adenine-specific DNA methyltransferase 2 (putative) [Source:MGI Symbol;Acc:MGI:1915293]
ENSMUSG00000064326	Siva1	244.101	70.4306	2.02444	3.563e-07	SIVA1, apoptosis-inducing factor [Source:MGI Symbol;Acc:MGI:1353606]
ENSMUSG00000035764	Fbxo45	51.6195	83.8962	-2.02425	0.00178064	F-box protein 45 [Source:MGI Symbol;Acc:MGI:2447775]
ENSMUSG00000028527	Ak4	310.813	569.989	-2.01995	2.03207e-07	adenylate kinase 4 [Source:MGI Symbol;Acc:MGI:87979]
ENSMUSG00000028431	Ikbkap	54.452	91.6477	-2.01919	0.00159991	inhibitor of kappa light polypeptide enhancer in B cells, kinase complex-associated protein [Source:MGI Symbol;Acc:MGI:1914544]
ENSMUSG00000051344	Plekhm3	49.3485	117.796	-2.01751	0.000162196	pleckstrin homology domain containing, family M, member 3 [Source:MGI Symbol;Acc:MGI:2443627]
ENSMUSG00000036775	Decr2	73.5507	23.6745	2.01712	0.000332248	2-4-dienoyl-Coenzyme A reductase 2, peroxisomal [Source:MGI Symbol;Acc:MGI:1347059]
ENSMUSG00000039176	Polg	13.4282	23.335	-2.01571	0.0399037	polymerase (DNA directed), gamma [Source:MGI Symbol;Acc:MGI:1196389]
ENSMUSG00000036061	Smug1	12.7385	32.507	-2.01286	0.0355521	single-strand selective monofunctional uracil DNA glycosylase [Source:MGI Symbol;Acc:MGI:1918976]
ENSMUSG00000020956	Dtd2	28.1932	6.49477	2.0121	0.0353105	D-tyrosyl-tRNA deacylase 2 [Source:MGI Symbol;Acc:MGI:1923485]
ENSMUSG00000026219	Trip12	186.588	472.642	-2.01195	6.5915e-07	thyroid hormone receptor interactor 12 [Source:MGI Symbol;Acc:MGI:1309481]
ENSMUSG00000099759		28.6735	7.57233	2.01193	0.0487442
ENSMUSG00000041870	Ankrd13a	74.3523	131.976	-2.00981	5.00142e-05	ankyrin repeat domain 13a [Source:MGI Symbol;Acc:MGI:1915670]
ENSMUSG00000021553	Slc28a3	16.9067	42.8389	-2.00848	0.0396674	solute carrier family 28 (sodium-coupled nucleoside transporter), member 3 [Source:MGI Symbol;Acc:MGI:2137361]
ENSMUSG00000010290	AI597479	21.8257	51.0298	-2.00693	0.0105042	expressed sequence AI597479 [Source:MGI Symbol;Acc:MGI:2138299]
ENSMUSG00000036606	Plxnb2	48.5034	75.3994	-2.00509	0.000536386	plexin B2 [Source:MGI Symbol;Acc:MGI:2154239]
ENSMUSG00000038604	Fam65a	25.0999	50.588	-2.00355	0.00956977	family with sequence similarity 65, member A [Source:MGI Symbol;Acc:MGI:1922937]
ENSMUSG00000015002	Efr3a	12.5325	44.3087	-2.00309	0.0178671	EFR3 homolog A (S. cerevisiae) [Source:MGI Symbol;Acc:MGI:1923990]
ENSMUSG00000059970	Hspa2	11.1079	26.514	-2.00217	0.0454888	heat shock protein 2 [Source:MGI Symbol;Acc:MGI:96243]
ENSMUSG00000042106	Fam212a	26.8487	8.32045	1.99994	0.0299081	family with sequence similarity 212, member A [Source:MGI Symbol;Acc:MGI:1915426]
ENSMUSG00000002307	Daxx	20.6591	33.4071	-1.99873	0.0142398	Fas death domain-associated protein [Source:MGI Symbol;Acc:MGI:1197015]
ENSMUSG00000027546	Atp9a	27.5379	86.1629	-1.99741	0.000840507	ATPase, class II, type 9A [Source:MGI Symbol;Acc:MGI:1330826]
ENSMUSG00000063895	Nupl1	26.7775	61.36	-1.99669	0.00185661	nucleoporin like 1 [Source:MGI Symbol;Acc:MGI:1919094]
ENSMUSG00000010453	Kansl3	48.4651	107.728	-1.99644	0.00014828	KAT8 regulatory NSL complex subunit 3 [Source:MGI Symbol;Acc:MGI:1918055]
ENSMUSG00000025224	Gbf1	13.1524	19.9583	-1.99609	0.0497903	golgi-specific brefeldin A-resistance factor 1 [Source:MGI Symbol;Acc:MGI:1861607]
ENSMUSG00000029646	Cdx2	39.4142	69.3417	-1.99527	0.00097066	caudal type homeobox 2 [Source:MGI Symbol;Acc:MGI:88361]
ENSMUSG00000039990	Edrf1	13.2698	29.5457	-1.99416	0.0321072	erythroid differentiation regulatory factor 1 [Source:MGI Symbol;Acc:MGI:1919831]
ENSMUSG00000037474	Dtl	100.907	200.706	-1.99211	3.55275e-05	denticleless homolog (Drosophila) [Source:MGI Symbol;Acc:MGI:1924093]
ENSMUSG00000038250	Usp38	49.702	129.62	-1.99202	0.000317974	ubiquitin specific peptidase 38 [Source:MGI Symbol;Acc:MGI:1922091]
ENSMUSG00000037326	Capn15	12.1348	26.8987	-1.99188	0.0386884	calpain 15 [Source:MGI Symbol;Acc:MGI:1355075]
ENSMUSG00000021400	Wrnip1	12.4479	27.6943	-1.9907	0.0419467	Werner helicase interacting protein 1 [Source:MGI Symbol;Acc:MGI:1926153]
ENSMUSG00000025583	Rptor	7.34624	32.1016	-1.99002	0.0303181	regulatory associated protein of MTOR, complex 1 [Source:MGI Symbol;Acc:MGI:1921620]
ENSMUSG00000025779	Ly96	34.1481	10.9621	1.98904	0.0229885	lymphocyte antigen 96 [Source:MGI Symbol;Acc:MGI:1341909]
ENSMUSG00000005682	Pan2	26.2284	36.7738	-1.98707	0.0123727	PAN2 polyA specific ribonuclease subunit homolog (S. cerevisiae) [Source:MGI Symbol;Acc:MGI:1918984]
ENSMUSG00000021606	Ndufs6	186.701	58.1349	1.98375	2.78828e-05	NADH dehydrogenase (ubiquinone) Fe-S protein 6 [Source:MGI Symbol;Acc:MGI:107932]
ENSMUSG00000006731	B4galnt1	22.7335	38.0392	-1.9836	0.0205699	beta-1,4-N-acetyl-galactosaminyl transferase 1 [Source:MGI Symbol;Acc:MGI:1342057]
ENSMUSG00000074811	Hps6	18.5598	34.6882	-1.97936	0.0146463	Hermansky-Pudlak syndrome 6 [Source:MGI Symbol;Acc:MGI:2181763]
ENSMUSG00000043909	Trp53bp1	21.7558	58.1294	-1.9785	0.00415985	transformation related protein 53 binding protein 1 [Source:MGI Symbol;Acc:MGI:1351320]
ENSMUSG00000024422	Dhx16	87.6645	116.974	-1.97811	0.000173666	DEAH (Asp-Glu-Ala-His) box polypeptide 16 [Source:MGI Symbol;Acc:MGI:1916442]
ENSMUSG00000028552	Eps15	55.529	95.7474	-1.97746	0.000299702	epidermal growth factor receptor pathway substrate 15 [Source:MGI Symbol;Acc:MGI:104583]
ENSMUSG00000036270	Edc4	59.9779	140.539	-1.97666	0.000876945	enhancer of mRNA decapping 4 [Source:MGI Symbol;Acc:MGI:2446249]
ENSMUSG00000040725	Hnrnpul1	13.6673	32.2214	-1.97641	0.0387927	heterogeneous nuclear ribonucleoprotein U-like 1 [Source:MGI Symbol;Acc:MGI:2443517]
ENSMUSG00000089774	Slc5a3	9.27854	37.9023	-1.97416	0.0187614	solute carrier family 5 (inositol transporters), member 3 [Source:MGI Symbol;Acc:MGI:1858226]
ENSMUSG00000067889	Sptbn2	57.3606	142.24	-1.97372	6.5207e-05	spectrin beta, non-erythrocytic 2 [Source:MGI Symbol;Acc:MGI:1313261]
ENSMUSG00000030279	C2cd5	14.3567	42.4729	-1.96724	0.0143536	C2 calcium-dependent domain containing 5 [Source:MGI Symbol;Acc:MGI:1921991]
ENSMUSG00000020700	Map3k3	29.4311	80.1231	-1.96445	0.00463966	mitogen-activated protein kinase kinase kinase 3 [Source:MGI Symbol;Acc:MGI:1346874]
ENSMUSG00000045210	Vcpip1	16.1197	53.8296	-1.96342	0.0137915	valosin containing protein (p97)/p47 complex interacting protein 1 [Source:MGI Symbol;Acc:MGI:1917925]
ENSMUSG00000032633	Flcn	8.84384	41.6449	-1.96206	0.0244444	folliculin [Source:MGI Symbol;Acc:MGI:2442184]
ENSMUSG00000040018	Cox15	17.8286	36.3531	-1.95927	0.0182174	cytochrome c oxidase assembly protein 15 [Source:MGI Symbol;Acc:MGI:1920112]
ENSMUSG00000031119	Gpc4	14.2999	30.3576	-1.95882	0.0449604	glypican 4 [Source:MGI Symbol;Acc:MGI:104902]
ENSMUSG00000024429	Gnl1	40.1014	104.001	-1.95749	0.000523642	guanine nucleotide binding protein-like 1 [Source:MGI Symbol;Acc:MGI:95764]
ENSMUSG00000081586	Gm11544	28.9265	10.5061	1.95679	0.0293521	predicted gene 11544 [Source:MGI Symbol;Acc:MGI:3650736]
ENSMUSG00000072672	Duxbl3	46.1842	11.517	1.95447	0.0241114	double homeobox B-like 3 [Source:MGI Symbol;Acc:MGI:3710520]
ENSMUSG00000022875	Kng1	35.1084	10.7294	1.95416	0.0314657	kininogen 1 [Source:MGI Symbol;Acc:MGI:1097705]
ENSMUSG00000037400	Atp11b	44.2572	104.954	-1.95388	0.000552019	ATPase, class VI, type 11B [Source:MGI Symbol;Acc:MGI:1923545]
ENSMUSG00000021895	Arhgef3	51.1914	84.5795	-1.95367	0.000552019	Rho guanine nucleotide exchange factor (GEF) 3 [Source:MGI Symbol;Acc:MGI:1918954]
ENSMUSG00000039450	Dcxr	43.985	12.798	1.95233	0.0427817	dicarbonyl L-xylulose reductase [Source:MGI Symbol;Acc:MGI:1915130]
ENSMUSG00000049764	Zfp280b	83.3771	171.917	-1.95227	6.61149e-05	zinc finger protein 280B [Source:MGI Symbol;Acc:MGI:1927865]
ENSMUSG00000042605	Atxn2	95.1927	209.34	-1.95144	2.17382e-05	ataxin 2 [Source:MGI Symbol;Acc:MGI:1277223]
ENSMUSG00000038518	Jarid2	351.54	938.752	-1.95033	2.19013e-06	jumonji, AT rich interactive domain 2 [Source:MGI Symbol;Acc:MGI:104813]
ENSMUSG00000027699	Ect2	110.895	217.591	-1.95014	1.04507e-05	ect2 oncogene [Source:MGI Symbol;Acc:MGI:95281]
ENSMUSG00000001424	Snd1	25.4323	49.9285	-1.9499	0.00496159	staphylococcal nuclease and tudor domain containing 1 [Source:MGI Symbol;Acc:MGI:1929266]
ENSMUSG00000027478	Dnmt3b	70.9543	193.912	-1.94773	5.35205e-05	DNA methyltransferase 3B [Source:MGI Symbol;Acc:MGI:1261819]
ENSMUSG00000047777	Phf13	50.9632	127.468	-1.94716	0.000207992	PHD finger protein 13 [Source:MGI Symbol;Acc:MGI:2446217]
ENSMUSG00000040423	Rc3h1	29.0041	55.1978	-1.94461	0.00387077	RING CCCH (C3H) domains 1 [Source:MGI Symbol;Acc:MGI:2685397]
ENSMUSG00000025793	Hgs	125.196	194.449	-1.94294	8.32735e-06	HGF-regulated tyrosine kinase substrate [Source:MGI Symbol;Acc:MGI:104681]
ENSMUSG00000022897	Dyrk1a	23.8519	54.8865	-1.94272	0.0067726	dual-specificity tyrosine-(Y)-phosphorylation regulated kinase 1a [Source:MGI Symbol;Acc:MGI:1330299]
ENSMUSG00000090673	Gm340	41.9709	94.9035	-1.94255	0.000343032	predicted gene 340 [Source:MGI Symbol;Acc:MGI:2685186]
ENSMUSG00000021901	Bap1	80.6294	141.232	-1.94227	7.45403e-05	Brca1 associated protein 1 [Source:MGI Symbol;Acc:MGI:1206586]
ENSMUSG00000006932	Ctnnb1	51.7621	123.573	-1.93938	0.000659161	catenin (cadherin associated protein), beta 1 [Source:MGI Symbol;Acc:MGI:88276]
ENSMUSG00000041444	Arhgap32	18.1867	66.3219	-1.93835	0.00568878	Rho GTPase activating protein 32 [Source:MGI Symbol;Acc:MGI:2450166]
ENSMUSG00000038909	Kat7	91.9556	214.028	-1.93771	6.8141e-06	K(lysine) acetyltransferase 7 [Source:MGI Symbol;Acc:MGI:2182799]
ENSMUSG00000004947	Dtx2	12.2199	32.0234	-1.93756	0.0244444	deltex 2 homolog (Drosophila) [Source:MGI Symbol;Acc:MGI:1921448]
ENSMUSG00000027194	Ttc17	21.6329	35.1769	-1.93632	0.0227701	tetratricopeptide repeat domain 17 [Source:MGI Symbol;Acc:MGI:1921819]
ENSMUSG00000030662	Ipo5	390.518	928.553	-1.93549	1.58325e-05	importin 5 [Source:MGI Symbol;Acc:MGI:1917822]
ENSMUSG00000072082	Ccnf	96.7839	203.267	-1.93446	1.01729e-05	cyclin F [Source:MGI Symbol;Acc:MGI:102551]
ENSMUSG00000027184	Caprin1	258.296	585.353	-1.93378	2.63434e-05	cell cycle associated protein 1 [Source:MGI Symbol;Acc:MGI:1858234]
ENSMUSG00000046897	Zfp740	31.01	84.4759	-1.92827	0.00105073	zinc finger protein 740 [Source:MGI Symbol;Acc:MGI:1915994]
ENSMUSG00000006219	Fblim1	25.9098	55.3864	-1.92722	0.0119555	filamin binding LIM protein 1 [Source:MGI Symbol;Acc:MGI:1921452]
ENSMUSG00000056429	Tgoln1	49.7538	154.986	-1.92704	8.83721e-05	trans-golgi network protein [Source:MGI Symbol;Acc:MGI:105080]
ENSMUSG00000035632	Cnot3	19.1953	37.5237	-1.9261	0.0154638	CCR4-NOT transcription complex, subunit 3 [Source:MGI Symbol;Acc:MGI:2385261]
ENSMUSG00000054280	Prr14l	26.0007	40.6258	-1.92579	0.00932051	proline rich 14-like [Source:MGI Symbol;Acc:MGI:2443658]
ENSMUSG00000031974	Abcb10	31.6148	56.1165	-1.92328	0.00333875	ATP-binding cassette, sub-family B (MDR/TAP), member 10 [Source:MGI Symbol;Acc:MGI:1860508]
ENSMUSG00000021374	Nup153	52.2799	126.288	-1.9228	0.000132266	nucleoporin 153 [Source:MGI Symbol;Acc:MGI:2385621]
ENSMUSG00000034560	A230046K03Rik	46.5979	98.6246	-1.92242	0.000472584	RIKEN cDNA A230046K03 gene [Source:MGI Symbol;Acc:MGI:2441787]
ENSMUSG00000020238	Ncln	38.5058	72.7327	-1.91631	0.00128693	nicalin homolog (zebrafish) [Source:MGI Symbol;Acc:MGI:1926081]
ENSMUSG00000025812	Pard3	28.0954	53.3558	-1.91589	0.00448903	par-3 family cell polarity regulator [Source:MGI Symbol;Acc:MGI:2135608]
ENSMUSG00000078496	Gm13152	33.3871	74.1132	-1.91585	0.00198805	predicted gene 13152 [Source:MGI Symbol;Acc:MGI:3701121]
ENSMUSG00000032612	Usp4	51.0184	106.194	-1.91487	0.00222261	ubiquitin specific peptidase 4 (proto-oncogene) [Source:MGI Symbol;Acc:MGI:98905]
ENSMUSG00000003166	Dgcr2	14.2025	56.406	-1.91435	0.0105151	DiGeorge syndrome critical region gene 2 [Source:MGI Symbol;Acc:MGI:892866]
ENSMUSG00000031731	Ap1g1	98.9217	167.839	-1.91413	0.000196178	adaptor protein complex AP-1, gamma 1 subunit [Source:MGI Symbol;Acc:MGI:101919]
ENSMUSG00000001924	Uba1	309.001	611.248	-1.91281	2.37282e-06	ubiquitin-like modifier activating enzyme 1 [Source:MGI Symbol;Acc:MGI:98890]
ENSMUSG00000005871	Apc	19.494	63.7825	-1.91018	0.00580671	adenomatosis polyposis coli [Source:MGI Symbol;Acc:MGI:88039]
ENSMUSG00000040029	Ipo8	38.8451	52.0151	-1.90797	0.0053034	importin 8 [Source:MGI Symbol;Acc:MGI:2444611]
ENSMUSG00000044465	Fam160a2	23.1906	28.7541	-1.90792	0.0210983	family with sequence similarity 160, member A2 [Source:MGI Symbol;Acc:MGI:1921599]
ENSMUSG00000014349	Ube2z	31.5524	73.1137	-1.90558	0.0022916	ubiquitin-conjugating enzyme E2Z (putative) [Source:MGI Symbol;Acc:MGI:1343160]
ENSMUSG00000070834	Gm13015	36.078	12.608	1.90387	0.0139114	predicted gene 13015 [Source:MGI Symbol;Acc:MGI:3651767]
ENSMUSG00000001138	Cnnm3	15.8759	25.4775	-1.90204	0.042611	cyclin M3 [Source:MGI Symbol;Acc:MGI:2151055]
ENSMUSG00000064254	Ethe1	99.368	31.6951	1.90196	0.000492081	ethylmalonic encephalopathy 1 [Source:MGI Symbol;Acc:MGI:1913321]
ENSMUSG00000050335	Lgals3	37.4525	12.7912	1.90063	0.0133695	lectin, galactose binding, soluble 3 [Source:MGI Symbol;Acc:MGI:96778]
ENSMUSG00000029561	Oasl2	44.5182	61.9565	-1.89866	0.0143536	2'-5' oligoadenylate synthetase-like 2 [Source:MGI Symbol;Acc:MGI:1344390]
ENSMUSG00000036617	Etl4	19.5853	57.522	-1.89506	0.0123511	enhancer trap locus 4 [Source:MGI Symbol;Acc:MGI:95454]
ENSMUSG00000048154	Kmt2d	10.2027	41.6026	-1.89386	0.0252296	lysine (K)-specific methyltransferase 2D [Source:MGI Symbol;Acc:MGI:2682319]
ENSMUSG00000026667	Uhmk1	29.6281	89.0679	-1.89354	0.000894399	U2AF homology motif (UHM) kinase 1 [Source:MGI Symbol;Acc:MGI:1341908]
ENSMUSG00000018974	Sart3	35.9903	123.194	-1.89281	0.000439759	squamous cell carcinoma antigen recognized by T cells 3 [Source:MGI Symbol;Acc:MGI:1858230]
ENSMUSG00000026172	Bcs1l	30.1295	8.78817	1.89265	0.042865	BCS1-like (yeast) [Source:MGI Symbol;Acc:MGI:1914071]
ENSMUSG00000039285	Azi2	11.3389	29.4415	-1.89218	0.0374802	5-azacytidine induced gene 2 [Source:MGI Symbol;Acc:MGI:1351332]
ENSMUSG00000036676	Tmtc3	21.062	27.8735	-1.8917	0.026301	transmembrane and tetratricopeptide repeat containing 3 [Source:MGI Symbol;Acc:MGI:3036255]
ENSMUSG00000066877	Nck2	56.0327	137.357	-1.89108	0.000195824	non-catalytic region of tyrosine kinase adaptor protein 2 [Source:MGI Symbol;Acc:MGI:1306821]
ENSMUSG00000025575	Cant1	17.0537	32.5696	-1.8905	0.0268285	calcium activated nucleotidase 1 [Source:MGI Symbol;Acc:MGI:1923275]
ENSMUSG00000024613	Tcof1	65.4573	131.217	-1.88986	0.000140712	Treacher Collins Franceschetti syndrome 1, homolog [Source:MGI Symbol;Acc:MGI:892003]
ENSMUSG00000001729	Akt1	64.7162	117.912	-1.88818	0.000305371	thymoma viral proto-oncogene 1 [Source:MGI Symbol;Acc:MGI:87986]
ENSMUSG00000029439	Sfswap	14.9644	40.4471	-1.88716	0.0172288	splicing factor, suppressor of white-apricot homolog (Drosophila) [Source:MGI Symbol;Acc:MGI:101760]
ENSMUSG00000074305	Peak1	13.1256	44.4997	-1.88571	0.0167469	pseudopodium-enriched atypical kinase 1 [Source:MGI Symbol;Acc:MGI:2442366]
ENSMUSG00000024335	Brd2	138.996	347.337	-1.88527	4.33707e-06	bromodomain containing 2 [Source:MGI Symbol;Acc:MGI:99495]
ENSMUSG00000037364	Srrt	50.8553	115.137	-1.88397	0.000460522	serrate RNA effector molecule homolog (Arabidopsis) [Source:MGI Symbol;Acc:MGI:1933527]
ENSMUSG00000021311	Mtr	21.6822	40.2517	-1.8815	0.0457886	5-methyltetrahydrofolate-homocysteine methyltransferase [Source:MGI Symbol;Acc:MGI:894292]
ENSMUSG00000033382	Trappc8	55.7491	79.687	-1.88143	0.00986877	trafficking protein particle complex 8 [Source:MGI Symbol;Acc:MGI:2443008]
ENSMUSG00000002835	Chaf1a	29.2022	81.9071	-1.88073	0.000944416	chromatin assembly factor 1, subunit A (p150) [Source:MGI Symbol;Acc:MGI:1351331]
ENSMUSG00000029020	Mfn2	23.9009	45.3781	-1.87837	0.00894284	mitofusin 2 [Source:MGI Symbol;Acc:MGI:2442230]
ENSMUSG00000022556	Hsf1	26.328	63.6688	-1.87456	0.00312552	heat shock factor 1 [Source:MGI Symbol;Acc:MGI:96238]
ENSMUSG00000019214	Chtf18	36.2647	86.4275	-1.87257	0.00343249	CTF18, chromosome transmission fidelity factor 18 [Source:MGI Symbol;Acc:MGI:2384887]
ENSMUSG00000036501	Fam13b	13.7922	39.7515	-1.87213	0.0184854	family with sequence similarity 13, member B [Source:MGI Symbol;Acc:MGI:2447834]
ENSMUSG00000024036	Slc37a1	21.4294	37.8184	-1.87177	0.0175695	solute carrier family 37 (glycerol-3-phosphate transporter), member 1 [Source:MGI Symbol;Acc:MGI:2446181]
ENSMUSG00000036817	Sun1	391.7	755.235	-1.87152	5.27456e-06	Sad1 and UNC84 domain containing 1 [Source:MGI Symbol;Acc:MGI:1924303]
ENSMUSG00000036632	Alg5	35.6923	11.3483	1.87091	0.024027	asparagine-linked glycosylation 5 (dolichyl-phosphate beta-glucosyltransferase) [Source:MGI Symbol;Acc:MGI:1913498]
ENSMUSG00000024597	Slc12a2	253.147	741.827	-1.87089	1.87036e-05	solute carrier family 12, member 2 [Source:MGI Symbol;Acc:MGI:101924]
ENSMUSG00000041168	Lonp1	117.24	250.43	-1.86864	1.19577e-05	lon peptidase 1, mitochondrial [Source:MGI Symbol;Acc:MGI:1921392]
ENSMUSG00000033596	Rfwd3	56.5551	129.443	-1.86659	0.000605132	ring finger and WD repeat domain 3 [Source:MGI Symbol;Acc:MGI:2384584]
ENSMUSG00000020888	Dvl2	14.2137	33.1139	-1.86457	0.0276926	dishevelled 2, dsh homolog (Drosophila) [Source:MGI Symbol;Acc:MGI:106613]
ENSMUSG00000042138	Msantd2	16.9998	39.725	-1.86432	0.0195112	Myb/SANT-like DNA-binding domain containing 2 [Source:MGI Symbol;Acc:MGI:2384579]
ENSMUSG00000025261	Huwe1	147.724	405.076	-1.86424	4.61704e-06	HECT, UBA and WWE domain containing 1 [Source:MGI Symbol;Acc:MGI:1926884]
ENSMUSG00000050390	C77080	21.2003	43.3376	-1.86259	0.0120112	expressed sequence C77080 [Source:MGI Symbol;Acc:MGI:2140651]
ENSMUSG00000024949	Sf1	88.4963	225.669	-1.86233	1.52027e-05	splicing factor 1 [Source:MGI Symbol;Acc:MGI:1095403]
ENSMUSG00000047731	Wbp1l	28.9253	52.52	-1.86185	0.00765204	WW domain binding protein 1 like [Source:MGI Symbol;Acc:MGI:107577]
ENSMUSG00000004530	Coro1c	144.43	259.847	-1.86137	4.22365e-05	coronin, actin binding protein 1C [Source:MGI Symbol;Acc:MGI:1345964]
ENSMUSG00000038644	Pold1	54.99	129.706	-1.86124	0.000536386	polymerase (DNA directed), delta 1, catalytic subunit [Source:MGI Symbol;Acc:MGI:97741]
ENSMUSG00000036698	Ago2	144.904	396.417	-1.86037	1.22743e-05	argonaute RISC catalytic subunit 2 [Source:MGI Symbol;Acc:MGI:2446632]
ENSMUSG00000046591	Ticrr	53.2716	129.963	-1.85958	0.000482234	TOPBP1-interacting checkpoint and replication regulator [Source:MGI Symbol;Acc:MGI:1924261]
ENSMUSG00000033060	Lmo7	48.5178	87.1696	-1.85865	0.000536386	LIM domain only 7 [Source:MGI Symbol;Acc:MGI:1353586]
ENSMUSG00000050144	Slc25a44	81.828	252.899	-1.85813	2.15009e-05	solute carrier family 25, member 44 [Source:MGI Symbol;Acc:MGI:2444391]
ENSMUSG00000009073	Nf2	133.68	321.438	-1.85765	1.10565e-05	neurofibromatosis 2 [Source:MGI Symbol;Acc:MGI:97307]
ENSMUSG00000044167	Foxo1	18.8977	57.0853	-1.85677	0.00647448	forkhead box O1 [Source:MGI Symbol;Acc:MGI:1890077]
ENSMUSG00000024590	Lmnb1	71.2341	189.043	-1.85648	0.000603145	lamin B1 [Source:MGI Symbol;Acc:MGI:96795]
ENSMUSG00000032217	Rnf111	33.6727	97.9169	-1.85416	0.000536386	ring finger 111 [Source:MGI Symbol;Acc:MGI:1934919]
ENSMUSG00000004040	Stat3	38.2975	44.535	-1.85334	0.0104391	signal transducer and activator of transcription 3 [Source:MGI Symbol;Acc:MGI:103038]
ENSMUSG00000037300	Ttc13	38.9156	72.1607	-1.85122	0.00788317	tetratricopeptide repeat domain 13 [Source:MGI Symbol;Acc:MGI:2384573]
ENSMUSG00000067150	Xpo5	65.2708	91.112	-1.85039	0.000502791	exportin 5 [Source:MGI Symbol;Acc:MGI:1913789]
ENSMUSG00000034453	Polr3b	27.6383	61.7126	-1.8498	0.00373995	polymerase (RNA) III (DNA directed) polypeptide B [Source:MGI Symbol;Acc:MGI:1917678]
ENSMUSG00000070990	Foxe1	58.2231	83.1512	-1.84978	0.000524412	forkhead box E1 [Source:MGI Symbol;Acc:MGI:1353500]
ENSMUSG00000025572	Tmc6	16.4802	32.9519	-1.84924	0.0252936	transmembrane channel-like gene family 6 [Source:MGI Symbol;Acc:MGI:1098686]
ENSMUSG00000022095	Fam160b2	36.7654	64.5522	-1.84914	0.00279727	family with sequence similarity 160, member B2 [Source:MGI Symbol;Acc:MGI:3036290]
ENSMUSG00000020329	Polrmt	46.7898	123.976	-1.84742	0.00151198	polymerase (RNA) mitochondrial (DNA directed) [Source:MGI Symbol;Acc:MGI:1915843]
ENSMUSG00000024660	Incenp	92.2628	264.384	-1.84668	6.40982e-05	inner centromere protein [Source:MGI Symbol;Acc:MGI:1313288]
ENSMUSG00000035595	1600002K03Rik	29.0684	10.2398	1.84666	0.040367	RIKEN cDNA 1600002K03 gene [Source:MGI Symbol;Acc:MGI:1917020]
ENSMUSG00000074030	Exoc8	14.2384	35.4823	-1.84469	0.035558	exocyst complex component 8 [Source:MGI Symbol;Acc:MGI:2142527]
ENSMUSG00000042650	Alkbh5	18.2578	48.8516	-1.84413	0.0102315	alkB, alkylation repair homolog 5 (E. coli) [Source:MGI Symbol;Acc:MGI:2144489]
ENSMUSG00000045482	Trrap	12.6223	35.8866	-1.84389	0.0475248	transformation/transcription domain-associated protein [Source:MGI Symbol;Acc:MGI:2153272]
ENSMUSG00000033943	Mga	32.1471	118.762	-1.84094	0.000944416	MAX gene associated [Source:MGI Symbol;Acc:MGI:1352483]
ENSMUSG00000022150	Dab2	118.416	305.277	-1.84028	0.000155264	disabled 2, mitogen-responsive phosphoprotein [Source:MGI Symbol;Acc:MGI:109175]
ENSMUSG00000045252	Zfp574	39.349	77.7959	-1.83742	0.00890929	zinc finger protein 574 [Source:MGI Symbol;Acc:MGI:2442951]
ENSMUSG00000029071	Dvl1	24.8403	33.0122	-1.8374	0.0316527	dishevelled, dsh homolog 1 (Drosophila) [Source:MGI Symbol;Acc:MGI:94941]
ENSMUSG00000032485	Scap	44.9079	96.5371	-1.83656	0.00228744	SREBF chaperone [Source:MGI Symbol;Acc:MGI:2135958]
ENSMUSG00000066232	Ipo7	163.594	385.476	-1.83585	6.42926e-06	importin 7 [Source:MGI Symbol;Acc:MGI:2152414]
ENSMUSG00000038861	Pi4kb	11.0931	35.7299	-1.83512	0.039529	phosphatidylinositol 4-kinase, catalytic, beta polypeptide [Source:MGI Symbol;Acc:MGI:1334433]
ENSMUSG00000045319	Proser2	19.7199	53.4049	-1.83467	0.00860299	proline and serine rich 2 [Source:MGI Symbol;Acc:MGI:2442238]
ENSMUSG00000002550	Uck1	23.003	44.2967	-1.83419	0.0120112	uridine-cytidine kinase 1 [Source:MGI Symbol;Acc:MGI:98904]
ENSMUSG00000078515	Ddi2	75.402	191.147	-1.8332	0.000241261	DNA-damage inducible protein 2 [Source:MGI Symbol;Acc:MGI:1917244]
ENSMUSG00000053877	Srcap	39.475	145.24	-1.83171	0.000363243	Snf2-related CREBBP activator protein [Source:MGI Symbol;Acc:MGI:2444036]
ENSMUSG00000031016	Wee1	24.5243	44.4832	-1.83099	0.0183685	WEE 1 homolog 1 (S. pombe) [Source:MGI Symbol;Acc:MGI:103075]
ENSMUSG00000028700	Pomgnt1	15.0819	39.3441	-1.83082	0.0337724	protein O-linked mannose beta 1,2-N-acetylglucosaminyltransferase [Source:MGI Symbol;Acc:MGI:1915523]
ENSMUSG00000031835	Mbtps1	41.9071	88.7054	-1.83073	0.00198733	membrane-bound transcription factor peptidase, site 1 [Source:MGI Symbol;Acc:MGI:1927235]
ENSMUSG00000031148	Gpkow	65.2334	160.869	-1.83032	0.000309998	G patch domain and KOW motifs [Source:MGI Symbol;Acc:MGI:1859610]
ENSMUSG00000002812	Flii	46.4781	133.199	-1.82763	0.000399346	flightless I homolog (Drosophila) [Source:MGI Symbol;Acc:MGI:1342286]
ENSMUSG00000091780	Sco2	31.4121	11.8775	1.82718	0.0335788	SCO cytochrome oxidase deficient homolog 2 (yeast) [Source:MGI Symbol;Acc:MGI:3818630]
ENSMUSG00000010660	Plcd1	60.5093	90.4703	-1.82549	0.00730464	phospholipase C, delta 1 [Source:MGI Symbol;Acc:MGI:97614]
ENSMUSG00000041245	Wnk3	19.9053	69.1308	-1.82532	0.0231569	WNK lysine deficient protein kinase 3 [Source:MGI Symbol;Acc:MGI:2652875]
ENSMUSG00000023830	Igf2r	96.6133	271.59	-1.82345	7.82627e-05	insulin-like growth factor 2 receptor [Source:MGI Symbol;Acc:MGI:96435]
ENSMUSG00000056476	Med12l	15.9468	53.4832	-1.82118	0.0181811	mediator complex subunit 12-like [Source:MGI Symbol;Acc:MGI:2139916]
ENSMUSG00000054942	Fam73a	20.83	35.6885	-1.82029	0.022856	family with sequence similarity 73, member A [Source:MGI Symbol;Acc:MGI:1924567]
ENSMUSG00000094724	Rnaset2b	291.206	108.745	1.81793	9.92778e-06	ribonuclease T2B [Source:MGI Symbol;Acc:MGI:3702087]
ENSMUSG00000010358	Ifi35	53.9261	20.1254	1.81766	0.00440394	interferon-induced protein 35 [Source:MGI Symbol;Acc:MGI:1917360]
ENSMUSG00000025437	Usp33	188.927	447.75	-1.81678	1.13105e-05	ubiquitin specific peptidase 33 [Source:MGI Symbol;Acc:MGI:2159711]
ENSMUSG00000049516	Spty2d1	71.3624	129.757	-1.81565	0.000214488	SPT2, Suppressor of Ty, domain containing 1 (S. cerevisiae) [Source:MGI Symbol;Acc:MGI:2142062]
ENSMUSG00000034158	Lrrc58	40.9695	113.595	-1.81405	0.003115	leucine rich repeat containing 58 [Source:MGI Symbol;Acc:MGI:2443542]
ENSMUSG00000021245	Mlh3	13.0821	34.1011	-1.8137	0.0462275	mutL homolog 3 (E coli) [Source:MGI Symbol;Acc:MGI:1353455]
ENSMUSG00000029547	Ints1	18.0255	52.739	-1.81233	0.018043	integrator complex subunit 1 [Source:MGI Symbol;Acc:MGI:1915760]
ENSMUSG00000073758	Sh3d21	36.3715	98.6402	-1.81185	0.00103577	SH3 domain containing 21 [Source:MGI Symbol;Acc:MGI:1914188]
ENSMUSG00000006456	Rbm14	51.4405	138.435	-1.81172	0.000382491	RNA binding motif protein 14 [Source:MGI Symbol;Acc:MGI:1929092]
ENSMUSG00000029028	Lrrc47	55.3346	146.717	-1.81062	0.000337369	leucine rich repeat containing 47 [Source:MGI Symbol;Acc:MGI:1920196]
ENSMUSG00000004267	Eno2	24.546	45.8434	-1.81037	0.0139102	enolase 2, gamma neuronal [Source:MGI Symbol;Acc:MGI:95394]
ENSMUSG00000061167	Rpl15-ps3	433.674	160.811	1.80806	1.13105e-05	ribosomal protein L15, pseudogene 3 [Source:MGI Symbol;Acc:MGI:3782952]
ENSMUSG00000022905	Kpna1	105.35	260.695	-1.80793	1.41017e-05	karyopherin (importin) alpha 1 [Source:MGI Symbol;Acc:MGI:103560]
ENSMUSG00000024283	Wac	166.509	419.164	-1.8077	6.8141e-06	WW domain containing adaptor with coiled-coil [Source:MGI Symbol;Acc:MGI:2387357]
ENSMUSG00000040940	Arhgef1	53.9202	77.1394	-1.80749	0.00179254	Rho guanine nucleotide exchange factor (GEF) 1 [Source:MGI Symbol;Acc:MGI:1353510]
ENSMUSG00000032042	Srpr	184.566	332.103	-1.80675	7.49787e-06	signal recognition particle receptor ('docking protein') [Source:MGI Symbol;Acc:MGI:1914648]
ENSMUSG00000044791	Setd2	151.46	385.582	-1.80263	1.61153e-05	SET domain containing 2 [Source:MGI Symbol;Acc:MGI:1918177]
ENSMUSG00000034931	Dhx8	46.5659	112.11	-1.80212	0.00132374	DEAH (Asp-Glu-Ala-His) box polypeptide 8 [Source:MGI Symbol;Acc:MGI:1306823]
ENSMUSG00000032480	Dhx30	88.628	175.974	-1.8016	8.20756e-05	DEAH (Asp-Glu-Ala-His) box polypeptide 30 [Source:MGI Symbol;Acc:MGI:1920081]
ENSMUSG00000073155	1810058I24Rik	38.9496	12.4211	1.80122	0.0216468	RIKEN cDNA 1810058I24 gene [Source:MGI Symbol;Acc:MGI:1914955]
ENSMUSG00000033581	Igf2bp2	107.3	237.389	-1.80048	0.000162774	insulin-like growth factor 2 mRNA binding protein 2 [Source:MGI Symbol;Acc:MGI:1890358]
ENSMUSG00000027305	Ndufaf1	86.6574	33.0247	1.80044	0.000360379	NADH dehydrogenase (ubiquinone) 1 alpha subcomplex, assembly factor 1 [Source:MGI Symbol;Acc:MGI:1916952]
ENSMUSG00000025047	Pdcd11	24.8505	80.4177	-1.80027	0.00500768	programmed cell death 11 [Source:MGI Symbol;Acc:MGI:1341788]
ENSMUSG00000019984	Med23	21.9106	32.5491	-1.79753	0.0284464	mediator complex subunit 23 [Source:MGI Symbol;Acc:MGI:1917458]
ENSMUSG00000009630	Ppp2cb	23.6777	42.7578	-1.79503	0.0133695	protein phosphatase 2 (formerly 2A), catalytic subunit, beta isoform [Source:MGI Symbol;Acc:MGI:1321161]
ENSMUSG00000031078	Cttn	112.029	291.284	-1.79467	0.000141606	cortactin [Source:MGI Symbol;Acc:MGI:99695]
ENSMUSG00000034075	Zdhhc5	78.9412	150.44	-1.79415	0.000214488	zinc finger, DHHC domain containing 5 [Source:MGI Symbol;Acc:MGI:1923573]
ENSMUSG00000003752	Itpkc	35.0094	48.5799	-1.79338	0.00594031	inositol 1,4,5-trisphosphate 3-kinase C [Source:MGI Symbol;Acc:MGI:2442554]
ENSMUSG00000021215	Net1	80.607	147.109	-1.79107	0.000803175	neuroepithelial cell transforming gene 1 [Source:MGI Symbol;Acc:MGI:1927138]
ENSMUSG00000032679	Cd59a	57.763	21.0566	1.78922	0.00597663	CD59a antigen [Source:MGI Symbol;Acc:MGI:109177]
ENSMUSG00000053754	Chd8	13.1782	31.429	-1.78921	0.0462898	chromodomain helicase DNA binding protein 8 [Source:MGI Symbol;Acc:MGI:1915022]
ENSMUSG00000055024	Ep300	42.785	144.881	-1.78743	0.000537138	E1A binding protein p300 [Source:MGI Symbol;Acc:MGI:1276116]
ENSMUSG00000061458	Nol10	24.2859	62.7627	-1.78739	0.00568754	nucleolar protein 10 [Source:MGI Symbol;Acc:MGI:2684913]
ENSMUSG00000004207	Psap	650.895	1305.48	-1.78638	0.000106459	prosaposin [Source:MGI Symbol;Acc:MGI:97783]
ENSMUSG00000059436	Max	14.6868	41.2388	-1.78607	0.0413859	Max protein [Source:MGI Symbol;Acc:MGI:96921]
ENSMUSG00000045374	Wdr81	22.3929	78.0279	-1.78525	0.0195115	WD repeat domain 81 [Source:MGI Symbol;Acc:MGI:2681828]
ENSMUSG00000068876	Cgn	37.1913	125.432	-1.78474	0.00229459	cingulin [Source:MGI Symbol;Acc:MGI:1927237]
ENSMUSG00000032727	Mier3	367.295	857.143	-1.78247	1.39092e-05	mesoderm induction early response 1, family member 3 [Source:MGI Symbol;Acc:MGI:2442317]
ENSMUSG00000017210	Med24	101.365	223.565	-1.78211	7.03384e-05	mediator complex subunit 24 [Source:MGI Symbol;Acc:MGI:1344385]
ENSMUSG00000021608	Lpcat1	19.0566	39.8553	-1.78023	0.043469	lysophosphatidylcholine acyltransferase 1 [Source:MGI Symbol;Acc:MGI:2384812]
ENSMUSG00000055900	Tmem69	72.3447	23.2266	1.77966	0.00362485	transmembrane protein 69 [Source:MGI Symbol;Acc:MGI:3045357]
ENSMUSG00000029190	D5Ertd579e	8.88089	34.7457	-1.77941	0.0426384	DNA segment, Chr 5, ERATO Doi 579, expressed [Source:MGI Symbol;Acc:MGI:1261849]
ENSMUSG00000036636	Clcn7	30.4731	46.95	-1.77834	0.010738	chloride channel 7 [Source:MGI Symbol;Acc:MGI:1347048]
ENSMUSG00000041815	Poldip3	101.216	230.642	-1.77745	0.000124446	polymerase (DNA-directed), delta interacting protein 3 [Source:MGI Symbol;Acc:MGI:1921076]
ENSMUSG00000022533	Atp13a3	243.893	583.132	-1.77699	1.20415e-05	ATPase type 13A3 [Source:MGI Symbol;Acc:MGI:2685387]
ENSMUSG00000003644	Rps6ka1	100.723	200.61	-1.77545	0.000155052	ribosomal protein S6 kinase polypeptide 1 [Source:MGI Symbol;Acc:MGI:104558]
ENSMUSG00000093678	Gm20608	14.0939	29.1323	-1.77511	0.0438944	predicted gene 20608 [Source:MGI Symbol;Acc:MGI:5313055]
ENSMUSG00000032437	Stt3b	51.3807	123.259	-1.77412	0.0020562	STT3, subunit of the oligosaccharyltransferase complex, homolog B (S. cerevisiae) [Source:MGI Symbol;Acc:MGI:1915542]
ENSMUSG00000018707	Dync1h1	13.594	55.8844	-1.77314	0.0106863	dynein cytoplasmic 1 heavy chain 1 [Source:MGI Symbol;Acc:MGI:103147]
ENSMUSG00000061950	Ppp4r1	34.519	56.5529	-1.77306	0.00703196	protein phosphatase 4, regulatory subunit 1 [Source:MGI Symbol;Acc:MGI:1917601]
ENSMUSG00000035248	Zcchc6	21.2112	45.9027	-1.7729	0.0133147	zinc finger, CCHC domain containing 6 [Source:MGI Symbol;Acc:MGI:2387179]
ENSMUSG00000049680	Urgcp	32.0214	101.185	-1.77282	0.000944416	upregulator of cell proliferation [Source:MGI Symbol;Acc:MGI:1919296]
ENSMUSG00000101111		2512.82	963.008	1.77038	3.09462e-05
ENSMUSG00000051220	Ercc6l	14.5528	37.1808	-1.76936	0.0315029	excision repair cross-complementing rodent repair deficiency complementation group 6 like [Source:MGI Symbol;Acc:MGI:2654144]
ENSMUSG00000084128	Esrp2	110.341	209.904	-1.76896	0.000124446	epithelial splicing regulatory protein 2 [Source:MGI Symbol;Acc:MGI:1924661]
ENSMUSG00000002129	Sf3a1	72.4838	166.936	-1.76874	0.000374023	splicing factor 3a, subunit 1 [Source:MGI Symbol;Acc:MGI:1914715]
ENSMUSG00000039804	Ncoa5	29.2116	37.3692	-1.76863	0.0173336	nuclear receptor coactivator 5 [Source:MGI Symbol;Acc:MGI:2385165]
ENSMUSG00000075279	Mrpl23-ps1	48.1012	18.5165	1.76555	0.0108029	mitichondrial ribosomal protein L23, pseudogene 1 [Source:MGI Symbol;Acc:MGI:3650679]
ENSMUSG00000026380	Tfcp2l1	129.575	275.991	-1.76521	0.00016308	transcription factor CP2-like 1 [Source:MGI Symbol;Acc:MGI:2444691]
ENSMUSG00000031691	Tnpo2	43.1106	130.01	-1.76111	0.00126031	transportin 2 (importin 3, karyopherin beta 2b) [Source:MGI Symbol;Acc:MGI:2384849]
ENSMUSG00000027245	Hypk	220.546	83.6745	1.76031	1.24346e-05	huntingtin interacting protein K [Source:MGI Symbol;Acc:MGI:1914943]
ENSMUSG00000046062	Ppp1r15b	47.9858	80.0911	-1.75994	0.00288634	protein phosphatase 1, regulatory (inhibitor) subunit 15b [Source:MGI Symbol;Acc:MGI:2444211]
ENSMUSG00000029416	Slc15a4	15.0738	37.4067	-1.75959	0.042611	solute carrier family 15, member 4 [Source:MGI Symbol;Acc:MGI:2140796]
ENSMUSG00000026553	Copa	54.2449	87.6579	-1.75944	0.00314507	coatomer protein complex subunit alpha [Source:MGI Symbol;Acc:MGI:1334462]
ENSMUSG00000005893	Nr2c2	51.6308	127.006	-1.75786	0.00132374	nuclear receptor subfamily 2, group C, member 2 [Source:MGI Symbol;Acc:MGI:1352466]
ENSMUSG00000053841	Txlna	99.2046	223.33	-1.75691	0.000295694	taxilin alpha [Source:MGI Symbol;Acc:MGI:105968]
ENSMUSG00000071646	Mta2	159.527	307.205	-1.75579	0.000124446	metastasis-associated gene family, member 2 [Source:MGI Symbol;Acc:MGI:1346340]
ENSMUSG00000001280	Sp1	28.3581	55.6388	-1.75482	0.00804101	trans-acting transcription factor 1 [Source:MGI Symbol;Acc:MGI:98372]
ENSMUSG00000044308	Ubr3	30.9355	70.8453	-1.75068	0.0107034	ubiquitin protein ligase E3 component n-recognin 3 [Source:MGI Symbol;Acc:MGI:1861100]
ENSMUSG00000001482	Def8	186.464	456.587	-1.74969	3.41117e-05	differentially expressed in FDCP 8 [Source:MGI Symbol;Acc:MGI:1346331]
ENSMUSG00000068329	Htra2	19.2201	48.1909	-1.747	0.0154638	HtrA serine peptidase 2 [Source:MGI Symbol;Acc:MGI:1928676]
ENSMUSG00000093752	Gm20716	23.5413	76.5347	-1.74607	0.00582799	predicted gene 20716 [Source:MGI Symbol;Acc:MGI:5313163]
ENSMUSG00000024764	Naa40	31.7037	54.8628	-1.74237	0.00977524	N(alpha)-acetyltransferase 40, NatD catalytic subunit, homolog (S. cerevisiae) [Source:MGI Symbol;Acc:MGI:1918249]
ENSMUSG00000024642	Tle4	241.208	474.972	-1.74135	7.72642e-06	transducin-like enhancer of split 4, homolog of Drosophila E(spl) [Source:MGI Symbol;Acc:MGI:104633]
ENSMUSG00000040084	Bub1b	80.621	187.944	-1.74072	0.000351921	budding uninhibited by benzimidazoles 1 homolog, beta (S. cerevisiae) [Source:MGI Symbol;Acc:MGI:1333889]
ENSMUSG00000062373	Tmem65	46.6221	98.2763	-1.73903	0.00162909	transmembrane protein 65 [Source:MGI Symbol;Acc:MGI:1922118]
ENSMUSG00000035898	Uba6	20.0288	38.8355	-1.73844	0.024187	ubiquitin-like modifier activating enzyme 6 [Source:MGI Symbol;Acc:MGI:1913894]
ENSMUSG00000023243	Kcnk5	132.754	271.983	-1.73831	0.00190677	potassium channel, subfamily K, member 5 [Source:MGI Symbol;Acc:MGI:1336175]
ENSMUSG00000030706	Mrpl48	96.6221	35.2592	1.73793	0.00085789	mitochondrial ribosomal protein L48 [Source:MGI Symbol;Acc:MGI:1289321]
ENSMUSG00000030275	Etnk1	41.6612	94.1324	-1.73751	0.00214431	ethanolamine kinase 1 [Source:MGI Symbol;Acc:MGI:1922570]
ENSMUSG00000038990	Cables2	24.7284	41.4164	-1.73725	0.0187492	CDK5 and Abl enzyme substrate 2 [Source:MGI Symbol;Acc:MGI:2182335]
ENSMUSG00000003435	Supt5	240.624	514.431	-1.73703	6.38493e-06	suppressor of Ty 5 [Source:MGI Symbol;Acc:MGI:1202400]
ENSMUSG00000004880	Lbr	177.549	357.483	-1.73641	3.93741e-05	lamin B receptor [Source:MGI Symbol;Acc:MGI:2138281]
ENSMUSG00000036779	Papd5	169.12	419.002	-1.73613	5.63556e-05	PAP associated domain containing 5 [Source:MGI Symbol;Acc:MGI:1917820]
ENSMUSG00000025154	Arhgap19	29.0272	60.4694	-1.73355	0.0124684	Rho GTPase activating protein 19 [Source:MGI Symbol;Acc:MGI:1918335]
ENSMUSG00000062949	Atp11c	16.4598	55.2035	-1.73229	0.021289	ATPase, class VI, type 11C [Source:MGI Symbol;Acc:MGI:1859661]
ENSMUSG00000007817	Zmiz1	80.1329	208.73	-1.73185	0.000289009	zinc finger, MIZ-type containing 1 [Source:MGI Symbol;Acc:MGI:3040693]
ENSMUSG00000036860	Mrpl55	85.7244	33.904	1.73126	0.000802876	mitochondrial ribosomal protein L55 [Source:MGI Symbol;Acc:MGI:1914462]
ENSMUSG00000030536	Iqgap1	67.0326	122.784	-1.73024	0.00074508	IQ motif containing GTPase activating protein 1 [Source:MGI Symbol;Acc:MGI:1352757]
ENSMUSG00000036737	Oxsr1	20.1271	50.338	-1.72992	0.0141347	oxidative-stress responsive 1 [Source:MGI Symbol;Acc:MGI:1917378]
ENSMUSG00000048701	Ccdc6	12.1872	41.1978	-1.72839	0.0468844	coiled-coil domain containing 6 [Source:MGI Symbol;Acc:MGI:1923801]
ENSMUSG00000053334	Ficd	45.1134	68.2912	-1.72801	0.00408023	FIC domain containing [Source:MGI Symbol;Acc:MGI:1098550]
ENSMUSG00000028136	Snx27	23.43	49.1955	-1.72758	0.0272541	sorting nexin family member 27 [Source:MGI Symbol;Acc:MGI:1923992]
ENSMUSG00000052397	Ezr	29.5175	32.0104	-1.72751	0.0345817	ezrin [Source:MGI Symbol;Acc:MGI:98931]
ENSMUSG00000049164	Zfp518a	13.9893	38.8509	-1.72695	0.0369694	zinc finger protein 518A [Source:MGI Symbol;Acc:MGI:1919922]
ENSMUSG00000033530	Ttc7b	69.2002	107.608	-1.7267	0.00103577	tetratricopeptide repeat domain 7B [Source:MGI Symbol;Acc:MGI:2144724]
ENSMUSG00000021224	Numb	31.5188	50.9041	-1.72582	0.0121944	numb gene homolog (Drosophila) [Source:MGI Symbol;Acc:MGI:107423]
ENSMUSG00000037553	Zdhhc18	41.3721	76.527	-1.72522	0.00725385	zinc finger, DHHC domain containing 18 [Source:MGI Symbol;Acc:MGI:3527792]
ENSMUSG00000063412	Gm10131	268.862	103.142	1.72446	8.22704e-06	predicted pseudogene 10131 [Source:MGI Symbol;Acc:MGI:3704308]
ENSMUSG00000033909	Usp36	29.4291	57.9811	-1.724	0.00710437	ubiquitin specific peptidase 36 [Source:MGI Symbol;Acc:MGI:1919594]
ENSMUSG00000017478	Zc3h18	45.975	73.1529	-1.72287	0.00279272	zinc finger CCCH-type containing 18 [Source:MGI Symbol;Acc:MGI:1923264]
ENSMUSG00000032348	Gsta4	58.0685	21.498	1.72206	0.0185156	glutathione S-transferase, alpha 4 [Source:MGI Symbol;Acc:MGI:1309515]
ENSMUSG00000045598	Zfp553	23.4716	50.8636	-1.71922	0.0232163	zinc finger protein 553 [Source:MGI Symbol;Acc:MGI:2384725]
ENSMUSG00000004263	Atn1	16.3576	38.9418	-1.71753	0.0286693	atrophin 1 [Source:MGI Symbol;Acc:MGI:104725]
ENSMUSG00000022797	Tfrc	482.281	1061.44	-1.71734	9.1233e-05	transferrin receptor [Source:MGI Symbol;Acc:MGI:98822]
ENSMUSG00000002379	Ndufa11	173.052	66.1816	1.7164	0.000295694	NADH dehydrogenase (ubiquinone) 1 alpha subcomplex 11 [Source:MGI Symbol;Acc:MGI:1917125]
ENSMUSG00000037190	Cyb561d2	48.1707	20.0333	1.71503	0.01065	cytochrome b-561 domain containing 2 [Source:MGI Symbol;Acc:MGI:1929280]
ENSMUSG00000020464	Pnpt1	29.2681	41.9009	-1.71343	0.0209553	polyribonucleotide nucleotidyltransferase 1 [Source:MGI Symbol;Acc:MGI:1918951]
ENSMUSG00000039187	Fanci	22.3165	28.5985	-1.71218	0.042865	Fanconi anemia, complementation group I [Source:MGI Symbol;Acc:MGI:2384790]
ENSMUSG00000031714	Gab1	47.4944	82.7925	-1.71131	0.00398724	growth factor receptor bound protein 2-associated protein 1 [Source:MGI Symbol;Acc:MGI:108088]
ENSMUSG00000039887	Alg14	61.2839	21.6199	1.71054	0.00848445	asparagine-linked glycosylation 14 [Source:MGI Symbol;Acc:MGI:1914039]
ENSMUSG00000042590	Ipo11	115.791	241.775	-1.71053	0.000189746	importin 11 [Source:MGI Symbol;Acc:MGI:2442377]
ENSMUSG00000019820	Utrn	30.4276	62.8482	-1.71037	0.0124411	utrophin [Source:MGI Symbol;Acc:MGI:104631]
ENSMUSG00000027288	Zfp106	98.5645	228.648	-1.70847	0.000466277	zinc finger protein 106 [Source:MGI Symbol;Acc:MGI:1270153]
ENSMUSG00000028393	Alad	115.599	45.5243	1.70791	0.000472909	aminolevulinate, delta-, dehydratase [Source:MGI Symbol;Acc:MGI:96853]
ENSMUSG00000026790	Odf2	32.2311	27.9226	-1.70777	0.031996	outer dense fiber of sperm tails 2 [Source:MGI Symbol;Acc:MGI:1098824]
ENSMUSG00000036591	Arhgap21	36.3253	149.872	-1.70706	0.000574883	Rho GTPase activating protein 21 [Source:MGI Symbol;Acc:MGI:1918685]
ENSMUSG00000025220	Mgea5	86.197	164.242	-1.70523	0.000290238	meningioma expressed antigen 5 (hyaluronidase) [Source:MGI Symbol;Acc:MGI:1932139]
ENSMUSG00000091490	Triml2	125.732	44.0793	1.70493	0.000483182	tripartite motif family-like 2 [Source:MGI Symbol;Acc:MGI:3642989]
ENSMUSG00000030754	Copb1	26.8371	53.3455	-1.70464	0.0134299	coatomer protein complex, subunit beta 1 [Source:MGI Symbol;Acc:MGI:1917599]
ENSMUSG00000028766	Alpl	24.3448	59.4497	-1.70456	0.0263184	alkaline phosphatase, liver/bone/kidney [Source:MGI Symbol;Acc:MGI:87983]
ENSMUSG00000042772	Smg7	31.192	102.322	-1.70424	0.00152722	Smg-7 homolog, nonsense mediated mRNA decay factor (C. elegans) [Source:MGI Symbol;Acc:MGI:2682334]
ENSMUSG00000005198	Polr2a	15.7768	62.4683	-1.70344	0.0135786	polymerase (RNA) II (DNA directed) polypeptide A [Source:MGI Symbol;Acc:MGI:98086]
ENSMUSG00000019302	Atp6v0a1	41.64	57.9879	-1.70343	0.00672509	ATPase, H+ transporting, lysosomal V0 subunit A1 [Source:MGI Symbol;Acc:MGI:103286]
ENSMUSG00000018931	Gm16515	51.7846	113.438	-1.70273	0.00197356	predicted gene, Gm16515 [Source:MGI Symbol;Acc:MGI:1344388]
ENSMUSG00000001419	Mef2d	68.2598	128.559	-1.70228	0.0006565	myocyte enhancer factor 2D [Source:MGI Symbol;Acc:MGI:99533]
ENSMUSG00000056537	Rlim	51.7593	146.669	-1.70202	0.00185661	ring finger protein, LIM domain interacting [Source:MGI Symbol;Acc:MGI:1342291]
ENSMUSG00000021133	4933426M11Rik	32.7727	93.8022	-1.70062	0.00345606	RIKEN cDNA 4933426M11 gene [Source:MGI Symbol;Acc:MGI:2444661]
ENSMUSG00000039157	Fam102a	19.331	37.6613	-1.70049	0.0300682	family with sequence similarity 102, member A [Source:MGI Symbol;Acc:MGI:2138935]
ENSMUSG00000028699	Tspan1	168.516	66.1111	1.69995	0.000278805	tetraspanin 1 [Source:MGI Symbol;Acc:MGI:1914055]
ENSMUSG00000020890	Gucy2e	23.092	45.385	-1.69949	0.0389736	guanylate cyclase 2e [Source:MGI Symbol;Acc:MGI:105123]
ENSMUSG00000025034	Trim8	20.73	38.624	-1.69703	0.0294968	tripartite motif-containing 8 [Source:MGI Symbol;Acc:MGI:1933302]
ENSMUSG00000042520	Ubap2l	52.6148	153.384	-1.69678	0.000790672	ubiquitin-associated protein 2-like [Source:MGI Symbol;Acc:MGI:1921633]
ENSMUSG00000028452	Vcp	399.13	860.522	-1.69663	0.000244658	valosin containing protein [Source:MGI Symbol;Acc:MGI:99919]
ENSMUSG00000067942	Zfp160	27.7961	35.4303	-1.69609	0.0314311	zinc finger protein 160 [Source:MGI Symbol;Acc:MGI:108187]
ENSMUSG00000022822	Abcc5	22.425	57.2928	-1.69605	0.0110904	ATP-binding cassette, sub-family C (CFTR/MRP), member 5 [Source:MGI Symbol;Acc:MGI:1351644]
ENSMUSG00000042207	Kdm5b	148.755	376.68	-1.69487	2.37694e-05	lysine (K)-specific demethylase 5B [Source:MGI Symbol;Acc:MGI:1922855]
ENSMUSG00000026773	Pfkfb3	41.8053	76.5868	-1.69481	0.00507291	6-phosphofructo-2-kinase/fructose-2,6-biphosphatase 3 [Source:MGI Symbol;Acc:MGI:2181202]
ENSMUSG00000042608	Stk40	25.2781	47.2414	-1.69472	0.0148908	serine/threonine kinase 40 [Source:MGI Symbol;Acc:MGI:1921428]
ENSMUSG00000047030	Spata2	87.558	115.673	-1.69268	0.0025751	spermatogenesis associated 2 [Source:MGI Symbol;Acc:MGI:2146885]
ENSMUSG00000010045	Tmem115	22.1444	31.9199	-1.6923	0.0338366	transmembrane protein 115 [Source:MGI Symbol;Acc:MGI:1930765]
ENSMUSG00000009076	Zmat5	217.474	88.4719	1.6917	0.000119115	zinc finger, matrin type 5 [Source:MGI Symbol;Acc:MGI:1914428]
ENSMUSG00000039100	March6	18.7807	42.3897	-1.68978	0.032568	membrane-associated ring finger (C3HC4) 6 [Source:MGI Symbol;Acc:MGI:2442773]
ENSMUSG00000045078	Rnf216	95.0988	189.516	-1.68764	0.000246142	ring finger protein 216 [Source:MGI Symbol;Acc:MGI:1344349]
ENSMUSG00000071076	Jund	26.2074	35.4612	-1.68712	0.0249781	jun D proto-oncogene [Source:MGI Symbol;Acc:MGI:96648]
ENSMUSG00000073542	Cep76	45.3775	80.5292	-1.68629	0.00316597	centrosomal protein 76 [Source:MGI Symbol;Acc:MGI:1923401]
ENSMUSG00000022350	E430025E21Rik	33.5437	98.3657	-1.68573	0.00254819	RIKEN cDNA E430025E21 gene [Source:MGI Symbol;Acc:MGI:2146110]
ENSMUSG00000032705	Exd2	23.8364	49.5277	-1.68537	0.0214463	exonuclease 3'-5' domain containing 2 [Source:MGI Symbol;Acc:MGI:1922485]
ENSMUSG00000061411	Nol4l	61.4287	149.991	-1.68494	0.000715551	nucleolar protein 4-like [Source:MGI Symbol;Acc:MGI:1918765]
ENSMUSG00000075558	Gm17151	123.482	48.8741	1.68361	0.00407246	predicted gene 17151 [Source:MGI Symbol;Acc:MGI:4937978]
ENSMUSG00000064127	Med14	70.3784	129.705	-1.68271	0.00500768	mediator complex subunit 14 [Source:MGI Symbol;Acc:MGI:1349442]
ENSMUSG00000025068	Gsto1	542.979	188.082	1.6826	8.05534e-05	glutathione S-transferase omega 1 [Source:MGI Symbol;Acc:MGI:1342273]
ENSMUSG00000024941	Scyl1	35.2	69.7213	-1.68115	0.0291144	SCY1-like 1 (S. cerevisiae) [Source:MGI Symbol;Acc:MGI:1931787]
ENSMUSG00000027364	Usp50	678.928	273.967	1.68039	1.13105e-05	ubiquitin specific peptidase 50 [Source:MGI Symbol;Acc:MGI:1922333]
ENSMUSG00000031834	Pik3r2	23.2164	49.3941	-1.67467	0.0195112	phosphatidylinositol 3-kinase, regulatory subunit, polypeptide 2 (p85 beta) [Source:MGI Symbol;Acc:MGI:1098772]
ENSMUSG00000027203	Dut	112.367	43.9016	1.67444	0.0012483	deoxyuridine triphosphatase [Source:MGI Symbol;Acc:MGI:1346051]
ENSMUSG00000041740	Rnf10	81.5835	193.128	-1.67345	0.000402657	ring finger protein 10 [Source:MGI Symbol;Acc:MGI:1859162]
ENSMUSG00000024589	Nedd4l	122.638	216.761	-1.67325	0.000249824	neural precursor cell expressed, developmentally down-regulated gene 4-like [Source:MGI Symbol;Acc:MGI:1933754]
ENSMUSG00000022142	Nup155	30.6035	73.3402	-1.67198	0.00555484	nucleoporin 155 [Source:MGI Symbol;Acc:MGI:2181182]
ENSMUSG00000028898	Trnau1ap	76.937	31.1039	1.67194	0.00251838	tRNA selenocysteine 1 associated protein 1 [Source:MGI Symbol;Acc:MGI:1919037]
ENSMUSG00000050299	Gm9843	210.589	86.6196	1.66989	0.000222591	predicted gene 9843 [Source:MGI Symbol;Acc:MGI:3708621]
ENSMUSG00000020986	Sec23a	40.8357	84.1138	-1.66813	0.00387141	SEC23A (S. cerevisiae) [Source:MGI Symbol;Acc:MGI:1349635]
ENSMUSG00000030036	Mogs	21.7418	49.1281	-1.66624	0.0230801	mannosyl-oligosaccharide glucosidase [Source:MGI Symbol;Acc:MGI:1929872]
ENSMUSG00000059316	Slc27a4	21.4612	36.0372	-1.66552	0.0348698	solute carrier family 27 (fatty acid transporter), member 4 [Source:MGI Symbol;Acc:MGI:1347347]
ENSMUSG00000022191	Drosha	22.1087	46.8821	-1.66379	0.0172791	drosha, ribonuclease type III [Source:MGI Symbol;Acc:MGI:1261425]
ENSMUSG00000038252	Ncapd2	32.7305	56.0439	-1.66345	0.029033	non-SMC condensin I complex, subunit D2 [Source:MGI Symbol;Acc:MGI:1915548]
ENSMUSG00000074796	Slc4a11	162.274	321.476	-1.66334	6.00469e-05	solute carrier family 4, sodium bicarbonate transporter-like, member 11 [Source:MGI Symbol;Acc:MGI:2138987]
ENSMUSG00000020368	Canx	303.271	573.14	-1.65899	0.000240474	calnexin [Source:MGI Symbol;Acc:MGI:88261]
ENSMUSG00000037286	Stag1	34.6186	62.1151	-1.65875	0.00764776	stromal antigen 1 [Source:MGI Symbol;Acc:MGI:1098658]
ENSMUSG00000044783	Hjurp	45.2725	81.9381	-1.65789	0.00653864	Holliday junction recognition protein [Source:MGI Symbol;Acc:MGI:2685821]
ENSMUSG00000036435	Exoc1	20.2984	56.8491	-1.65771	0.0494751	exocyst complex component 1 [Source:MGI Symbol;Acc:MGI:2445020]
ENSMUSG00000028211	Trp53inp1	27.659	41.4751	-1.65753	0.0302933	transformation related protein 53 inducible nuclear protein 1 [Source:MGI Symbol;Acc:MGI:1926609]
ENSMUSG00000034190	Chmp7	96.6748	151.802	-1.65675	0.000405163	charged multivesicular body protein 7 [Source:MGI Symbol;Acc:MGI:1913922]
ENSMUSG00000021967	Mrpl57	146.374	60.0294	1.65667	0.000740271	mitochondrial ribosomal protein L53 [Source:MGI Symbol;Acc:MGI:1915090]
ENSMUSG00000028649	Macf1	133.477	407.768	-1.65445	0.000144613	microtubule-actin crosslinking factor 1 [Source:MGI Symbol;Acc:MGI:108559]
ENSMUSG00000004056	Akt2	23.9664	66.6665	-1.65264	0.01121	thymoma viral proto-oncogene 2 [Source:MGI Symbol;Acc:MGI:104874]
ENSMUSG00000084174	Sycn	40.0859	15.3685	1.65242	0.0464384	syncollin [Source:MGI Symbol;Acc:MGI:1915666]
ENSMUSG00000006498	Ptbp1	379.062	811.861	-1.6501	0.000189868	polypyrimidine tract binding protein 1 [Source:MGI Symbol;Acc:MGI:97791]
ENSMUSG00000040720	1110037F02Rik	22.3105	59.6759	-1.64764	0.0171536	RIKEN cDNA 1110037F02 gene [Source:MGI Symbol;Acc:MGI:1913435]
ENSMUSG00000020271	Fbxw11	35.256	100.771	-1.64676	0.00331401	F-box and WD-40 domain protein 11 [Source:MGI Symbol;Acc:MGI:2144023]
ENSMUSG00000020064	Herc4	92.1565	189.122	-1.64638	0.000519243	hect domain and RLD 4 [Source:MGI Symbol;Acc:MGI:1914595]
ENSMUSG00000044468	Fam46c	70.5485	147.579	-1.64628	0.00597209	family with sequence similarity 46, member C [Source:MGI Symbol;Acc:MGI:1921895]
ENSMUSG00000031832	Taf1c	61.216	101.498	-1.64511	0.00162881	TATA box binding protein (Tbp)-associated factor, RNA polymerase I, C [Source:MGI Symbol;Acc:MGI:109576]
ENSMUSG00000028656	Cap1	43.8395	105.259	-1.6437	0.00247915	CAP, adenylate cyclase-associated protein 1 (yeast) [Source:MGI Symbol;Acc:MGI:88262]
ENSMUSG00000020549	Elac2	35.5964	86.4305	-1.64239	0.00580817	elaC homolog 2 (E. coli) [Source:MGI Symbol;Acc:MGI:1890496]
ENSMUSG00000032264	Zw10	26.7736	51.7382	-1.64167	0.0177236	zw10 kinetochore protein [Source:MGI Symbol;Acc:MGI:1349478]
ENSMUSG00000035437	Rabgap1	25.8481	59.1405	-1.64135	0.0118225	RAB GTPase activating protein 1 [Source:MGI Symbol;Acc:MGI:2385139]
ENSMUSG00000020219	Timm13	205.842	84.0841	1.64079	0.000222591	translocase of inner mitochondrial membrane 13 [Source:MGI Symbol;Acc:MGI:1353432]
ENSMUSG00000024959	Bad	94.997	36.3204	1.63967	0.00147317	BCL2-associated agonist of cell death [Source:MGI Symbol;Acc:MGI:1096330]
ENSMUSG00000036046	5031439G07Rik	112.688	216.382	-1.63861	0.000150807	RIKEN cDNA 5031439G07 gene [Source:MGI Symbol;Acc:MGI:2444899]
ENSMUSG00000025159	Mms19	24.1375	41.2399	-1.63829	0.0405521	MMS19 (MET18 S. cerevisiae) [Source:MGI Symbol;Acc:MGI:1919449]
ENSMUSG00000022817	Itgb5	165.269	349.009	-1.63638	0.0021021	integrin beta 5 [Source:MGI Symbol;Acc:MGI:96614]
ENSMUSG00000004099	Dnmt1	15.953	44.6951	-1.63595	0.0400753	DNA methyltransferase (cytosine-5) 1 [Source:MGI Symbol;Acc:MGI:94912]
ENSMUSG00000028580	Pum1	84.1577	201.389	-1.63474	0.000317974	pumilio RNA-binding family member 1 [Source:MGI Symbol;Acc:MGI:1931749]
ENSMUSG00000027933	Ints3	31.8526	65.9181	-1.63323	0.0128231	integrator complex subunit 3 [Source:MGI Symbol;Acc:MGI:2140050]
ENSMUSG00000039782	Cpeb2	42.2913	77.6639	-1.63182	0.00986877	cytoplasmic polyadenylation element binding protein 2 [Source:MGI Symbol;Acc:MGI:2442640]
ENSMUSG00000033454	Zbtb1	17.5008	53.5086	-1.63072	0.0187614	zinc finger and BTB domain containing 1 [Source:MGI Symbol;Acc:MGI:2442326]
ENSMUSG00000037331	Larp1	288.466	639.777	-1.63054	3.64438e-05	La ribonucleoprotein domain family, member 1 [Source:MGI Symbol;Acc:MGI:1890165]
ENSMUSG00000003458	Ncstn	23.4824	40.9988	-1.6253	0.0358834	nicastrin [Source:MGI Symbol;Acc:MGI:1891700]
ENSMUSG00000009112	Bcl2l13	48.9307	117.881	-1.62496	0.00699139	BCL2-like 13 (apoptosis facilitator) [Source:MGI Symbol;Acc:MGI:2136959]
ENSMUSG00000029032	Arhgef16	64.0828	144.555	-1.62403	0.00274855	Rho guanine nucleotide exchange factor (GEF) 16 [Source:MGI Symbol;Acc:MGI:2446219]
ENSMUSG00000036893	Ehmt1	43.7497	80.7988	-1.61875	0.00323255	euchromatic histone methyltransferase 1 [Source:MGI Symbol;Acc:MGI:1924933]
ENSMUSG00000074476	Spc24	87.5196	36.0104	1.61671	0.00167548	SPC24, NDC80 kinetochore complex component, homolog (S. cerevisiae) [Source:MGI Symbol;Acc:MGI:1914879]
ENSMUSG00000028271	Gtf2b	101.403	37.5268	1.61622	0.00175697	general transcription factor IIB [Source:MGI Symbol;Acc:MGI:2385191]
ENSMUSG00000074746	Pdzd8	23.0328	46.7885	-1.61422	0.0269386	PDZ domain containing 8 [Source:MGI Symbol;Acc:MGI:2677270]
ENSMUSG00000027893	Ahcyl1	34.5203	75.1281	-1.61331	0.00799467	S-adenosylhomocysteine hydrolase-like 1 [Source:MGI Symbol;Acc:MGI:2385184]
ENSMUSG00000015013	Trappc2l	153.031	65.5304	1.61319	0.000332248	trafficking protein particle complex 2-like [Source:MGI Symbol;Acc:MGI:1916295]
ENSMUSG00000033644	Piwil2	52.8495	71.4784	-1.61188	0.0163781	piwi-like RNA-mediated gene silencing 2 [Source:MGI Symbol;Acc:MGI:1930036]
ENSMUSG00000033105	Lss	65.1883	110.476	-1.61008	0.00234866	lanosterol synthase [Source:MGI Symbol;Acc:MGI:1336155]
ENSMUSG00000012535	Tnpo3	117.772	202.606	-1.60894	0.000318007	transportin 3 [Source:MGI Symbol;Acc:MGI:1196412]
ENSMUSG00000022394	L3mbtl2	57.17	138.499	-1.60875	0.00140931	l(3)mbt-like 2 (Drosophila) [Source:MGI Symbol;Acc:MGI:2443584]
ENSMUSG00000059486	Kbtbd2	19.9998	44.3288	-1.60843	0.0294766	kelch repeat and BTB (POZ) domain containing 2 [Source:MGI Symbol;Acc:MGI:2384811]
ENSMUSG00000029482	Aacs	222.392	366.658	-1.60654	0.000230275	acetoacetyl-CoA synthetase [Source:MGI Symbol;Acc:MGI:1926144]
ENSMUSG00000002227	Mov10	29.0007	72.6498	-1.60589	0.0150011	Moloney leukemia virus 10 [Source:MGI Symbol;Acc:MGI:97054]
ENSMUSG00000046949	Nqo2	51.8669	17.0085	1.6042	0.0177229	NAD(P)H dehydrogenase, quinone 2 [Source:MGI Symbol;Acc:MGI:104513]
ENSMUSG00000025474	Tubgcp2	30.8991	31.9106	-1.60388	0.0326547	tubulin, gamma complex associated protein 2 [Source:MGI Symbol;Acc:MGI:1921487]
ENSMUSG00000035828	Pim3	105.552	220.43	-1.60155	0.000351307	proviral integration site 3 [Source:MGI Symbol;Acc:MGI:1355297]
ENSMUSG00000063077	Kif1b	29.7036	78.8403	-1.60042	0.00878448	kinesin family member 1B [Source:MGI Symbol;Acc:MGI:108426]
ENSMUSG00000050240	Hic2	34.9783	71.26	-1.59941	0.00688424	hypermethylated in cancer 2 [Source:MGI Symbol;Acc:MGI:1929869]
ENSMUSG00000050052	Tdrp	54.29	135.103	-1.59656	0.0094372	testis development related protein [Source:MGI Symbol;Acc:MGI:1919398]
ENSMUSG00000036202	Rif1	260.198	569.777	-1.59576	8.20756e-05	Rap1 interacting factor 1 homolog (yeast) [Source:MGI Symbol;Acc:MGI:1098622]
ENSMUSG00000020937	Plcd3	36.0354	61.9971	-1.59512	0.0120112	phospholipase C, delta 3 [Source:MGI Symbol;Acc:MGI:107451]
ENSMUSG00000006705	Pknox1	89.3393	180.194	-1.59504	0.00083477	Pbx/knotted 1 homeobox [Source:MGI Symbol;Acc:MGI:1201409]
ENSMUSG00000031540	Kat6a	23.911	53.5594	-1.59337	0.0233126	K(lysine) acetyltransferase 6A [Source:MGI Symbol;Acc:MGI:2442415]
ENSMUSG00000034450	Gulo	478.963	893.055	-1.59174	0.000222591	gulonolactone (L-) oxidase [Source:MGI Symbol;Acc:MGI:1353434]
ENSMUSG00000043110	Lrrn4	30.5442	48.187	-1.59143	0.021566	leucine rich repeat neuronal 4 [Source:MGI Symbol;Acc:MGI:2445154]
ENSMUSG00000036822	Topors	73.9263	177.201	-1.59066	0.000990307	topoisomerase I binding, arginine/serine-rich [Source:MGI Symbol;Acc:MGI:2146189]
ENSMUSG00000032434	Cmtm6	86.0605	129.135	-1.58908	0.00333732	CKLF-like MARVEL transmembrane domain containing 6 [Source:MGI Symbol;Acc:MGI:2447165]
ENSMUSG00000020400	Tnip1	23.2317	39.3308	-1.58494	0.0357999	TNFAIP3 interacting protein 1 [Source:MGI Symbol;Acc:MGI:1926194]
ENSMUSG00000040112	Mrps35	56.9032	22.7488	1.58484	0.0139309	mitochondrial ribosomal protein S35 [Source:MGI Symbol;Acc:MGI:2385255]
ENSMUSG00000032998	Foxj3	23.2517	53.4524	-1.58476	0.0306235	forkhead box J3 [Source:MGI Symbol;Acc:MGI:2443432]
ENSMUSG00000059734	Ndufs8	231.406	94.541	1.5846	0.000170742	NADH dehydrogenase (ubiquinone) Fe-S protein 8 [Source:MGI Symbol;Acc:MGI:2385079]
ENSMUSG00000032571	Pik3r4	27.3705	38.0218	-1.584	0.0436787	phosphatidylinositol 3 kinase, regulatory subunit, polypeptide 4, p150 [Source:MGI Symbol;Acc:MGI:1922919]
ENSMUSG00000060032	H2afj	84.2798	34.6142	1.58222	0.00889877	H2A histone family, member J [Source:MGI Symbol;Acc:MGI:3606192]
ENSMUSG00000022013	Dnajc15	240.07	104.665	1.58186	0.000172322	DnaJ (Hsp40) homolog, subfamily C, member 15 [Source:MGI Symbol;Acc:MGI:1913398]
ENSMUSG00000037012	Hk1	79.7345	88.8705	-1.58012	0.00883604	hexokinase 1 [Source:MGI Symbol;Acc:MGI:96103]
ENSMUSG00000032293	Ireb2	26.0852	58.4341	-1.57893	0.0234599	iron responsive element binding protein 2 [Source:MGI Symbol;Acc:MGI:1928268]
ENSMUSG00000033335	Dnm2	96.2965	131.132	-1.57859	0.00145791	dynamin 2 [Source:MGI Symbol;Acc:MGI:109547]
ENSMUSG00000095136	Gm12616	347.693	133.686	1.57838	0.000324177	predicted gene 12616 [Source:MGI Symbol;Acc:MGI:3649883]
ENSMUSG00000015647	Lama5	19.0766	51.967	-1.57811	0.0354551	laminin, alpha 5 [Source:MGI Symbol;Acc:MGI:105382]
ENSMUSG00000017548	Suz12	87.1668	246.352	-1.57757	0.000480038	suppressor of zeste 12 homolog (Drosophila) [Source:MGI Symbol;Acc:MGI:1261758]
ENSMUSG00000061751	Kalrn	22.3578	60.5267	-1.57754	0.023028	kalirin, RhoGEF kinase [Source:MGI Symbol;Acc:MGI:2685385]
ENSMUSG00000001555	Fkbp10	25.6261	41.0323	-1.57683	0.0420043	FK506 binding protein 10 [Source:MGI Symbol;Acc:MGI:104769]
ENSMUSG00000029657	Hsph1	58.4815	94.3173	-1.57499	0.00886554	heat shock 105kDa/110kDa protein 1 [Source:MGI Symbol;Acc:MGI:105053]
ENSMUSG00000026806	Ddx31	19.6478	42.522	-1.57493	0.0365112	DEAD/H (Asp-Glu-Ala-Asp/His) box polypeptide 31 [Source:MGI Symbol;Acc:MGI:2682639]
ENSMUSG00000029407	Uso1	30.0757	60.0055	-1.57485	0.0116479	USO1 vesicle docking factor [Source:MGI Symbol;Acc:MGI:1929095]
ENSMUSG00000022601	Zbtb11	107.537	190.446	-1.57455	0.000423699	zinc finger and BTB domain containing 11 [Source:MGI Symbol;Acc:MGI:2443876]
ENSMUSG00000056579	Tug1	13.7931	49.4751	-1.57428	0.0346036	taurine upregulated gene 1 [Source:MGI Symbol;Acc:MGI:2144114]
ENSMUSG00000028514	Usp24	18.4455	58.8801	-1.57344	0.0234181	ubiquitin specific peptidase 24 [Source:MGI Symbol;Acc:MGI:1919936]
ENSMUSG00000027397	Slc20a1	28.8108	40.5944	-1.57249	0.0441097	solute carrier family 20, member 1 [Source:MGI Symbol;Acc:MGI:108392]
ENSMUSG00000041915	Ammecr1l	107.879	168.406	-1.57208	0.00060718	AMME chromosomal region gene 1-like [Source:MGI Symbol;Acc:MGI:2442711]
ENSMUSG00000020184	Mdm2	21.656	49.1857	-1.57082	0.0244963	transformed mouse 3T3 cell double minute 2 [Source:MGI Symbol;Acc:MGI:96952]
ENSMUSG00000012443	Kif11	101.115	209.998	-1.56788	0.000536386	kinesin family member 11 [Source:MGI Symbol;Acc:MGI:1098231]
ENSMUSG00000078087	Rps12l1	130.241	55.0117	1.56676	0.00397085	ribosomal protein S12-like 1 [Source:MGI Symbol;Acc:MGI:3783241]
ENSMUSG00000031446	Cul4a	45.9801	89.5227	-1.56569	0.00486335	cullin 4A [Source:MGI Symbol;Acc:MGI:1914487]
ENSMUSG00000027365	Trpm7	36.5296	99.9656	-1.56563	0.00594177	transient receptor potential cation channel, subfamily M, member 7 [Source:MGI Symbol;Acc:MGI:1929996]
ENSMUSG00000096255	Dynlt1b	104.305	42.6271	1.56362	0.00226121	dynein light chain Tctex-type 1B [Source:MGI Symbol;Acc:MGI:98643]
ENSMUSG00000033985	Tesk2	20.0835	48.8384	-1.56252	0.0250491	testis-specific kinase 2 [Source:MGI Symbol;Acc:MGI:2385204]
ENSMUSG00000032462	Pik3cb	136.271	234.422	-1.5617	0.000401906	phosphatidylinositol 3-kinase, catalytic, beta polypeptide [Source:MGI Symbol;Acc:MGI:1922019]
ENSMUSG00000005374	Tbl2	65.6022	136.734	-1.55991	0.00809114	transducin (beta)-like 2 [Source:MGI Symbol;Acc:MGI:1351652]
ENSMUSG00000073198	Gm10480	42.4551	18.0413	1.5586	0.0404705	predicted gene 10480 [Source:MGI Symbol;Acc:MGI:3642435]
ENSMUSG00000018209	Stk4	53.348	96.7932	-1.55858	0.00859133	serine/threonine kinase 4 [Source:MGI Symbol;Acc:MGI:1929004]
ENSMUSG00000066148	Prpf4	30.9454	63.4416	-1.55682	0.0139742	PRP4 pre-mRNA processing factor 4 homolog (yeast) [Source:MGI Symbol;Acc:MGI:1917302]
ENSMUSG00000024180	Tmem8	20.4409	55.2553	-1.55441	0.0342668	transmembrane protein 8 (five membrane-spanning domains) [Source:MGI Symbol;Acc:MGI:1926283]
ENSMUSG00000063870	Chd4	50.6899	117.006	-1.55232	0.00287436	chromodomain helicase DNA binding protein 4 [Source:MGI Symbol;Acc:MGI:1344380]
ENSMUSG00000005161	Prdx2	68.3769	26.7173	1.5504	0.00925793	peroxiredoxin 2 [Source:MGI Symbol;Acc:MGI:109486]
ENSMUSG00000028893	Sesn2	43.317	71.1326	-1.5501	0.00848445	sestrin 2 [Source:MGI Symbol;Acc:MGI:2651874]
ENSMUSG00000023971	Rrp36	92.7398	39.7556	1.54601	0.00218298	ribosomal RNA processing 36 homolog (S. cerevisiae) [Source:MGI Symbol;Acc:MGI:2385053]
ENSMUSG00000059278	Naa38	85.4715	38.0712	1.54507	0.0085394	N(alpha)-acetyltransferase 38, NatC auxiliary subunit [Source:MGI Symbol;Acc:MGI:1925554]
ENSMUSG00000020224	Llph	256.929	106.33	1.5448	0.000136834	LLP homolog, long-term synaptic facilitation (Aplysia) [Source:MGI Symbol;Acc:MGI:1913475]
ENSMUSG00000021048	Mthfd1	126.411	162.072	-1.54423	0.000503311	methylenetetrahydrofolate dehydrogenase (NADP+ dependent), methenyltetrahydrofolate cyclohydrolase, formyltetrahydrofolate synthase [Source:MGI Symbol;Acc:MGI:1342005]
ENSMUSG00000029722	Agfg2	21.918	41.8879	-1.54408	0.0393776	ArfGAP with FG repeats 2 [Source:MGI Symbol;Acc:MGI:2443267]
ENSMUSG00000047412	Zbtb44	77.1484	200.871	-1.54365	0.00118365	zinc finger and BTB domain containing 44 [Source:MGI Symbol;Acc:MGI:1925123]
ENSMUSG00000032398	Snapc5	155.034	68.5468	1.54247	0.000552019	small nuclear RNA activating complex, polypeptide 5 [Source:MGI Symbol;Acc:MGI:1914282]
ENSMUSG00000022685	Parn	29.1954	63.9315	-1.54188	0.01502	poly(A)-specific ribonuclease (deadenylation nuclease) [Source:MGI Symbol;Acc:MGI:1921358]
ENSMUSG00000035642	Aamdc	36.019	15.8067	1.54134	0.0442888	adipogenesis associated Mth938 domain containing [Source:MGI Symbol;Acc:MGI:1913523]
ENSMUSG00000034168	Irf2bpl	37.7687	77.0488	-1.5413	0.0153944	interferon regulatory factor 2 binding protein-like [Source:MGI Symbol;Acc:MGI:2442463]
ENSMUSG00000009585	Apobec3	25.15	41.1732	-1.53963	0.0330341	apolipoprotein B mRNA editing enzyme, catalytic polypeptide 3 [Source:MGI Symbol;Acc:MGI:1933111]
ENSMUSG00000024812	Tjp2	70.1733	101.051	-1.53961	0.00431351	tight junction protein 2 [Source:MGI Symbol;Acc:MGI:1341872]
ENSMUSG00000039065	Fam173b	56.0551	23.608	1.53911	0.0131967	family with sequence similarity 173, member B [Source:MGI Symbol;Acc:MGI:1915323]
ENSMUSG00000053470	Kdm3a	68.5155	148.776	-1.53874	0.0125921	lysine (K)-specific demethylase 3A [Source:MGI Symbol;Acc:MGI:98847]
ENSMUSG00000068240	Gm11808	212.368	93.1147	1.53839	0.00355722	predicted gene 11808 [Source:MGI Symbol;Acc:MGI:3649356]
ENSMUSG00000033307	Mif	349.55	145.966	1.53833	0.000541001	macrophage migration inhibitory factor [Source:MGI Symbol;Acc:MGI:96982]
ENSMUSG00000032105	Pdzd3	33.7338	66.2228	-1.53757	0.0296646	PDZ domain containing 3 [Source:MGI Symbol;Acc:MGI:2429554]
ENSMUSG00000030533	Unc45a	30.2763	75.1884	-1.53312	0.0104463	unc-45 homolog A (C. elegans) [Source:MGI Symbol;Acc:MGI:2142246]
ENSMUSG00000026064	Ptp4a1	512.162	1022.8	-1.53294	0.000449703	protein tyrosine phosphatase 4a1 [Source:MGI Symbol;Acc:MGI:1277096]
ENSMUSG00000022565	Plec	18.9966	55.2398	-1.53148	0.0272707	plectin [Source:MGI Symbol;Acc:MGI:1277961]
ENSMUSG00000040658	Dnph1	45.2214	19.3633	1.53122	0.0413297	2'-deoxynucleoside 5'-phosphate N-hydrolase 1 [Source:MGI Symbol;Acc:MGI:3039376]
ENSMUSG00000067719	Gm10221	113.423	47.7824	1.53009	0.00399702	predicted gene 10221 [Source:MGI Symbol;Acc:MGI:3708709]
ENSMUSG00000037415	Ranbp10	54.3103	124.939	-1.52995	0.00282902	RAN binding protein 10 [Source:MGI Symbol;Acc:MGI:1921584]
ENSMUSG00000020859	Spag9	42.8499	77.4019	-1.52921	0.0092935	sperm associated antigen 9 [Source:MGI Symbol;Acc:MGI:1918084]
ENSMUSG00000063450	Syne2	43.2793	107.008	-1.52796	0.00627031	spectrin repeat containing, nuclear envelope 2 [Source:MGI Symbol;Acc:MGI:2449316]
ENSMUSG00000041846	Smek1	68.382	127.292	-1.52778	0.00301816	SMEK homolog 1, suppressor of mek1 (Dictyostelium) [Source:MGI Symbol;Acc:MGI:1915984]
ENSMUSG00000013833	Med16	31.0366	37.0515	-1.52765	0.0324855	mediator complex subunit 16 [Source:MGI Symbol;Acc:MGI:2158394]
ENSMUSG00000026496	Parp1	272.89	458.011	-1.5251	0.000214988	poly (ADP-ribose) polymerase family, member 1 [Source:MGI Symbol;Acc:MGI:1340806]
ENSMUSG00000028920	Fbxo42	37.1666	57.3274	-1.5239	0.0171105	F-box protein 42 [Source:MGI Symbol;Acc:MGI:1924992]
ENSMUSG00000031516	Dctn6	54.994	24.9673	1.52356	0.0131725	dynactin 6 [Source:MGI Symbol;Acc:MGI:1343154]
ENSMUSG00000040532	Abhd11	67.8526	28.4231	1.52155	0.00869422	abhydrolase domain containing 11 [Source:MGI Symbol;Acc:MGI:1916008]
ENSMUSG00000039231	Suv39h1	41.4818	62.5096	-1.5203	0.021607	suppressor of variegation 3-9 homolog 1 (Drosophila) [Source:MGI Symbol;Acc:MGI:1099440]
ENSMUSG00000063856	Gpx1	649.832	258.819	1.52019	0.00057864	glutathione peroxidase 1 [Source:MGI Symbol;Acc:MGI:104887]
ENSMUSG00000072109	A530040E14Rik	72.2605	30.5844	1.52012	0.0165922	RIKEN cDNA A530040E14 gene [Source:MGI Symbol;Acc:MGI:3612703]
ENSMUSG00000074886	Grk6	78.238	149.625	-1.51891	0.00218338	G protein-coupled receptor kinase 6 [Source:MGI Symbol;Acc:MGI:1347078]
ENSMUSG00000023106	Denr	297.515	125.048	1.51837	8.777e-05	density-regulated protein [Source:MGI Symbol;Acc:MGI:1915434]
ENSMUSG00000024045	Akap8	175.941	362.716	-1.51712	0.000214488	A kinase (PRKA) anchor protein 8 [Source:MGI Symbol;Acc:MGI:1928488]
ENSMUSG00000025133	Ints4	92.4471	144.918	-1.51679	0.00408023	integrator complex subunit 4 [Source:MGI Symbol;Acc:MGI:1917164]
ENSMUSG00000034345	Gtf2h5	261.792	118.408	1.51617	0.000255136	general transcription factor IIH, polypeptide 5 [Source:MGI Symbol;Acc:MGI:107227]
ENSMUSG00000016344	Ppdpf	49.5358	20.8668	1.51527	0.0336276	pancreatic progenitor cell differentiation and proliferation factor homolog (zebrafish)RIKEN cDNA 2700038C09 gene [Source:MGI Symbol;Acc:MGI:1913746]
ENSMUSG00000040034	Nup43	193.824	82.6214	1.51503	0.000278805	nucleoporin 43 [Source:MGI Symbol;Acc:MGI:1917162]
ENSMUSG00000021488	Nsd1	40.4931	111.092	-1.51422	0.00685968	nuclear receptor-binding SET-domain protein 1 [Source:MGI Symbol;Acc:MGI:1276545]
ENSMUSG00000021068	Nin	235.669	486.458	-1.51396	0.000332248	ninein [Source:MGI Symbol;Acc:MGI:105108]
ENSMUSG00000041747	Utp15	66.1735	109.428	-1.51359	0.00396573	UTP15, U3 small nucleolar ribonucleoprotein, homolog (yeast) [Source:MGI Symbol;Acc:MGI:2145443]
ENSMUSG00000002814	Top3a	25.0525	43.3353	-1.51345	0.0325731	topoisomerase (DNA) III alpha [Source:MGI Symbol;Acc:MGI:1197527]
ENSMUSG00000027523	Gnas	68.2616	100.959	-1.51306	0.00447192	GNAS (guanine nucleotide binding protein, alpha stimulating) complex locus [Source:MGI Symbol;Acc:MGI:95777]
ENSMUSG00000031903	Pla2g15	228.439	487.857	-1.51251	0.000249824	phospholipase A2, group XV [Source:MGI Symbol;Acc:MGI:2178076]
ENSMUSG00000017765	Slc12a4	31.8793	61.2074	-1.512	0.0159254	solute carrier family 12, member 4 [Source:MGI Symbol;Acc:MGI:1309465]
ENSMUSG00000005936	Kctd20	64.8899	110.241	-1.51141	0.00351518	potassium channel tetramerisation domain containing 20 [Source:MGI Symbol;Acc:MGI:1914239]
ENSMUSG00000028434	Epb4.1l4b	116.147	148.633	-1.51061	0.0324626	erythrocyte protein band 4.1-like 4b [Source:MGI Symbol;Acc:MGI:1859149]
ENSMUSG00000026491	Ahctf1	62.9247	131.304	-1.51059	0.00351859	AT hook containing transcription factor 1 [Source:MGI Symbol;Acc:MGI:1915033]
ENSMUSG00000085868	Gm13632	207.427	72.9698	1.50963	0.000294153	predicted gene 13632 [Source:MGI Symbol;Acc:MGI:3651357]
ENSMUSG00000024140	Epas1	105.703	174.009	-1.50895	0.00393665	endothelial PAS domain protein 1 [Source:MGI Symbol;Acc:MGI:109169]
ENSMUSG00000070002	Ell	33.1043	52.878	-1.5074	0.0201776	elongation factor RNA polymerase II [Source:MGI Symbol;Acc:MGI:109377]
ENSMUSG00000036873	2410004B18Rik	80.8149	36.616	1.50615	0.00424349	RIKEN cDNA 2410004B18 gene [Source:MGI Symbol;Acc:MGI:1913671]
ENSMUSG00000003051	Elf3	54.3142	78.2259	-1.50582	0.016446	E74-like factor 3 [Source:MGI Symbol;Acc:MGI:1101781]
ENSMUSG00000024104	Fam21	85.5983	179.53	-1.50558	0.00137383	family with sequence similarity 21 [Source:MGI Symbol;Acc:MGI:106463]
ENSMUSG00000012114	Med15	20.554	43.4907	-1.50555	0.0462275	mediator complex subunit 15 [Source:MGI Symbol;Acc:MGI:2137379]
ENSMUSG00000070493	Chchd2	1390.02	604.3	1.50425	0.000222283	coiled-coil-helix-coiled-coil-helix domain containing 2 [Source:MGI Symbol;Acc:MGI:1261428]
ENSMUSG00000037851	Iars	91.0715	136.057	-1.5039	0.00324151	isoleucine-tRNA synthetase [Source:MGI Symbol;Acc:MGI:2145219]
ENSMUSG00000040767	Snrnp25	85.4784	37.0713	1.50389	0.00945044	small nuclear ribonucleoprotein 25 (U11/U12) [Source:MGI Symbol;Acc:MGI:1925622]
ENSMUSG00000028960	Ube4b	39.4876	87.8733	-1.50363	0.0115209	ubiquitination factor E4B [Source:MGI Symbol;Acc:MGI:1927086]
ENSMUSG00000043483	Gm6863	395.865	174.402	1.50356	8.05534e-05	predicted gene 6863 [Source:MGI Symbol;Acc:MGI:3647386]
ENSMUSG00000038773	Kdm3b	36.004	82.0706	-1.50342	0.00946589	KDM3B lysine (K)-specific demethylase 3B [Source:MGI Symbol;Acc:MGI:1923356]
ENSMUSG00000100944		65.893	29.0973	1.50325	0.0112309
ENSMUSG00000020929	Eftud2	172.509	311.377	-1.50308	0.000552019	elongation factor Tu GTP binding domain containing 2 [Source:MGI Symbol;Acc:MGI:1336880]
ENSMUSG00000015341	Golga7	258.596	88.4463	1.50304	0.000223049	golgi autoantigen, golgin subfamily a, 7 [Source:MGI Symbol;Acc:MGI:1931029]
ENSMUSG00000025326	Ube3a	37.2994	63.836	-1.50217	0.0389305	ubiquitin protein ligase E3A [Source:MGI Symbol;Acc:MGI:105098]
ENSMUSG00000087260	Lamtor5	141.207	57.7249	1.50145	0.00234323	late endosomal/lysosomal adaptor, MAPK and MTOR activator 5 [Source:MGI Symbol;Acc:MGI:1915826]
ENSMUSG00000031314	Taf1	55.9303	115.284	-1.50108	0.00564844	TAF1 RNA polymerase II, TATA box binding protein (TBP)-associated factor [Source:MGI Symbol;Acc:MGI:1336878]
ENSMUSG00000002416	Ndufb2	110.277	48.4093	1.50036	0.00361933	NADH dehydrogenase (ubiquinone) 1 beta subcomplex, 2 [Source:MGI Symbol;Acc:MGI:1915448]
ENSMUSG00000046201	Scaf8	35.7307	50.0767	-1.4991	0.0208556	SR-related CTD-associated factor 8 [Source:MGI Symbol;Acc:MGI:1925212]
ENSMUSG00000053838	Nudcd3	56.9182	135.566	-1.496	0.00309448	NudC domain containing 3 [Source:MGI Symbol;Acc:MGI:2144158]
ENSMUSG00000079260	Tmppe	462.432	822.891	-1.49082	0.000302386	transmembrane protein with metallophosphoesterase domain [Source:MGI Symbol;Acc:MGI:5317335]
ENSMUSG00000021911	Parg	175.974	317.164	-1.49	0.000351921	poly (ADP-ribose) glycohydrolase [Source:MGI Symbol;Acc:MGI:1347094]
ENSMUSG00000031386	Hcfc1	90.1771	181.9	-1.48667	0.00137383	host cell factor C1 [Source:MGI Symbol;Acc:MGI:105942]
ENSMUSG00000042410	Agps	73.9419	83.7706	-1.48653	0.00651009	alkylglycerone phosphate synthase [Source:MGI Symbol;Acc:MGI:2443065]
ENSMUSG00000044285	Gm1821	906.074	404.998	1.48596	0.000104523	predicted gene 1821 [Source:MGI Symbol;Acc:MGI:3037679]
ENSMUSG00000029516	Cit	45.6216	106.339	-1.48507	0.00569482	citron [Source:MGI Symbol;Acc:MGI:105313]
ENSMUSG00000040620	Dhx33	53.2625	94.4806	-1.48265	0.00643125	DEAH (Asp-Glu-Ala-His) box polypeptide 33 [Source:MGI Symbol;Acc:MGI:2445102]
ENSMUSG00000048429	1810026J23Rik	35.9235	62.2584	-1.48152	0.0169991	RIKEN cDNA 1810026J23 gene [Source:MGI Symbol;Acc:MGI:1917023]
ENSMUSG00000010277	2610507B11Rik	61.865	152.92	-1.48101	0.00327945	RIKEN cDNA 2610507B11 gene [Source:MGI Symbol;Acc:MGI:1919753]
ENSMUSG00000027363	Usp8	76.3604	97.7461	-1.48099	0.00878341	ubiquitin specific peptidase 8 [Source:MGI Symbol;Acc:MGI:1934029]
ENSMUSG00000038084	Opa1	29.319	52.7014	-1.48065	0.0241114	optic atrophy 1 [Source:MGI Symbol;Acc:MGI:1921393]
ENSMUSG00000005609	Ctr9	74.7536	144.1	-1.48034	0.00563923	Ctr9, Paf1/RNA polymerase II complex component, homolog (S. cerevisiae) [Source:MGI Symbol;Acc:MGI:109345]
ENSMUSG00000033499	Larp4b	103.342	210.804	-1.47889	0.000964795	La ribonucleoprotein domain family, member 4B [Source:MGI Symbol;Acc:MGI:106330]
ENSMUSG00000030374	Strn4	28.0807	51.7596	-1.47796	0.0317871	striatin, calmodulin binding protein 4 [Source:MGI Symbol;Acc:MGI:2142346]
ENSMUSG00000032902	Slc16a1	23.8693	44.7453	-1.4778	0.0474406	solute carrier family 16 (monocarboxylic acid transporters), member 1 [Source:MGI Symbol;Acc:MGI:106013]
ENSMUSG00000022503	Nubp1	85.847	35.5124	1.4775	0.00924559	nucleotide binding protein 1 [Source:MGI Symbol;Acc:MGI:1347073]
ENSMUSG00000019996	Map7	167.507	374.48	-1.47723	0.000252455	microtubule-associated protein 7 [Source:MGI Symbol;Acc:MGI:1328328]
ENSMUSG00000029505	Ep400	28.1198	68.522	-1.47586	0.0197429	E1A binding protein p400 [Source:MGI Symbol;Acc:MGI:1276124]
ENSMUSG00000032477	Cdc25a	100.036	186.961	-1.47565	0.00112309	cell division cycle 25A [Source:MGI Symbol;Acc:MGI:103198]
ENSMUSG00000040054	Baz2a	117.728	316.113	-1.47519	0.000403545	bromodomain adjacent to zinc finger domain, 2A [Source:MGI Symbol;Acc:MGI:2151152]
ENSMUSG00000006057	Atp5g1	882.746	404.81	1.47301	0.000408061	ATP synthase, H+ transporting, mitochondrial F0 complex, subunit C1 (subunit 9) [Source:MGI Symbol;Acc:MGI:107653]
ENSMUSG00000025871	4833439L19Rik	46.7638	77.6205	-1.47177	0.00820625	RIKEN cDNA 4833439L19 gene [Source:MGI Symbol;Acc:MGI:1921162]
ENSMUSG00000091896	Ube2d2a	37.5399	78.0504	-1.47164	0.0103773	ubiquitin-conjugating enzyme E2D 2A [Source:MGI Symbol;Acc:MGI:1930715]
ENSMUSG00000000787	Ddx3x	557.05	1130.54	-1.47022	0.0049981	DEAD/H (Asp-Glu-Ala-Asp/His) box polypeptide 3, X-linked [Source:MGI Symbol;Acc:MGI:103064]
ENSMUSG00000041264	Uspl1	24.5893	69.1328	-1.46926	0.0208869	ubiquitin specific peptidase like 1 [Source:MGI Symbol;Acc:MGI:2442342]
ENSMUSG00000062352	Itgb1bp1	119.931	50.8274	1.46866	0.00407407	integrin beta 1 binding protein 1 [Source:MGI Symbol;Acc:MGI:1306802]
ENSMUSG00000021959	Lats2	39.8682	98.7119	-1.46734	0.0199706	large tumor suppressor 2 [Source:MGI Symbol;Acc:MGI:1354386]
ENSMUSG00000020964	Sel1l	34.2786	43.1584	-1.46728	0.0457794	sel-1 suppressor of lin-12-like (C. elegans) [Source:MGI Symbol;Acc:MGI:1329016]
ENSMUSG00000030291	Med21	87.0724	37.2896	1.46721	0.0155512	mediator complex subunit 21 [Source:MGI Symbol;Acc:MGI:1347064]
ENSMUSG00000033799	Fam208b	29.4678	102.324	-1.46651	0.00799467	family with sequence similarity 208, member B [Source:MGI Symbol;Acc:MGI:2145274]
ENSMUSG00000042626	Shc1	26.3089	74.199	-1.4662	0.019523	src homology 2 domain-containing transforming protein C1 [Source:MGI Symbol;Acc:MGI:98296]
ENSMUSG00000033257	Ttll4	22.6668	49.85	-1.46568	0.0421413	tubulin tyrosine ligase-like family, member 4 [Source:MGI Symbol;Acc:MGI:1914784]
ENSMUSG00000033237	Arid2	38.2843	94.8506	-1.4656	0.00780519	AT rich interactive domain 2 (ARID, RFX-like) [Source:MGI Symbol;Acc:MGI:1924294]
ENSMUSG00000050812	AI314180	43.3502	95.4039	-1.46485	0.0123089	expressed sequence AI314180 [Source:MGI Symbol;Acc:MGI:2140220]
ENSMUSG00000032384	Csnk1g1	24.699	58.9656	-1.46455	0.0438391	casein kinase 1, gamma 1 [Source:MGI Symbol;Acc:MGI:2660884]
ENSMUSG00000029918	Mrps33	98.3665	42.7597	1.46304	0.00580817	mitochondrial ribosomal protein S33 [Source:MGI Symbol;Acc:MGI:1338046]
ENSMUSG00000022477	Aco2	156.092	244.448	-1.4615	0.000710468	aconitase 2, mitochondrial [Source:MGI Symbol;Acc:MGI:87880]
ENSMUSG00000029613	Eif2ak1	59.8232	113.029	-1.4601	0.00564935	eukaryotic translation initiation factor 2 alpha kinase 1 [Source:MGI Symbol;Acc:MGI:1353448]
ENSMUSG00000070327	Rnf213	54.7316	110.916	-1.45989	0.0144985	ring finger protein 213 [Source:MGI Symbol;Acc:MGI:1289196]
ENSMUSG00000019857	Asf1a	96.3748	42.6112	1.45904	0.00824143	anti-silencing function 1A histone chaperone [Source:MGI Symbol;Acc:MGI:1913653]
ENSMUSG00000031565	Fgfr1	29.8484	58.3724	-1.45866	0.0428049	fibroblast growth factor receptor 1 [Source:MGI Symbol;Acc:MGI:95522]
ENSMUSG00000035215	Lsm7	141.544	66.5468	1.45826	0.00271019	LSM7 homolog, U6 small nuclear RNA associated (S. cerevisiae) [Source:MGI Symbol;Acc:MGI:1913344]
ENSMUSG00000024213	Nudt3	46.1415	98.976	-1.45669	0.00699139	nudix (nucleotide diphosphate linked moiety X)-type motif 3 [Source:MGI Symbol;Acc:MGI:1928484]
ENSMUSG00000056076	Eif3b	321.143	566.12	-1.45663	0.000552019	eukaryotic translation initiation factor 3, subunit B [Source:MGI Symbol;Acc:MGI:106478]
ENSMUSG00000039515	Ppp2r4	27.9043	50.659	-1.45275	0.0415734	protein phosphatase 2A activator, regulatory subunit B [Source:MGI Symbol;Acc:MGI:1346006]
ENSMUSG00000009292	Trpm2	214.062	85.6531	1.45227	0.00144626	transient receptor potential cation channel, subfamily M, member 2 [Source:MGI Symbol;Acc:MGI:1351901]
ENSMUSG00000066278	Vps37b	55.4648	90.6639	-1.45155	0.0116027	vacuolar protein sorting 37B (yeast) [Source:MGI Symbol;Acc:MGI:1916724]
ENSMUSG00000002546	Golga2	34.898	72.4871	-1.4514	0.0440178	golgi autoantigen, golgin subfamily a, 2 [Source:MGI Symbol;Acc:MGI:2139395]
ENSMUSG00000054312	Mrps21	81.2844	36.477	1.4503	0.00924559	mitochondrial ribosomal protein S21 [Source:MGI Symbol;Acc:MGI:1913542]
ENSMUSG00000021738	Atxn7	35.3046	80.1221	-1.4498	0.0173018	ataxin 7 [Source:MGI Symbol;Acc:MGI:2179277]
ENSMUSG00000029554	Mad1l1	44.1394	96.9861	-1.44972	0.00703196	MAD1 mitotic arrest deficient 1-like 1 [Source:MGI Symbol;Acc:MGI:1341857]
ENSMUSG00000036781	Rps27l	509.796	216.724	1.44905	0.000423162	ribosomal protein S27-like [Source:MGI Symbol;Acc:MGI:1915191]
ENSMUSG00000047824	Pygo2	33.6159	42.555	-1.44878	0.0419269	pygopus 2 [Source:MGI Symbol;Acc:MGI:1916161]
ENSMUSG00000038374	Rbm8a	534.115	244.237	1.44484	7.65818e-05	RNA binding motif protein 8a [Source:MGI Symbol;Acc:MGI:1913129]
ENSMUSG00000096145	Vkorc1	96.8173	41.1422	1.44271	0.00568754	vitamin K epoxide reductase complex, subunit 1 [Source:MGI Symbol;Acc:MGI:106442]
ENSMUSG00000038279	Nop2	190.543	351.486	-1.44221	0.00155394	NOP2 nucleolar protein [Source:MGI Symbol;Acc:MGI:107891]
ENSMUSG00000038970	Lmtk2	26.2849	63.3234	-1.44206	0.025421	lemur tyrosine kinase 2 [Source:MGI Symbol;Acc:MGI:3036247]
ENSMUSG00000015165	Hnrnpl	62.9065	136.909	-1.4403	0.00401383	heterogeneous nuclear ribonucleoprotein L [Source:MGI Symbol;Acc:MGI:104816]
ENSMUSG00000003444	Med29	165.435	77.6214	1.43927	0.00292286	mediator complex subunit 29 [Source:MGI Symbol;Acc:MGI:1914474]
ENSMUSG00000037487	Ubr5	79.14	203.646	-1.43915	0.00190677	ubiquitin protein ligase E3 component n-recognin 5 [Source:MGI Symbol;Acc:MGI:1918040]
ENSMUSG00000039195	1110008P14Rik	49.0576	22.4493	1.43903	0.0498624	RIKEN cDNA 1110008P14 gene [Source:MGI Symbol;Acc:MGI:1920987]
ENSMUSG00000026499	Acbd3	43.1349	74.039	-1.43894	0.0186196	acyl-Coenzyme A binding domain containing 3 [Source:MGI Symbol;Acc:MGI:2181074]
ENSMUSG00000062762	Ei24	82.5975	168.77	-1.43877	0.0031656	etoposide induced 2.4 mRNA [Source:MGI Symbol;Acc:MGI:108090]
ENSMUSG00000015846	Rxra	81.3018	156.795	-1.43646	0.00429707	retinoid X receptor alpha [Source:MGI Symbol;Acc:MGI:98214]
ENSMUSG00000033940	Brk1	191.559	83.4585	1.43498	0.00293408	BRICK1, SCAR/WAVE actin-nucleating complex subunit [Source:MGI Symbol;Acc:MGI:1915406]
ENSMUSG00000069729	Arid1b	21.8032	42.9262	-1.43426	0.0494751	AT rich interactive domain 1B (SWI-like) [Source:MGI Symbol;Acc:MGI:1926129]
ENSMUSG00000095680	Gm12627	378.649	166.742	1.43388	0.0107776	predicted gene 12627 [Source:MGI Symbol;Acc:MGI:3650562]
ENSMUSG00000058355	Abce1	161.394	314.395	-1.43322	0.000659648	ATP-binding cassette, sub-family E (OABP), member 1 [Source:MGI Symbol;Acc:MGI:1195458]
ENSMUSG00000031879	Fam96b	94.8854	40.3449	1.43321	0.00699139	family with sequence similarity 96, member B [Source:MGI Symbol;Acc:MGI:1915773]
ENSMUSG00000074516	Gm10709	106.676	51.168	1.43316	0.00343249	predicted gene 10709 [Source:MGI Symbol;Acc:MGI:3642754]
ENSMUSG00000032637	Atxn2l	55.569	120.177	-1.43253	0.00625134	ataxin 2-like [Source:MGI Symbol;Acc:MGI:2446242]
ENSMUSG00000036977	Anapc10	264.814	117.841	1.43171	0.000278961	anaphase promoting complex subunit 10 [Source:MGI Symbol;Acc:MGI:1916249]
ENSMUSG00000022415	Syngr1	398.351	180.26	1.43154	0.000255136	synaptogyrin 1 [Source:MGI Symbol;Acc:MGI:1328323]
ENSMUSG00000030612	Mrpl46	128.584	59.1688	1.43148	0.00326657	mitochondrial ribosomal protein L46 [Source:MGI Symbol;Acc:MGI:1914558]
ENSMUSG00000024241	Sos1	110.756	227.871	-1.42946	0.00153084	son of sevenless homolog 1 (Drosophila) [Source:MGI Symbol;Acc:MGI:98354]
ENSMUSG00000033653	Vps8	53.8591	93.8199	-1.42828	0.00871326	vacuolar protein sorting 8 homolog (S. cerevisiae) [Source:MGI Symbol;Acc:MGI:2146407]
ENSMUSG00000028843	Sh3bgrl3	110.827	46.3007	1.428	0.00607123	SH3 domain binding glutamic acid-rich protein-like 3 [Source:MGI Symbol;Acc:MGI:1920973]
ENSMUSG00000066478	Gm5745	225.977	95.4289	1.42735	0.00526258	predicted gene 5745 [Source:MGI Symbol;Acc:MGI:3645343]
ENSMUSG00000026568	Mpc2	235.481	109.551	1.4261	0.00164191	mitochondrial pyruvate carrier 2 [Source:MGI Symbol;Acc:MGI:1917706]
ENSMUSG00000036503	Rnf13	65.3254	28.2439	1.42486	0.0304309	ring finger protein 13 [Source:MGI Symbol;Acc:MGI:1346341]
ENSMUSG00000031839	Hsbp1	209.594	86.7056	1.42441	0.00110862	heat shock factor binding protein 1 [Source:MGI Symbol;Acc:MGI:1915446]
ENSMUSG00000028391	Wdr31	432.019	157.297	1.42293	0.000240474	WD repeat domain 31 [Source:MGI Symbol;Acc:MGI:1918604]
ENSMUSG00000099296	Gm27251	99.4928	220.642	-1.42227	0.00262815	predicted gene 27251 [Source:MGI Symbol;Acc:MGI:5521094]
ENSMUSG00000035769	Xylb	55.4808	98.1695	-1.422	0.0104285	xylulokinase homolog (H. influenzae) [Source:MGI Symbol;Acc:MGI:2142985]
ENSMUSG00000029545	Acads	22.1979	50.1394	-1.42179	0.0497763	acyl-Coenzyme A dehydrogenase, short chain [Source:MGI Symbol;Acc:MGI:87868]
ENSMUSG00000037470	Uggt1	152.15	356.867	-1.41688	0.000636495	UDP-glucose glycoprotein glucosyltransferase 1 [Source:MGI Symbol;Acc:MGI:2443162]
ENSMUSG00000052102	Gnpda1	26.0616	58.7717	-1.41521	0.0295069	glucosamine-6-phosphate deaminase 1 [Source:MGI Symbol;Acc:MGI:1347054]
ENSMUSG00000037275	Gemin5	161.034	397.345	-1.41499	0.000987479	gem (nuclear organelle) associated protein 5 [Source:MGI Symbol;Acc:MGI:2449311]
ENSMUSG00000025027	Xpnpep1	105.508	117.355	-1.41442	0.011953	X-prolyl aminopeptidase (aminopeptidase P) 1, soluble [Source:MGI Symbol;Acc:MGI:2180003]
ENSMUSG00000038664	Herc1	33.6641	63.182	-1.41357	0.022609	hect (homologous to the E6-AP (UBE3A) carboxyl terminus) domain and RCC1 (CHC1)-like domain (RLD) 1 [Source:MGI Symbol;Acc:MGI:2384589]
ENSMUSG00000038056	Kmt2c	210.943	512.33	-1.41177	0.000509651	lysine (K)-specific methyltransferase 2C [Source:MGI Symbol;Acc:MGI:2444959]
ENSMUSG00000018379	Srsf1	131.319	271.08	-1.41131	0.00479566	serine/arginine-rich splicing factor 1 [Source:MGI Symbol;Acc:MGI:98283]
ENSMUSG00000031060	Rbm10	48.4406	82.2365	-1.41025	0.0105688	RNA binding motif protein 10 [Source:MGI Symbol;Acc:MGI:2384310]
ENSMUSG00000067365	Tmem128	79.2738	36.4482	1.40841	0.00871326	transmembrane protein 128 [Source:MGI Symbol;Acc:MGI:1913559]
ENSMUSG00000035133	Arhgap5	61.6629	143.854	-1.40838	0.0099914	Rho GTPase activating protein 5 [Source:MGI Symbol;Acc:MGI:1332637]
ENSMUSG00000040859	Bsdc1	36.0901	60.9388	-1.40805	0.021379	BSD domain containing 1 [Source:MGI Symbol;Acc:MGI:1913466]
ENSMUSG00000024187	Itfg3	298.083	559.016	-1.4067	0.000353919	integrin alpha FG-GAP repeat containing 3 [Source:MGI Symbol;Acc:MGI:2146854]
ENSMUSG00000052852	Reep1	452.567	742.416	-1.40567	0.00594017	receptor accessory protein 1 [Source:MGI Symbol;Acc:MGI:1098827]
ENSMUSG00000026622	Nek2	183.437	323.697	-1.40517	0.00347567	NIMA (never in mitosis gene a)-related expressed kinase 2 [Source:MGI Symbol;Acc:MGI:109359]
ENSMUSG00000016257	Slmo2	69.8217	31.6833	1.40464	0.0206598	slowmo homolog 2 (Drosophila) [Source:MGI Symbol;Acc:MGI:1913640]
ENSMUSG00000005447	Pafah1b3	142.061	64.0384	1.40373	0.00368655	platelet-activating factor acetylhydrolase, isoform 1b, subunit 3 [Source:MGI Symbol;Acc:MGI:108414]
ENSMUSG00000029066	Mrpl20	186.088	97.0545	1.40217	0.00076624	mitochondrial ribosomal protein L20 [Source:MGI Symbol;Acc:MGI:2137221]
ENSMUSG00000090247	Bloc1s1	47.3336	20.4911	1.40208	0.0365592	biogenesis of lysosomal organelles complex-1, subunit 1 [Source:MGI Symbol;Acc:MGI:1195276]
ENSMUSG00000018287	Spag7	294.905	127.249	1.40198	0.000636757	sperm associated antigen 7 [Source:MGI Symbol;Acc:MGI:107380]
ENSMUSG00000032478	Nme6	138.865	64.2067	1.40126	0.00293408	NME/NM23 nucleoside diphosphate kinase 6 [Source:MGI Symbol;Acc:MGI:1861676]
ENSMUSG00000020038	Cry1	68.1284	128.041	-1.39997	0.0127333	cryptochrome 1 (photolyase-like) [Source:MGI Symbol;Acc:MGI:1270841]
ENSMUSG00000014633	Cmc2	66.3531	29.227	1.39941	0.0157157	COX assembly mitochondrial protein 2 [Source:MGI Symbol;Acc:MGI:1913781]
ENSMUSG00000037536	Fbxo34	61.0295	106.397	-1.39869	0.00871326	F-box protein 34 [Source:MGI Symbol;Acc:MGI:1926188]
ENSMUSG00000016833	Mrps18c	174.114	76.0771	1.39804	0.0022678	mitochondrial ribosomal protein S18C [Source:MGI Symbol;Acc:MGI:1915985]
ENSMUSG00000061518	Cox5b	181.21	80.897	1.39762	0.00206771	cytochrome c oxidase subunit Vb [Source:MGI Symbol;Acc:MGI:88475]
ENSMUSG00000025907	Rb1cc1	424.83	826.06	-1.39692	0.00104348	RB1-inducible coiled-coil 1 [Source:MGI Symbol;Acc:MGI:1341850]
ENSMUSG00000062169	Cnih4	177.01	83.6737	1.39478	0.00228744	cornichon homolog 4 (Drosophila) [Source:MGI Symbol;Acc:MGI:1925828]
ENSMUSG00000031652	N4bp1	21.5172	60.5787	-1.39395	0.033272	NEDD4 binding protein 1 [Source:MGI Symbol;Acc:MGI:2136825]
ENSMUSG00000030611	Mrps11	98.1409	44.7397	1.39187	0.0123089	mitochondrial ribosomal protein S11 [Source:MGI Symbol;Acc:MGI:1915244]
ENSMUSG00000031278	Acsl4	186.013	318.852	-1.39133	0.00112537	acyl-CoA synthetase long-chain family member 4 [Source:MGI Symbol;Acc:MGI:1354713]
ENSMUSG00000038533	Cbfa2t2	25.0081	50.3485	-1.39	0.0407223	core-binding factor, runt domain, alpha subunit 2, translocated to, 2 (human) [Source:MGI Symbol;Acc:MGI:1333833]
ENSMUSG00000036315	Znrd1	162.206	81.5807	1.38784	0.00594017	zinc ribbon domain containing, 1 [Source:MGI Symbol;Acc:MGI:1913386]
ENSMUSG00000038722	Bud31	208.192	102.906	1.3873	0.000863818	BUD31 homolog (yeast) [Source:MGI Symbol;Acc:MGI:2141291]
ENSMUSG00000022517	Mgrn1	45.1192	80.8103	-1.3869	0.019523	mahogunin, ring finger 1 [Source:MGI Symbol;Acc:MGI:2447670]
ENSMUSG00000095677	Dynlt1f	157.877	65.8492	1.38689	0.00380386	dynein light chain Tctex-type 1F [Source:MGI Symbol;Acc:MGI:3780996]
ENSMUSG00000015247	Nipsnap3b	67.963	32.0009	1.38646	0.0272653	nipsnap homolog 3B (C. elegans) [Source:MGI Symbol;Acc:MGI:1913786]
ENSMUSG00000041837	Pdcd7	44.009	93.6396	-1.38617	0.0134418	programmed cell death 7 [Source:MGI Symbol;Acc:MGI:1859170]
ENSMUSG00000027466	Rbck1	51.5282	63.8812	-1.38524	0.0179453	RanBP-type and C3HC4-type zinc finger containing 1 [Source:MGI Symbol;Acc:MGI:1344372]
ENSMUSG00000091228	Gm20390	863.766	398.771	1.38341	0.000775989	predicted gene 20390 [Source:MGI Symbol;Acc:MGI:5141855]
ENSMUSG00000019738	Polr2i	95.3468	42.8001	1.38306	0.00642941	polymerase (RNA) II (DNA directed) polypeptide I [Source:MGI Symbol;Acc:MGI:1917170]
ENSMUSG00000027651	Rprd1b	44.6444	77.7297	-1.38245	0.0226264	regulation of nuclear pre-mRNA domain containing 1B [Source:MGI Symbol;Acc:MGI:1917720]
ENSMUSG00000078619	Smarcd2	155.168	238.635	-1.38174	0.00577637	SWI/SNF related, matrix associated, actin dependent regulator of chromatin, subfamily d, member 2 [Source:MGI Symbol;Acc:MGI:1933621]
ENSMUSG00000083125	Gm16203	29.953	75.4124	-1.38098	0.0273037	predicted gene 16203 [Source:MGI Symbol;Acc:MGI:3801873]
ENSMUSG00000010376	Nedd8	266.599	122.577	1.38079	0.000929176	neural precursor cell expressed, developmentally down-regulated gene 8 [Source:MGI Symbol;Acc:MGI:97301]
ENSMUSG00000030714	Ccdc101	138.613	56.4305	1.38072	0.00477044	coiled-coil domain containing 101 [Source:MGI Symbol;Acc:MGI:1922815]
ENSMUSG00000042462	Dctpp1	90.9746	42.5586	1.37805	0.0134418	dCTP pyrophosphatase 1 [Source:MGI Symbol;Acc:MGI:1913672]
ENSMUSG00000028438	Kif24	183.746	71.9446	1.378	0.00393382	kinesin family member 24 [Source:MGI Symbol;Acc:MGI:1918345]
ENSMUSG00000022890	Atp5j	552.572	255.065	1.37759	0.000189868	ATP synthase, H+ transporting, mitochondrial F0 complex, subunit F [Source:MGI Symbol;Acc:MGI:107777]
ENSMUSG00000042688	Mapk6	203.69	413.515	-1.37714	0.000713748	mitogen-activated protein kinase 6 [Source:MGI Symbol;Acc:MGI:1354946]
ENSMUSG00000073705	Apitd1	53.0498	26.1344	1.37704	0.0275718	apoptosis-inducing, TAF9-like domain 1 [Source:MGI Symbol;Acc:MGI:1917178]
ENSMUSG00000020661	Dnmt3a	68.9505	133.449	-1.37689	0.0112309	DNA methyltransferase 3A [Source:MGI Symbol;Acc:MGI:1261827]
ENSMUSG00000042102	Dmgdh	57.0932	141.557	-1.37563	0.00580817	dimethylglycine dehydrogenase precursor [Source:MGI Symbol;Acc:MGI:1921379]
ENSMUSG00000041126	H2afv	290.784	146.116	1.37556	0.00045925	H2A histone family, member V [Source:MGI Symbol;Acc:MGI:1924855]
ENSMUSG00000002718	Cse1l	117.432	215.26	-1.37516	0.00322888	chromosome segregation 1-like (S. cerevisiae) [Source:MGI Symbol;Acc:MGI:1339951]
ENSMUSG00000018239	Zcchc10	76.082	36.7673	1.37512	0.0127561	zinc finger, CCHC domain containing 10 [Source:MGI Symbol;Acc:MGI:1196228]
ENSMUSG00000058230	Arhgap35	36.764	69.4093	-1.37487	0.0268925	Rho GTPase activating protein 35 [Source:MGI Symbol;Acc:MGI:1929494]
ENSMUSG00000031960	Aars	146.351	285.832	-1.37444	0.00116123	alanyl-tRNA synthetase [Source:MGI Symbol;Acc:MGI:2384560]
ENSMUSG00000025158	Rfng	80.0079	146.903	-1.3742	0.00541876	RFNG O-fucosylpeptide 3-beta-N-acetylglucosaminyltransferase [Source:MGI Symbol;Acc:MGI:894275]
ENSMUSG00000037519	Ppfia1	130.164	250.603	-1.37419	0.00204241	protein tyrosine phosphatase, receptor type, f polypeptide (PTPRF), interacting protein (liprin), alpha 1 [Source:MGI Symbol;Acc:MGI:1924750]
ENSMUSG00000003316	Glg1	38.4258	82.4514	-1.37363	0.023573	golgi apparatus protein 1 [Source:MGI Symbol;Acc:MGI:104967]
ENSMUSG00000001289	Pfdn5	137.855	67.5322	1.37299	0.00384744	prefoldin 5 [Source:MGI Symbol;Acc:MGI:1928753]
ENSMUSG00000003226	Ranbp2	56.3869	148.073	-1.37291	0.0311045	RAN binding protein 2 [Source:MGI Symbol;Acc:MGI:894323]
ENSMUSG00000024346	Pfdn1	93.7266	41.8223	1.37226	0.00784901	prefoldin 1 [Source:MGI Symbol;Acc:MGI:1914449]
ENSMUSG00000048874	Phf3	72.6882	182.576	-1.37217	0.00407407	PHD finger protein 3 [Source:MGI Symbol;Acc:MGI:2446126]
ENSMUSG00000047146	Tet1	55.8995	129.701	-1.36928	0.0169978	tet methylcytosine dioxygenase 1 [Source:MGI Symbol;Acc:MGI:1098693]
ENSMUSG00000017843	Ppp2r5c	31.9712	57.0711	-1.36894	0.0306337	protein phosphatase 2, regulatory subunit B', gamma [Source:MGI Symbol;Acc:MGI:1349475]
ENSMUSG00000038299	Wdr36	83.8356	143.041	-1.36885	0.00642941	WD repeat domain 36 [Source:MGI Symbol;Acc:MGI:1917819]
ENSMUSG00000049950	Rpp38	49.8636	25.1567	1.36735	0.0409381	ribonuclease P/MRP 38 subunit [Source:MGI Symbol;Acc:MGI:2443607]
ENSMUSG00000053317	Sec61b	75.059	34.1296	1.3673	0.0164172	Sec61 beta subunit [Source:MGI Symbol;Acc:MGI:1913462]
ENSMUSG00000024151	Msh2	112.381	231.853	-1.36635	0.00842943	mutS homolog 2 (E. coli) [Source:MGI Symbol;Acc:MGI:101816]
ENSMUSG00000022370	Mrpl13	102.558	46.3523	1.36549	0.0109286	mitochondrial ribosomal protein L13 [Source:MGI Symbol;Acc:MGI:2137218]
ENSMUSG00000022682	Rrn3	128.138	213.957	-1.36544	0.00333875	RRN3 RNA polymerase I transcription factor homolog (yeast) [Source:MGI Symbol;Acc:MGI:1925255]
ENSMUSG00000041697	Cox6a1	449.648	206.862	1.36543	0.000944416	cytochrome c oxidase subunit VIa polypeptide 1 [Source:MGI Symbol;Acc:MGI:103099]
ENSMUSG00000030655	Smg1	50.8167	142.213	-1.36533	0.0173018	SMG1 homolog, phosphatidylinositol 3-kinase-related kinase (C. elegans) [Source:MGI Symbol;Acc:MGI:1919742]
ENSMUSG00000021840	Mapk1ip1l	56.6197	124.163	-1.36519	0.0076328	mitogen-activated protein kinase 1 interacting protein 1-like [Source:MGI Symbol;Acc:MGI:2444022]
ENSMUSG00000029580	Actb	1790.86	809.624	1.36466	0.00114694	actin, beta [Source:MGI Symbol;Acc:MGI:87904]
ENSMUSG00000025139	Tollip	83.6591	164.313	-1.36427	0.00473167	toll interacting protein [Source:MGI Symbol;Acc:MGI:1891808]
ENSMUSG00000039509	Nup133	94.0382	152.734	-1.36254	0.0125732	nucleoporin 133 [Source:MGI Symbol;Acc:MGI:2442620]
ENSMUSG00000027107	Chrna1	75.6225	36.7371	1.36242	0.013225	cholinergic receptor, nicotinic, alpha polypeptide 1 (muscle) [Source:MGI Symbol;Acc:MGI:87885]
ENSMUSG00000026455	Klhl12	53.3907	78.7317	-1.36146	0.0180404	kelch-like 12 [Source:MGI Symbol;Acc:MGI:2385619]
ENSMUSG00000060477	Irak2	60.9742	113.344	-1.36133	0.0137121	interleukin-1 receptor-associated kinase 2 [Source:MGI Symbol;Acc:MGI:2429603]
ENSMUSG00000029313	Aff1	42.016	86.5004	-1.36123	0.0388235	AF4/FMR2 family, member 1 [Source:MGI Symbol;Acc:MGI:1100819]
ENSMUSG00000029144	Gtf3c2	120.531	203.101	-1.36035	0.00193823	general transcription factor IIIC, polypeptide 2, beta [Source:MGI Symbol;Acc:MGI:1919002]
ENSMUSG00000027679	Dnajc19	96.9045	40.139	1.35965	0.0109552	DnaJ (Hsp40) homolog, subfamily C, member 19 [Source:MGI Symbol;Acc:MGI:1914963]
ENSMUSG00000040703	Cyp2s1	247.487	373.457	-1.35927	0.00259642	cytochrome P450, family 2, subfamily s, polypeptide 1 [Source:MGI Symbol;Acc:MGI:1921384]
ENSMUSG00000022718	Dgcr8	32.3462	67.1865	-1.35896	0.0324855	DiGeorge syndrome critical region gene 8 [Source:MGI Symbol;Acc:MGI:2151114]
ENSMUSG00000020801	Med31	123.084	55.9018	1.35786	0.00780519	mediator complex subunit 31 [Source:MGI Symbol;Acc:MGI:1914529]
ENSMUSG00000044026	Slc35g1	136.33	246.426	-1.35594	0.00239823	solute carrier family 35, member G1 [Source:MGI Symbol;Acc:MGI:2444789]
ENSMUSG00000026289	Atg16l1	45.0179	72.4248	-1.35569	0.0393131	autophagy related 16-like 1 (S. cerevisiae) [Source:MGI Symbol;Acc:MGI:1924290]
ENSMUSG00000040761	Spen	37.9973	85.4621	-1.35522	0.0161766	SPEN homolog, transcriptional regulator (Drosophila) [Source:MGI Symbol;Acc:MGI:1891706]
ENSMUSG00000084848	4933408N05Rik	116.568	55.7821	1.35511	0.0139309	RIKEN cDNA 4933408N05 gene [Source:MGI Symbol;Acc:MGI:1918372]
ENSMUSG00000075229	Ccdc58	122.903	59.3083	1.35465	0.00513554	coiled-coil domain containing 58 [Source:MGI Symbol;Acc:MGI:2146423]
ENSMUSG00000028861	Mrps15	83.9283	37.0055	1.3539	0.0146942	mitochondrial ribosomal protein S15 [Source:MGI Symbol;Acc:MGI:1913657]
ENSMUSG00000036990	Otud4	36.1677	105.437	-1.35309	0.0216468	OTU domain containing 4 [Source:MGI Symbol;Acc:MGI:1098801]
ENSMUSG00000027076	Timm10	185.909	90.4291	1.35287	0.00286431	translocase of inner mitochondrial membrane 10 [Source:MGI Symbol;Acc:MGI:1353429]
ENSMUSG00000025204	Ndufb8	258.419	112.155	1.35189	0.00115597	NADH dehydrogenase (ubiquinone) 1 beta subcomplex 8 [Source:MGI Symbol;Acc:MGI:1914514]
ENSMUSG00000049521	Cdc42ep1	40.9632	96.5368	-1.3501	0.0231792	CDC42 effector protein (Rho GTPase binding) 1 [Source:MGI Symbol;Acc:MGI:1929763]
ENSMUSG00000050628	Ubald2	27.8062	50.5513	-1.34981	0.0494656	UBA-like domain containing 2 [Source:MGI Symbol;Acc:MGI:1914635]
ENSMUSG00000034108	Ccs	61.8063	30.5078	1.34953	0.0263737	copper chaperone for superoxide dismutase [Source:MGI Symbol;Acc:MGI:1333783]
ENSMUSG00000034880	Mrpl34	68.0307	33.6961	1.34896	0.0295069	mitochondrial ribosomal protein L34 [Source:MGI Symbol;Acc:MGI:2137227]
ENSMUSG00000027247	Arhgap1	232.717	389.827	-1.34831	0.00145014	Rho GTPase activating protein 1 [Source:MGI Symbol;Acc:MGI:2445003]
ENSMUSG00000042426	Dhx29	27.7085	65.5482	-1.34741	0.0416869	DEAH (Asp-Glu-Ala-His) box polypeptide 29 [Source:MGI Symbol;Acc:MGI:2145374]
ENSMUSG00000063052	Lrrc40	33.6783	61.5445	-1.34674	0.0373221	leucine rich repeat containing 40 [Source:MGI Symbol;Acc:MGI:1914394]
ENSMUSG00000071654	AI462493	99.6954	50.6437	1.34652	0.00894284	expressed sequence AI462493 [Source:MGI Symbol;Acc:MGI:2147553]
ENSMUSG00000051378	Kif18b	92.2881	173.2	-1.34573	0.00683584	kinesin family member 18B [Source:MGI Symbol;Acc:MGI:2446979]
ENSMUSG00000040738	Ints8	39.8713	94.419	-1.34531	0.0303523	integrator complex subunit 8 [Source:MGI Symbol;Acc:MGI:1919906]
ENSMUSG00000019951	Uhrf1bp1l	31.7539	63.4798	-1.34395	0.0296646	UHRF1 (ICBP90) binding protein 1-like [Source:MGI Symbol;Acc:MGI:2442888]
ENSMUSG00000026966	Ssna1	179.17	92.6602	1.34309	0.0027595	Sjogren's syndrome nuclear autoantigen 1 [Source:MGI Symbol;Acc:MGI:1915725]
ENSMUSG00000061650	Med9	66.5163	30.6204	1.34252	0.0198874	mediator complex subunit 9 [Source:MGI Symbol;Acc:MGI:2183151]
ENSMUSG00000049957	Ccdc137	59.3154	96.5796	-1.34248	0.0239032	coiled-coil domain containing 137 [Source:MGI Symbol;Acc:MGI:1914541]
ENSMUSG00000033184	Tmed7	65.1165	68.2127	-1.34187	0.0197807	transmembrane emp24 protein transport domain containing 7 [Source:MGI Symbol;Acc:MGI:1913926]
ENSMUSG00000027472	Pdrg1	157.998	79.5424	1.34111	0.0110301	p53 and DNA damage regulated 1 [Source:MGI Symbol;Acc:MGI:1915809]
ENSMUSG00000040771	Oard1	61.9054	32.5417	1.34078	0.0421704	O-acyl-ADP-ribose deacylase 1 [Source:MGI Symbol;Acc:MGI:2146818]
ENSMUSG00000063200	Nol7	186.763	87.8727	1.34065	0.0021021	nucleolar protein 7 [Source:MGI Symbol;Acc:MGI:1917328]
ENSMUSG00000029501	Ankle2	56.1832	113.704	-1.33876	0.00946314	ankyrin repeat and LEM domain containing 2 [Source:MGI Symbol;Acc:MGI:1261856]
ENSMUSG00000022286	Grhl2	48.9562	113.348	-1.33857	0.011243	grainyhead-like 2 (Drosophila) [Source:MGI Symbol;Acc:MGI:2182543]
ENSMUSG00000056999	Ide	51.8399	87.8356	-1.3383	0.018892	insulin degrading enzyme [Source:MGI Symbol;Acc:MGI:96412]
ENSMUSG00000055839	Tceb2	233.96	112.306	1.33823	0.00159991	transcription elongation factor B (SIII), polypeptide 2 [Source:MGI Symbol;Acc:MGI:1914923]
ENSMUSG00000028423	Nfx1	90.5212	161.831	-1.33806	0.00580817	nuclear transcription factor, X-box binding 1 [Source:MGI Symbol;Acc:MGI:1921414]
ENSMUSG00000025144	Stra13	104.247	48.3141	1.33704	0.00958818	stimulated by retinoic acid 13 [Source:MGI Symbol;Acc:MGI:894324]
ENSMUSG00000042628	Zfyve1	44.1387	102.452	-1.33691	0.0269386	zinc finger, FYVE domain containing 1 [Source:MGI Symbol;Acc:MGI:3026685]
ENSMUSG00000020526	Znhit3	487.09	240.549	1.33638	0.000437105	zinc finger, HIT type 3 [Source:MGI Symbol;Acc:MGI:3051596]
ENSMUSG00000058603	Rpl28-ps1	59.5235	29.949	1.33515	0.0352433	ribosomal protein L28, pseudogene 1 [Source:MGI Symbol;Acc:MGI:3705349]
ENSMUSG00000028648	Ndufs5	257.142	121.929	1.33485	0.000775989	NADH dehydrogenase (ubiquinone) Fe-S protein 5 [Source:MGI Symbol;Acc:MGI:1890889]
ENSMUSG00000026383	Epb4.1l5	68.1006	104.481	-1.33467	0.0195166	erythrocyte protein band 4.1-like 5 [Source:MGI Symbol;Acc:MGI:103006]
ENSMUSG00000101655		90.9385	46.3222	1.33463	0.0210359
ENSMUSG00000057130	Txnl4a	277.329	140.892	1.3342	0.00101115	thioredoxin-like 4A [Source:MGI Symbol;Acc:MGI:1351613]
ENSMUSG00000069117	Gm10260	345.647	169.347	1.3342	0.00146807	predicted gene 10260 [Source:MGI Symbol;Acc:MGI:3642298]
ENSMUSG00000029635	Cdk8	32.5241	71.0185	-1.33381	0.0266701	cyclin-dependent kinase 8 [Source:MGI Symbol;Acc:MGI:1196224]
ENSMUSG00000078521	Aunip	46.507	24.2675	1.33373	0.0419496	aurora kinase A and ninein interacting protein [Source:MGI Symbol;Acc:MGI:1917135]
ENSMUSG00000028530	Jak1	31.9797	55.2407	-1.33324	0.0441705	Janus kinase 1 [Source:MGI Symbol;Acc:MGI:96628]
ENSMUSG00000031826	Usp10	403.127	707.038	-1.33213	0.00279727	ubiquitin specific peptidase 10 [Source:MGI Symbol;Acc:MGI:894652]
ENSMUSG00000060601	Nr1h2	96.3562	124.885	-1.33177	0.00668756	nuclear receptor subfamily 1, group H, member 2 [Source:MGI Symbol;Acc:MGI:1352463]
ENSMUSG00000013787	Ehmt2	47.6672	90.4959	-1.33075	0.0272707	euchromatic histone lysine N-methyltransferase 2 [Source:MGI Symbol;Acc:MGI:2148922]
ENSMUSG00000022400	Rbx1	344.493	161.989	1.33019	0.000523612	ring-box 1 [Source:MGI Symbol;Acc:MGI:1891829]
ENSMUSG00000031154	Otud5	150.582	216.728	-1.33008	0.0092358	OTU domain containing 5 [Source:MGI Symbol;Acc:MGI:1859615]
ENSMUSG00000030538	Cib1	74.2771	38.1446	1.32957	0.0292711	calcium and integrin binding 1 (calmyrin) [Source:MGI Symbol;Acc:MGI:1344418]
ENSMUSG00000026965	Anapc2	60.3069	105.337	-1.32936	0.0187614	anaphase promoting complex subunit 2 [Source:MGI Symbol;Acc:MGI:2139135]
ENSMUSG00000026663	Atf6	47.9436	70.8701	-1.32734	0.0223362	activating transcription factor 6 [Source:MGI Symbol;Acc:MGI:1926157]
ENSMUSG00000032171	Pin1	138.521	66.993	1.32556	0.00474617	protein (peptidyl-prolyl cis/trans isomerase) NIMA-interacting 1 [Source:MGI Symbol;Acc:MGI:1346036]
ENSMUSG00000020225	Tmbim4	139.344	68.5607	1.32411	0.00643125	transmembrane BAX inhibitor motif containing 4 [Source:MGI Symbol;Acc:MGI:1915462]
ENSMUSG00000023861	Mpc1	489.41	227.702	1.32351	0.000332099	mitochondrial pyruvate carrier 1 [Source:MGI Symbol;Acc:MGI:1915240]
ENSMUSG00000029404	Arl6ip4	50.558	24.9236	1.32349	0.044962	ADP-ribosylation factor-like 6 interacting protein 4 [Source:MGI Symbol;Acc:MGI:1929500]
ENSMUSG00000066036	Ubr4	50.7392	113.211	-1.32278	0.0392927	ubiquitin protein ligase E3 component n-recognin 4 [Source:MGI Symbol;Acc:MGI:1916366]
ENSMUSG00000063694	Cycs	68.8882	33.0985	1.32012	0.0207116	cytochrome c, somatic [Source:MGI Symbol;Acc:MGI:88578]
ENSMUSG00000049422	Chchd10	241.465	110.62	1.3201	0.00333732	coiled-coil-helix-coiled-coil-helix domain containing 10 [Source:MGI Symbol;Acc:MGI:2143558]
ENSMUSG00000001151	Pcnt	49.3559	136.234	-1.31971	0.0142341	pericentrin (kendrin) [Source:MGI Symbol;Acc:MGI:102722]
ENSMUSG00000024922	Ovol1	39.8393	63.211	-1.31966	0.0352433	OVO homolog-like 1 (Drosophila) [Source:MGI Symbol;Acc:MGI:1330290]
ENSMUSG00000027067	Ssrp1	147.783	250.669	-1.31965	0.00188187	structure specific recognition protein 1 [Source:MGI Symbol;Acc:MGI:107912]
ENSMUSG00000025809	Itgb1	61.0638	140.633	-1.3196	0.0123459	integrin beta 1 (fibronectin receptor beta) [Source:MGI Symbol;Acc:MGI:96610]
ENSMUSG00000061286	Exosc5	112.724	58.3776	1.31881	0.013234	exosome component 5 [Source:MGI Symbol;Acc:MGI:107889]
ENSMUSG00000001036	Epn2	110.606	220.954	-1.31879	0.00479566	epsin 2 [Source:MGI Symbol;Acc:MGI:1333766]
ENSMUSG00000018286	Psmb6	694.352	325.326	1.31869	0.000647092	proteasome (prosome, macropain) subunit, beta type 6 [Source:MGI Symbol;Acc:MGI:104880]
ENSMUSG00000096942	Rps19-ps6	253.168	123.255	1.31748	0.013491	ribosomal protein S19, pseudogene 6 [Source:MGI Symbol;Acc:MGI:5011818]
ENSMUSG00000067608	Pcna-ps2	52.7562	24.7386	1.31613	0.0454541	proliferating cell nuclear antigen pseudogene 2 [Source:MGI Symbol;Acc:MGI:97505]
ENSMUSG00000074221	Zfp568	201.399	394.287	-1.31584	0.00162881	zinc finger protein 568 [Source:MGI Symbol;Acc:MGI:2142347]
ENSMUSG00000032459	Mrps22	122.893	57.4013	1.31486	0.00628327	mitochondrial ribosomal protein S22 [Source:MGI Symbol;Acc:MGI:1928137]
ENSMUSG00000043535	Setx	70.5427	169.576	-1.3146	0.0167905	senataxin [Source:MGI Symbol;Acc:MGI:2443480]
ENSMUSG00000016831	Tox4	131.183	228.867	-1.31455	0.00478763	TOX high mobility group box family member 4 [Source:MGI Symbol;Acc:MGI:1915389]
ENSMUSG00000049124	Gm8186	112.832	55.3342	1.31436	0.00986877	predicted gene 8186 [Source:MGI Symbol;Acc:MGI:3643110]
ENSMUSG00000002981	Clptm1	155.103	280.228	-1.314	0.00780519	cleft lip and palate associated transmembrane protein 1 [Source:MGI Symbol;Acc:MGI:1927155]
ENSMUSG00000038535	Zfp280d	55.4586	95.9687	-1.3129	0.0185272	zinc finger protein 280D [Source:MGI Symbol;Acc:MGI:2384583]
ENSMUSG00000043770	Gm12481	182.008	92.5036	1.31253	0.00645349	predicted gene 12481 [Source:MGI Symbol;Acc:MGI:3650743]
ENSMUSG00000005615	Pcyt1a	60.9628	100.31	-1.31233	0.0137927	phosphate cytidylyltransferase 1, choline, alpha isoform [Source:MGI Symbol;Acc:MGI:88557]
ENSMUSG00000006215	Zbtb17	97.6112	215.92	-1.31192	0.00279767	zinc finger and BTB domain containing 17 [Source:MGI Symbol;Acc:MGI:107410]
ENSMUSG00000046410	Kcnk6	200.796	215.403	-1.31079	0.00254819	potassium inwardly-rectifying channel, subfamily K, member 6 [Source:MGI Symbol;Acc:MGI:1891291]
ENSMUSG00000081094	Rpl19-ps11	47.9309	24.1313	1.31053	0.0442869	ribosomal protein L19, pseudogene 11 [Source:MGI Symbol;Acc:MGI:3642193]
ENSMUSG00000032504	Pdcd6ip	44.0893	72.361	-1.30914	0.0328045	programmed cell death 6 interacting protein [Source:MGI Symbol;Acc:MGI:1333753]
ENSMUSG00000027454	Gins1	99.6077	47.7734	1.3082	0.00883604	GINS complex subunit 1 (Psf1 homolog) [Source:MGI Symbol;Acc:MGI:1916520]
ENSMUSG00000037343	Taf2	51.4908	83.2457	-1.30807	0.0191465	TAF2 RNA polymerase II, TATA box binding protein (TBP)-associated factor [Source:MGI Symbol;Acc:MGI:2443028]
ENSMUSG00000044573	Acp1	154.101	73.2387	1.30737	0.00398724	acid phosphatase 1, soluble [Source:MGI Symbol;Acc:MGI:87881]
ENSMUSG00000003500	Impdh1	312.303	496.707	-1.307	0.00137383	inosine 5'-phosphate dehydrogenase 1 [Source:MGI Symbol;Acc:MGI:96567]
ENSMUSG00000033285	Wdr3	133.237	269.956	-1.30686	0.00479566	WD repeat domain 3 [Source:MGI Symbol;Acc:MGI:2443143]
ENSMUSG00000065990	Aurkaip1	76.259	36.596	1.30529	0.0277799	aurora kinase A interacting protein 1 [Source:MGI Symbol;Acc:MGI:1913327]
ENSMUSG00000014856	Tmem208	146.672	70.6596	1.30492	0.00600666	transmembrane protein 208 [Source:MGI Symbol;Acc:MGI:1913570]
ENSMUSG00000037601	Nme1	624.485	297.021	1.30425	0.000719546	NME/NM23 nucleoside diphosphate kinase 1 [Source:MGI Symbol;Acc:MGI:97355]
ENSMUSG00000056671	Prelid2	153.736	83.6544	1.30393	0.0277986	PRELI domain containing 2 [Source:MGI Symbol;Acc:MGI:1924869]
ENSMUSG00000025732	Fam195a	213.867	100.817	1.30348	0.0021021	family with sequence similarity 195, member A [Source:MGI Symbol;Acc:MGI:1915491]
ENSMUSG00000054196	Cthrc1	75.0172	42.2952	1.30326	0.0185156	collagen triple helix repeat containing 1 [Source:MGI Symbol;Acc:MGI:1915838]
ENSMUSG00000001415	Smg5	33.0039	71.2478	-1.301	0.0303181	Smg-5 homolog, nonsense mediated mRNA decay factor (C. elegans) [Source:MGI Symbol;Acc:MGI:2447364]
ENSMUSG00000078713	Tomm5	493.252	242.364	1.30014	0.000894399	translocase of outer mitochondrial membrane 5 homolog (yeast) [Source:MGI Symbol;Acc:MGI:1915762]
ENSMUSG00000046133	C130073F10Rik	228.355	112.454	1.29867	0.00925793	RIKEN cDNA C130073F10 gene [Source:MGI Symbol;Acc:MGI:3045359]
ENSMUSG00000039456	Morc3	51.3966	124.184	-1.29818	0.0117092	microrchidia 3 [Source:MGI Symbol;Acc:MGI:2136841]
ENSMUSG00000040943	Tet2	62.5063	165.408	-1.29637	0.0121471	tet methylcytosine dioxygenase 2 [Source:MGI Symbol;Acc:MGI:2443298]
ENSMUSG00000057375	Yipf1	74.0699	39.5479	1.29331	0.0266205	Yip1 domain family, member 1 [Source:MGI Symbol;Acc:MGI:1915532]
ENSMUSG00000025815	Dhtkd1	48.0324	120.38	-1.29306	0.0192591	dehydrogenase E1 and transketolase domain containing 1 [Source:MGI Symbol;Acc:MGI:2445096]
ENSMUSG00000033099	Nol12	148.943	73.766	1.29272	0.00532662	nucleolar protein 12 [Source:MGI Symbol;Acc:MGI:2146285]
ENSMUSG00000097308	Gm6410	151.79	70.5795	1.29212	0.00532664	predicted gene 6410 [Source:MGI Symbol;Acc:MGI:3643419]
ENSMUSG00000024073	Birc6	59.0061	140.057	-1.29207	0.0169545	baculoviral IAP repeat-containing 6 [Source:MGI Symbol;Acc:MGI:1276108]
ENSMUSG00000019303	Psmc3ip	83.4823	42.8828	1.29046	0.0114721	proteasome (prosome, macropain) 26S subunit, ATPase 3, interacting protein [Source:MGI Symbol;Acc:MGI:1098610]
ENSMUSG00000028559	Osbpl9	67.3923	135.433	-1.29024	0.0200915	oxysterol binding protein-like 9 [Source:MGI Symbol;Acc:MGI:1923784]
ENSMUSG00000093674	Rpl41	3294.64	1588.95	1.2896	0.00555346	ribosomal protein L41 [Source:MGI Symbol;Acc:MGI:1915195]
ENSMUSG00000032481	Smarcc1	120.136	210.403	-1.28956	0.0053801	SWI/SNF related, matrix associated, actin dependent regulator of chromatin, subfamily c, member 1 [Source:MGI Symbol;Acc:MGI:1203524]
ENSMUSG00000000168	Dlat	35.9132	74.1875	-1.28901	0.0369694	dihydrolipoamide S-acetyltransferase (E2 component of pyruvate dehydrogenase complex) [Source:MGI Symbol;Acc:MGI:2385311]
ENSMUSG00000024646	Cyb5a	108.928	53.6147	1.28842	0.0266691	cytochrome b5 type A (microsomal) [Source:MGI Symbol;Acc:MGI:1926952]
ENSMUSG00000039585	Myo9a	55.2581	156.529	-1.28752	0.00958818	myosin IXa [Source:MGI Symbol;Acc:MGI:107735]
ENSMUSG00000022842	Ece2	48.1626	23.0028	1.28628	0.0496934	endothelin converting enzyme 2 [Source:MGI Symbol;Acc:MGI:1101356]
ENSMUSG00000023150	Ivns1abp	550.065	917.434	-1.28527	0.00615713	influenza virus NS1A binding protein [Source:MGI Symbol;Acc:MGI:2152389]
ENSMUSG00000031683	Lsm6	101.407	53.6846	1.28434	0.0124684	LSM6 homolog, U6 small nuclear RNA associated (S. cerevisiae) [Source:MGI Symbol;Acc:MGI:1925901]
ENSMUSG00000031488	Rab11fip1	57.4546	105.912	-1.28398	0.0332222	RAB11 family interacting protein 1 (class I) [Source:MGI Symbol;Acc:MGI:1923017]
ENSMUSG00000025979	Mob4	174.288	90.9823	1.28342	0.00478228	MOB family member 4, phocein [Source:MGI Symbol;Acc:MGI:104899]
ENSMUSG00000031657	Heatr3	142.601	286.565	-1.28278	0.00438235	HEAT repeat containing 3 [Source:MGI Symbol;Acc:MGI:2444491]
ENSMUSG00000061330	Gm11361	110.38	57.243	1.28237	0.0166537	predicted pseudogene 11361 [Source:MGI Symbol;Acc:MGI:3649931]
ENSMUSG00000022346	Myc	56.2026	94.8279	-1.28227	0.0429848	myelocytomatosis oncogene [Source:MGI Symbol;Acc:MGI:97250]
ENSMUSG00000019795	Pcmt1	279.706	136.851	1.2816	0.00190604	protein-L-isoaspartate (D-aspartate) O-methyltransferase 1 [Source:MGI Symbol;Acc:MGI:97502]
ENSMUSG00000033352	Map2k4	50.6581	88.4779	-1.28076	0.0199361	mitogen-activated protein kinase kinase 4 [Source:MGI Symbol;Acc:MGI:1346869]
ENSMUSG00000037857	Nufip2	211.965	400.726	-1.2798	0.00191257	nuclear fragile X mental retardation protein interacting protein 2 [Source:MGI Symbol;Acc:MGI:1915814]
ENSMUSG00000027752	Exosc8	198.444	100.799	1.27916	0.00238536	exosome component 8 [Source:MGI Symbol;Acc:MGI:1916889]
ENSMUSG00000071014	Ndufb6	168.535	86.0911	1.27892	0.00911544	NADH dehydrogenase (ubiquinone) 1 beta subcomplex, 6 [Source:MGI Symbol;Acc:MGI:2684983]
ENSMUSG00000034889	Cactin	44.7912	76.7747	-1.27746	0.0244444	cactin, spliceosome C complex subunit [Source:MGI Symbol;Acc:MGI:1917562]
ENSMUSG00000034617	Mtrr	60.6584	99.6323	-1.27648	0.0163372	5-methyltetrahydrofolate-homocysteine methyltransferase reductase [Source:MGI Symbol;Acc:MGI:1891037]
ENSMUSG00000078193	Gm2000	534.831	272.79	1.27595	0.00187197	predicted gene 2000 [Source:MGI Symbol;Acc:MGI:3780170]
ENSMUSG00000071662	Polr2g	67.4299	34.1305	1.27571	0.039167	polymerase (RNA) II (DNA directed) polypeptide G [Source:MGI Symbol;Acc:MGI:1914960]
ENSMUSG00000028622	Mrpl37	160.174	76.2584	1.27485	0.00959315	mitochondrial ribosomal protein L37 [Source:MGI Symbol;Acc:MGI:1926268]
ENSMUSG00000020705	Ddx42	56.8468	102.33	-1.27474	0.0195115	DEAD (Asp-Glu-Ala-Asp) box polypeptide 42 [Source:MGI Symbol;Acc:MGI:1919297]
ENSMUSG00000027465	Tbc1d20	41.1641	70.4288	-1.27417	0.0346036	TBC1 domain family, member 20 [Source:MGI Symbol;Acc:MGI:1914481]
ENSMUSG00000027342	Pcna	85.3209	41.9225	1.27359	0.0168271	proliferating cell nuclear antigen [Source:MGI Symbol;Acc:MGI:97503]
ENSMUSG00000038628	Polr3k	124.308	69.1059	1.27338	0.0093591	polymerase (RNA) III (DNA directed) polypeptide K [Source:MGI Symbol;Acc:MGI:1914255]
ENSMUSG00000042682	Selk	134.751	66.2691	1.27315	0.0114653	selenoprotein K [Source:MGI Symbol;Acc:MGI:1931466]
ENSMUSG00000025178	Pi4k2a	43.3889	78.2565	-1.27299	0.0443259	phosphatidylinositol 4-kinase type 2 alpha [Source:MGI Symbol;Acc:MGI:1934031]
ENSMUSG00000013646	Sh3bp5l	34.367	56.5492	-1.27286	0.0442888	SH3 binding domain protein 5 like [Source:MGI Symbol;Acc:MGI:1933124]
ENSMUSG00000030769	Slc5a11	34.9362	61.969	-1.27192	0.0441067	solute carrier family 5 (sodium/glucose cotransporter), member 11 [Source:MGI Symbol;Acc:MGI:1919316]
ENSMUSG00000073563	Csnk1g3	72.5695	133.248	-1.27135	0.0125858	casein kinase 1, gamma 3 [Source:MGI Symbol;Acc:MGI:1917675]
ENSMUSG00000051391	Ywhag	74.9034	158.993	-1.27104	0.00894284	tyrosine 3-monooxygenase/tryptophan 5-monooxygenase activation protein, gamma polypeptide [Source:MGI Symbol;Acc:MGI:108109]
ENSMUSG00000024493	Lars	69.0624	142.723	-1.27072	0.0160343	leucyl-tRNA synthetase [Source:MGI Symbol;Acc:MGI:1913808]
ENSMUSG00000023927	Satb1	114.828	217.76	-1.27017	0.00991675	special AT-rich sequence binding protein 1 [Source:MGI Symbol;Acc:MGI:105084]
ENSMUSG00000033918	Parl	105.201	49.8916	1.26916	0.0143356	presenilin associated, rhomboid-like [Source:MGI Symbol;Acc:MGI:1277152]
ENSMUSG00000035150	Eif2s3x	204.639	386.32	-1.26811	0.00229459	eukaryotic translation initiation factor 2, subunit 3, structural gene X-linked [Source:MGI Symbol;Acc:MGI:1349431]
ENSMUSG00000000171	Sdhd	88.8197	42.4821	1.26689	0.0190518	succinate dehydrogenase complex, subunit D, integral membrane protein [Source:MGI Symbol;Acc:MGI:1914175]
ENSMUSG00000064208	Gm10145	89.4377	46.2916	1.26687	0.0134198	predicted gene 10145 [Source:MGI Symbol;Acc:MGI:3704353]
ENSMUSG00000029599	Ddx54	121.059	188.554	-1.26684	0.00515591	DEAD (Asp-Glu-Ala-Asp) box polypeptide 54 [Source:MGI Symbol;Acc:MGI:1919240]
ENSMUSG00000038212	Hiatl1	129.03	221.36	-1.26673	0.0139789	hippocampus abundant transcript-like 1 [Source:MGI Symbol;Acc:MGI:1913881]
ENSMUSG00000006589	Aprt	826.334	448.851	1.26669	0.0033879	adenine phosphoribosyl transferase [Source:MGI Symbol;Acc:MGI:88061]
ENSMUSG00000057278	Snrpg	251.765	126.503	1.26651	0.00206809	small nuclear ribonucleoprotein polypeptide G [Source:MGI Symbol;Acc:MGI:1915261]
ENSMUSG00000023025	Larp4	2031.82	3613.92	-1.26619	0.00883157	La ribonucleoprotein domain family, member 4 [Source:MGI Symbol;Acc:MGI:2443114]
ENSMUSG00000027133	Nop10	229.815	120.801	1.26573	0.00439555	NOP10 ribonucleoprotein [Source:MGI Symbol;Acc:MGI:1913431]
ENSMUSG00000033020	Polr2f	234.515	120.537	1.26445	0.00359542	polymerase (RNA) II (DNA directed) polypeptide F [Source:MGI Symbol;Acc:MGI:1349393]
ENSMUSG00000090025	Gm16088	95.598	201.104	-1.26362	0.00880184	predicted gene 16088 [Source:MGI Symbol;Acc:MGI:3801900]
ENSMUSG00000022354	Ndufb9	137.406	69.5368	1.2633	0.0075071	NADH dehydrogenase (ubiquinone) 1 beta subcomplex, 9 [Source:MGI Symbol;Acc:MGI:1913468]
ENSMUSG00000053581	Zfand2a	141.519	218.897	-1.2628	0.00535149	zinc finger, AN1-type domain 2A [Source:MGI Symbol;Acc:MGI:2140729]
ENSMUSG00000032601	Prkar2a	36.1789	56.0611	-1.26273	0.0449604	protein kinase, cAMP dependent regulatory, type II alpha [Source:MGI Symbol;Acc:MGI:108025]
ENSMUSG00000029007	Agtrap	65.6567	34.4356	1.26245	0.0297233	angiotensin II, type I receptor-associated protein [Source:MGI Symbol;Acc:MGI:1339977]
ENSMUSG00000039680	Mrps6	99.4155	53.7624	1.26244	0.0128231	mitochondrial ribosomal protein S6 [Source:MGI Symbol;Acc:MGI:2153111]
ENSMUSG00000034165	Ccnd3	174.34	217.128	-1.26122	0.00946589	cyclin D3 [Source:MGI Symbol;Acc:MGI:88315]
ENSMUSG00000027999	Pla2g12a	122.472	60.7051	1.26066	0.00837972	phospholipase A2, group XIIA [Source:MGI Symbol;Acc:MGI:1913600]
ENSMUSG00000021598	Med10	318.116	158.721	1.25917	0.00177361	mediator complex subunit 10 [Source:MGI Symbol;Acc:MGI:106331]
ENSMUSG00000080893	Gm15920	54.182	25.5472	1.25686	0.0487188	predicted gene 15920 [Source:MGI Symbol;Acc:MGI:3801934]
ENSMUSG00000032307	Ube2q2	270.863	470.26	-1.2567	0.0164349	ubiquitin-conjugating enzyme E2Q (putative) 2 [Source:MGI Symbol;Acc:MGI:2388672]
ENSMUSG00000020048	Hsp90b1	88.128	130.563	-1.25543	0.0151291	heat shock protein 90, beta (Grp94), member 1 [Source:MGI Symbol;Acc:MGI:98817]
ENSMUSG00000010110	Stx5a	72.0987	37.8485	1.2553	0.0279566	syntaxin 5A [Source:MGI Symbol;Acc:MGI:1928483]
ENSMUSG00000029833	Trim24	63.3775	143.075	-1.25391	0.0153663	tripartite motif-containing 24 [Source:MGI Symbol;Acc:MGI:109275]
ENSMUSG00000034932	Mrpl54	86.6881	44.3456	1.2528	0.018657	mitochondrial ribosomal protein L54 [Source:MGI Symbol;Acc:MGI:1913297]
ENSMUSG00000033933	Vhl	119.404	229.596	-1.25162	0.01065	von Hippel-Lindau tumor suppressor [Source:MGI Symbol;Acc:MGI:103223]
ENSMUSG00000022178	Ajuba	39.7172	57.8292	-1.25134	0.0466746	ajuba LIM protein [Source:MGI Symbol;Acc:MGI:1341886]
ENSMUSG00000061360	Phf5a	369.078	186.785	1.25068	0.00119443	PHD finger protein 5A [Source:MGI Symbol;Acc:MGI:2156864]
ENSMUSG00000039050	Osbpl2	45.4692	81.3539	-1.25019	0.0409923	oxysterol binding protein-like 2 [Source:MGI Symbol;Acc:MGI:2442832]
ENSMUSG00000067995	Gtf2f2	192.906	92.8201	1.24988	0.00338249	general transcription factor IIF, polypeptide 2 [Source:MGI Symbol;Acc:MGI:1915955]
ENSMUSG00000022957	Itsn1	44.6027	78.366	-1.24917	0.0404705	intersectin 1 (SH3 domain protein 1A) [Source:MGI Symbol;Acc:MGI:1338069]
ENSMUSG00000038816	Ctnnal1	127.063	225.997	-1.24855	0.00649042	catenin (cadherin associated protein), alpha-like 1 [Source:MGI Symbol;Acc:MGI:1859649]
ENSMUSG00000073468	Sft2d1	101.234	50.4885	1.24683	0.0146942	SFT2 domain containing 1 [Source:MGI Symbol;Acc:MGI:1918689]
ENSMUSG00000031004	Mki67	48.1304	130.803	-1.24576	0.0155456	antigen identified by monoclonal antibody Ki 67 [Source:MGI Symbol;Acc:MGI:106035]
ENSMUSG00000027255	Arfgap2	84.1053	160.216	-1.2438	0.016005	ADP-ribosylation factor GTPase activating protein 2 [Source:MGI Symbol;Acc:MGI:1924288]
ENSMUSG00000031546	Gins4	324.887	175.357	1.24315	0.00180609	GINS complex subunit 4 (Sld5 homolog) [Source:MGI Symbol;Acc:MGI:1923847]
ENSMUSG00000030750	Nsmce1	149.639	74.9401	1.24195	0.00651711	non-SMC element 1 homolog (S. cerevisiae) [Source:MGI Symbol;Acc:MGI:1914961]
ENSMUSG00000041084	Ostc	101.214	51.7946	1.24108	0.01502	oligosaccharyltransferase complex subunit [Source:MGI Symbol;Acc:MGI:1913607]
ENSMUSG00000018858	Ict1	138.726	71.9908	1.24085	0.00980766	immature colon carcinoma transcript 1 [Source:MGI Symbol;Acc:MGI:1915822]
ENSMUSG00000022174	Dad1	260.807	138.029	1.24072	0.00226071	defender against cell death 1 [Source:MGI Symbol;Acc:MGI:101912]
ENSMUSG00000027411	Vps16	90.4391	105.418	-1.23941	0.0336276	vacuolar protein sorting 16 (yeast) [Source:MGI Symbol;Acc:MGI:2136772]
ENSMUSG00000043411	Usp48	374.997	716.784	-1.23936	0.00292512	ubiquitin specific peptidase 48 [Source:MGI Symbol;Acc:MGI:2158502]
ENSMUSG00000030058	Copg1	107.795	146.091	-1.23931	0.0209493	coatomer protein complex, subunit gamma 1 [Source:MGI Symbol;Acc:MGI:1858696]
ENSMUSG00000031843	Mphosph6	120.061	60.4451	1.2391	0.0099454	M phase phosphoprotein 6 [Source:MGI Symbol;Acc:MGI:1915783]
ENSMUSG00000096768	Erdr1	338.808	164.611	1.23898	0.00691581	erythroid differentiation regulator 1 [Source:MGI Symbol;Acc:MGI:2384747]
ENSMUSG00000064368	mt-Nd6	315.397	177.537	1.23892	0.00309448	mitochondrially encoded NADH dehydrogenase 6 [Source:MGI Symbol;Acc:MGI:102495]
ENSMUSG00000014504	Srp19	219.077	114.403	1.23758	0.00361933	signal recognition particle 19 [Source:MGI Symbol;Acc:MGI:1913634]
ENSMUSG00000020458	Rtn4	107.445	200.337	-1.23412	0.0060409	reticulon 4 [Source:MGI Symbol;Acc:MGI:1915835]
ENSMUSG00000042508	Dmtf1	92.856	183.297	-1.23301	0.0107739	cyclin D binding myb-like transcription factor 1 [Source:MGI Symbol;Acc:MGI:1344415]
ENSMUSG00000022360	Atad2	34.2633	73.2684	-1.23293	0.044009	ATPase family, AAA domain containing 2 [Source:MGI Symbol;Acc:MGI:1917722]
ENSMUSG00000032788	Pdxk	2259.79	1222.46	1.23288	0.0101301	pyridoxal (pyridoxine, vitamin B6) kinase [Source:MGI Symbol;Acc:MGI:1351869]
ENSMUSG00000044155	Lsm8	120.684	61.922	1.23208	0.0109843	LSM8 homolog, U6 small nuclear RNA associated (S. cerevisiae) [Source:MGI Symbol;Acc:MGI:1923772]
ENSMUSG00000058927	Gm10053	198.554	99.0668	1.23057	0.00373208	predicted gene 10053 [Source:MGI Symbol;Acc:MGI:3704493]
ENSMUSG00000031021	Tmem9b	63.6599	33.3395	1.23055	0.0496395	TMEM9 domain family, member B [Source:MGI Symbol;Acc:MGI:1915254]
ENSMUSG00000056050	Mia3	45.5827	83.2244	-1.2304	0.0262463	melanoma inhibitory activity 3 [Source:MGI Symbol;Acc:MGI:2443183]
ENSMUSG00000021520	Uqcrb	380.94	191.852	1.23007	0.0013618	ubiquinol-cytochrome c reductase binding protein [Source:MGI Symbol;Acc:MGI:1914780]
ENSMUSG00000001056	Nhp2	940.329	486.43	1.22971	0.00251404	NHP2 ribonucleoprotein [Source:MGI Symbol;Acc:MGI:1098547]
ENSMUSG00000031762	Mt2	416.277	240.176	1.22958	0.00494464	metallothionein 2 [Source:MGI Symbol;Acc:MGI:97172]
ENSMUSG00000026895	Ndufa8	95.705	49.1485	1.22956	0.0379228	NADH dehydrogenase (ubiquinone) 1 alpha subcomplex, 8 [Source:MGI Symbol;Acc:MGI:1915625]
ENSMUSG00000039068	Zzz3	124.726	194.911	-1.22948	0.00580671	zinc finger, ZZ domain containing 3 [Source:MGI Symbol;Acc:MGI:1920453]
ENSMUSG00000000301	Pemt	1384.06	712.52	1.22841	0.00523499	phosphatidylethanolamine N-methyltransferase [Source:MGI Symbol;Acc:MGI:104535]
ENSMUSG00000005510	Ndufs3	125.148	64.0391	1.22658	0.0110761	NADH dehydrogenase (ubiquinone) Fe-S protein 3 [Source:MGI Symbol;Acc:MGI:1915599]
ENSMUSG00000024099	Ndufv2	228.679	120.214	1.22581	0.00350267	NADH dehydrogenase (ubiquinone) flavoprotein 2 [Source:MGI Symbol;Acc:MGI:1920150]
ENSMUSG00000081051	Gm15427	661.623	347.167	1.22402	0.00466414	predicted pseudogene 15427 [Source:MGI Symbol;Acc:MGI:3642341]
ENSMUSG00000022956	Atp5o	295.331	147.872	1.22375	0.00532664	ATP synthase, H+ transporting, mitochondrial F1 complex, O subunit [Source:MGI Symbol;Acc:MGI:106341]
ENSMUSG00000058267	Mrps14	149.716	71.5746	1.2226	0.00849193	mitochondrial ribosomal protein S14 [Source:MGI Symbol;Acc:MGI:1928141]
ENSMUSG00000031812	Map1lc3b	5990.72	3152.02	1.2214	0.0115131	microtubule-associated protein 1 light chain 3 beta [Source:MGI Symbol;Acc:MGI:1914693]
ENSMUSG00000053565	Eif3k	326.349	173.276	1.2207	0.00295101	eukaryotic translation initiation factor 3, subunit K [Source:MGI Symbol;Acc:MGI:1921080]
ENSMUSG00000079478	Sssca1	185.303	91.5513	1.22057	0.00645349	Sjogren's syndrome/scleroderma autoantigen 1 homolog (human) [Source:MGI Symbol;Acc:MGI:1913482]
ENSMUSG00000002660	Clpp	321.279	170.647	1.22	0.00156283	caseinolytic mitochondrial matrix peptidase proteolytic subunit [Source:MGI Symbol;Acc:MGI:1858213]
ENSMUSG00000026926	Pmpca	135.984	159.913	-1.21982	0.0198929	peptidase (mitochondrial processing) alpha [Source:MGI Symbol;Acc:MGI:1918568]
ENSMUSG00000033916	Chmp2a	183.12	91.1556	1.21978	0.0139742	charged multivesicular body protein 2A [Source:MGI Symbol;Acc:MGI:1916203]
ENSMUSG00000029504	Ddx51	49.1799	67.8095	-1.21918	0.0402604	DEAD (Asp-Glu-Ala-Asp) box polypeptide 51 [Source:MGI Symbol;Acc:MGI:1916913]
ENSMUSG00000083149	Gm11380	166.06	91.0267	1.21779	0.00866409	predicted gene 11380 [Source:MGI Symbol;Acc:MGI:3650782]
ENSMUSG00000027710	Acad9	56.5308	86.0093	-1.21715	0.030303	acyl-Coenzyme A dehydrogenase family, member 9 [Source:MGI Symbol;Acc:MGI:1914272]
ENSMUSG00000020900	Myh10	64.8432	126.083	-1.21667	0.0204935	myosin, heavy polypeptide 10, non-muscle [Source:MGI Symbol;Acc:MGI:1930780]
ENSMUSG00000036777	Anln	125.857	214.103	-1.2164	0.0161455	anillin, actin binding protein [Source:MGI Symbol;Acc:MGI:1920174]
ENSMUSG00000029910	Mad2l1	188.914	90.6709	1.21631	0.00564844	MAD2 mitotic arrest deficient-like 1 [Source:MGI Symbol;Acc:MGI:1860374]
ENSMUSG00000027668	Mfn1	158.153	290.728	-1.2161	0.00706118	mitofusin 1 [Source:MGI Symbol;Acc:MGI:1914664]
ENSMUSG00000030602	Pak4	78.6593	148.18	-1.21609	0.0163525	p21 protein (Cdc42/Rac)-activated kinase 4 [Source:MGI Symbol;Acc:MGI:1917834]
ENSMUSG00000020180	Snrpd3	385.366	195.499	1.21508	0.00186321	small nuclear ribonucleoprotein D3 [Source:MGI Symbol;Acc:MGI:1914582]
ENSMUSG00000046323	Dppa3	4584.82	2346.74	1.21438	0.00851247	developmental pluripotency-associated 3 [Source:MGI Symbol;Acc:MGI:1920958]
ENSMUSG00000023089	Ndufa5	133.007	63.5218	1.21386	0.0116479	NADH dehydrogenase (ubiquinone) 1 alpha subcomplex, 5 [Source:MGI Symbol;Acc:MGI:1915452]
ENSMUSG00000031858	Mau2	66.3314	121.316	-1.21164	0.0464257	MAU2 chromatid cohesion factor homolog (C. elegans) [Source:MGI Symbol;Acc:MGI:1921799]
ENSMUSG00000022706	Mrpl40	196.468	103.049	1.21156	0.00401383	mitochondrial ribosomal protein L40 [Source:MGI Symbol;Acc:MGI:1332635]
ENSMUSG00000058638	Zfp110	42.0414	76.7125	-1.21138	0.041183	zinc finger protein 110 [Source:MGI Symbol;Acc:MGI:1890378]
ENSMUSG00000060227	Casc4	102.976	203.918	-1.21088	0.00964474	cancer susceptibility candidate 4 [Source:MGI Symbol;Acc:MGI:2443129]
ENSMUSG00000027957	Slc35a3	62.6502	103.759	-1.21031	0.0352297	solute carrier family 35 (UDP-N-acetylglucosamine (UDP-GlcNAc) transporter), member 3 [Source:MGI Symbol;Acc:MGI:1917648]
ENSMUSG00000027309	4930402H24Rik	62.3936	107.703	-1.20938	0.0228719	RIKEN cDNA 4930402H24 gene [Source:MGI Symbol;Acc:MGI:1923029]
ENSMUSG00000020463	Smek2	56.5367	89.6361	-1.20917	0.0469432	SMEK homolog 2, suppressor of mek1 (Dictyostelium) [Source:MGI Symbol;Acc:MGI:2144474]
ENSMUSG00000052962	Mrpl35	111.805	57.3608	1.20901	0.0219109	mitochondrial ribosomal protein L35 [Source:MGI Symbol;Acc:MGI:1913473]
ENSMUSG00000047721	Bola2	140.003	77.0267	1.2084	0.0127849	bolA-like 2 (E. coli) [Source:MGI Symbol;Acc:MGI:1913412]
ENSMUSG00000024875	Yif1a	156.748	75.3688	1.20835	0.0105201	Yip1 interacting factor homolog A (S. cerevisiae) [Source:MGI Symbol;Acc:MGI:1915340]
ENSMUSG00000055553	Kxd1	172.682	95.2959	1.20625	0.00748348	KxDL motif containing 1 [Source:MGI Symbol;Acc:MGI:1922870]
ENSMUSG00000038366	Lasp1	204.494	317.194	-1.20521	0.0162437	LIM and SH3 protein 1 [Source:MGI Symbol;Acc:MGI:109656]
ENSMUSG00000004359	Spic	1492.47	796.986	1.20489	0.00629617	Spi-C transcription factor (Spi-1/PU.1 related) [Source:MGI Symbol;Acc:MGI:1341168]
ENSMUSG00000026623	Lpgat1	81.6536	128.818	-1.20457	0.0282303	lysophosphatidylglycerol acyltransferase 1 [Source:MGI Symbol;Acc:MGI:2446186]
ENSMUSG00000005506	Celf1	143.474	263.655	-1.20414	0.00970044	CUGBP, Elav-like family member 1 [Source:MGI Symbol;Acc:MGI:1342295]
ENSMUSG00000020485	Supt4a	299.63	159.222	1.20374	0.00407046	suppressor of Ty 4A [Source:MGI Symbol;Acc:MGI:107416]
ENSMUSG00000020022	Ndufa12	172.14	83.5562	1.20289	0.00864733	NADH dehydrogenase (ubiquinone) 1 alpha subcomplex, 12 [Source:MGI Symbol;Acc:MGI:1913664]
ENSMUSG00000021870	Slmap	68.9851	163.184	-1.20283	0.0135549	sarcolemma associated protein [Source:MGI Symbol;Acc:MGI:1933549]
ENSMUSG00000062248	Cks2	855.807	452.395	1.20279	0.00304376	CDC28 protein kinase regulatory subunit 2 [Source:MGI Symbol;Acc:MGI:1913447]
ENSMUSG00000020611	Gna13	42.8114	94.473	-1.20032	0.0446581	guanine nucleotide binding protein, alpha 13 [Source:MGI Symbol;Acc:MGI:95768]
ENSMUSG00000078919	Dpm1	135.165	66.6808	1.19982	0.0107776	dolichol-phosphate (beta-D) mannosyltransferase 1 [Source:MGI Symbol;Acc:MGI:1330239]
ENSMUSG00000034203	Chchd4	77.1306	39.2954	1.19942	0.0374217	coiled-coil-helix-coiled-coil-helix domain containing 4 [Source:MGI Symbol;Acc:MGI:1919420]
ENSMUSG00000071653	1810009A15Rik	149.692	83.7352	1.19922	0.0105458	RIKEN cDNA 1810009A15 gene [Source:MGI Symbol;Acc:MGI:1913526]
ENSMUSG00000028029	Aimp1	75.0334	37.0676	1.19885	0.0353235	aminoacyl tRNA synthetase complex-interacting multifunctional protein 1 [Source:MGI Symbol;Acc:MGI:102774]
ENSMUSG00000047613	A430005L14Rik	151.143	81.8713	1.19864	0.0139789	RIKEN cDNA A430005L14 gene [Source:MGI Symbol;Acc:MGI:2140680]
ENSMUSG00000052798	Nup107	72.8042	121.556	-1.19838	0.0227197	nucleoporin 107 [Source:MGI Symbol;Acc:MGI:2143854]
ENSMUSG00000024218	Taf11	58.1162	31.2468	1.1966	0.0462556	TAF11 RNA polymerase II, TATA box binding protein (TBP)-associated factor [Source:MGI Symbol;Acc:MGI:1916026]
ENSMUSG00000062963	Ufc1	112.395	57.9711	1.19649	0.0152453	ubiquitin-fold modifier conjugating enzyme 1 [Source:MGI Symbol;Acc:MGI:1913405]
ENSMUSG00000014301	Pam16	88.6263	48.7024	1.19533	0.0295649	presequence translocase-asssociated motor 16 homolog (S. cerevisiae) [Source:MGI Symbol;Acc:MGI:1913699]
ENSMUSG00000024309	Pfdn6	319.215	178.549	1.19508	0.00387077	prefoldin subunit 6 [Source:MGI Symbol;Acc:MGI:95908]
ENSMUSG00000031967	Afg3l1	60.9545	87.2309	-1.19481	0.0354551	AFG3-like AAA ATPase 1 [Source:MGI Symbol;Acc:MGI:1928277]
ENSMUSG00000000827	Tpd52l2	391.016	195.103	1.19388	0.00214985	tumor protein D52-like 2 [Source:MGI Symbol;Acc:MGI:1913564]
ENSMUSG00000035726	Supt16	138.798	186.26	-1.19373	0.00842943	suppressor of Ty 16 [Source:MGI Symbol;Acc:MGI:1890948]
ENSMUSG00000026024	Als2	59.2712	90.5162	-1.1925	0.0445128	amyotrophic lateral sclerosis 2 (juvenile) [Source:MGI Symbol;Acc:MGI:1921268]
ENSMUSG00000022111	Uchl3	147.035	76.663	1.19001	0.00946589	ubiquitin carboxyl-terminal esterase L3 (ubiquitin thiolesterase) [Source:MGI Symbol;Acc:MGI:1355274]
ENSMUSG00000018821	Avpi1	140.019	69.3473	1.18996	0.01262	arginine vasopressin-induced 1 [Source:MGI Symbol;Acc:MGI:1916784]
ENSMUSG00000063480	Nhp2l1	1032.5	572.082	1.18987	0.00299019	NHP2 non-histone chromosome protein 2-like 1 (S. cerevisiae) [Source:MGI Symbol;Acc:MGI:893586]
ENSMUSG00000083364	Llph-ps2	81.3816	41.6047	1.1894	0.0299861	LLP homolog, pseudogene 2 [Source:MGI Symbol;Acc:MGI:3642864]
ENSMUSG00000060152	Pop5	110.535	64.9432	1.18935	0.019042	processing of precursor 5, ribonuclease P/MRP family (S. cerevisiae) [Source:MGI Symbol;Acc:MGI:2151221]
ENSMUSG00000059474	Mbtd1	47.2899	93.6926	-1.18926	0.0308697	mbt domain containing 1 [Source:MGI Symbol;Acc:MGI:2143977]
ENSMUSG00000090000	Ier3ip1	65.552	32.9255	1.18912	0.0397369	immediate early response 3 interacting protein 1 [Source:MGI Symbol;Acc:MGI:1913441]
ENSMUSG00000022193	Psmb5	685.893	357.507	1.18825	0.00197834	proteasome (prosome, macropain) subunit, beta type 5 [Source:MGI Symbol;Acc:MGI:1194513]
ENSMUSG00000071054	Safb	81.7685	151.182	-1.18784	0.016283	scaffold attachment factor B [Source:MGI Symbol;Acc:MGI:2146974]
ENSMUSG00000047710	Champ1	61.7941	100.289	-1.1878	0.0378353	chromosome alignment maintaining phosphoprotein 1 [Source:MGI Symbol;Acc:MGI:1196398]
ENSMUSG00000022812	Gsk3b	65.4929	102.508	-1.18747	0.0245274	glycogen synthase kinase 3 beta [Source:MGI Symbol;Acc:MGI:1861437]
ENSMUSG00000025439	Clns1a	455.697	240.477	1.18669	0.00371671	chloride channel, nucleotide-sensitive, 1A [Source:MGI Symbol;Acc:MGI:109638]
ENSMUSG00000020954	Strn3	149.621	287.259	-1.18637	0.00635151	striatin, calmodulin binding protein 3 [Source:MGI Symbol;Acc:MGI:2151064]
ENSMUSG00000006998	Psmd2	323.97	453.586	-1.18635	0.0057498	proteasome (prosome, macropain) 26S subunit, non-ATPase, 2 [Source:MGI Symbol;Acc:MGI:1096584]
ENSMUSG00000022338	Eny2	69.5063	36.9948	1.18621	0.0351568	enhancer of yellow 2 homolog (Drosophila) [Source:MGI Symbol;Acc:MGI:1919286]
ENSMUSG00000027379	Bub1	56.2646	102.937	-1.186	0.038342	budding uninhibited by benzimidazoles 1 homolog (S. cerevisiae) [Source:MGI Symbol;Acc:MGI:1100510]
ENSMUSG00000022710	Usp7	187.825	314.367	-1.18575	0.00831451	ubiquitin specific peptidase 7 [Source:MGI Symbol;Acc:MGI:2182061]
ENSMUSG00000039159	Ube2h	121.44	216.377	-1.18478	0.0101122	ubiquitin-conjugating enzyme E2H [Source:MGI Symbol;Acc:MGI:104632]
ENSMUSG00000038646	Fam103a1	167.425	90.6788	1.18426	0.0113024	family with sequence similarity 103, member A1 [Source:MGI Symbol;Acc:MGI:1914398]
ENSMUSG00000041881	Ndufa7	120.885	66.1039	1.18343	0.0141408	NADH dehydrogenase (ubiquinone) 1 alpha subcomplex, 7 (B14.5a) [Source:MGI Symbol;Acc:MGI:1913666]
ENSMUSG00000030417	Pdcd5	130.654	69.7516	1.18324	0.0162937	programmed cell death 5 [Source:MGI Symbol;Acc:MGI:1913538]
ENSMUSG00000036438	Calm2	519.924	270.797	1.18263	0.00179097	calmodulin 2 [Source:MGI Symbol;Acc:MGI:103250]
ENSMUSG00000096483	Gm12615	1369.6	823.366	1.18121	0.00703334	predicted gene 12615 [Source:MGI Symbol;Acc:MGI:3649882]
ENSMUSG00000037152	Ndufc1	98.8291	48.7596	1.18081	0.0209005	NADH dehydrogenase (ubiquinone) 1, subcomplex unknown, 1 [Source:MGI Symbol;Acc:MGI:1913627]
ENSMUSG00000026933	Camsap1	35.2524	83.6709	-1.18008	0.0397369	calmodulin regulated spectrin-associated protein 1 [Source:MGI Symbol;Acc:MGI:3036242]
ENSMUSG00000008036	Ap2s1	136.168	74.3056	1.18006	0.0424204	adaptor-related protein complex 2, sigma 1 subunit [Source:MGI Symbol;Acc:MGI:2141861]
ENSMUSG00000025794	Rpl14	769.967	409.767	1.17999	0.00583023	ribosomal protein L14 [Source:MGI Symbol;Acc:MGI:1914365]
ENSMUSG00000026034	Clk1	83.6657	36.7911	1.17925	0.0354304	CDC-like kinase 1 [Source:MGI Symbol;Acc:MGI:107403]
ENSMUSG00000003824	Syce2	122.592	58.1493	1.17841	0.0190095	synaptonemal complex central element protein 2 [Source:MGI Symbol;Acc:MGI:1919096]
ENSMUSG00000021629	Slc30a5	69.3436	118.4	-1.17828	0.0248739	solute carrier family 30 (zinc transporter), member 5 [Source:MGI Symbol;Acc:MGI:1916298]
ENSMUSG00000025155	Dus1l	61.6123	92.3742	-1.17792	0.0312387	dihydrouridine synthase 1-like (S. cerevisiae) [Source:MGI Symbol;Acc:MGI:1915980]
ENSMUSG00000020089	Ppa1	77.703	31.3335	1.17626	0.0399037	pyrophosphatase (inorganic) 1 [Source:MGI Symbol;Acc:MGI:97831]
ENSMUSG00000045128	Rpl18a	888.518	481.846	1.17604	0.00600666	ribosomal protein L18A [Source:MGI Symbol;Acc:MGI:1924058]
ENSMUSG00000028692	Akr1a1	407.39	202.504	1.17508	0.00386442	aldo-keto reductase family 1, member A1 (aldehyde reductase) [Source:MGI Symbol;Acc:MGI:1929955]
ENSMUSG00000025868	Higd2a	141.824	81.7434	1.17443	0.0131967	HIG1 domain family, member 2A [Source:MGI Symbol;Acc:MGI:1914294]
ENSMUSG00000043962	Thrap3	54.4088	108.193	-1.17439	0.0317264	thyroid hormone receptor associated protein 3 [Source:MGI Symbol;Acc:MGI:2442637]
ENSMUSG00000083410	Gm14300	450.31	925.94	-1.17382	0.00846955	predicted gene 14300 [Source:MGI Symbol;Acc:MGI:3650106]
ENSMUSG00000028367	Txn1	91.8044	50.2601	1.17334	0.0263184	thioredoxin 1 [Source:MGI Symbol;Acc:MGI:98874]
ENSMUSG00000027722	Spata5	51.9883	89.7259	-1.17323	0.0413398	spermatogenesis associated 5 [Source:MGI Symbol;Acc:MGI:1927170]
ENSMUSG00000051853	Arf3	61.9091	101.018	-1.17235	0.0279566	ADP-ribosylation factor 3 [Source:MGI Symbol;Acc:MGI:99432]
ENSMUSG00000028345	Tex10	79.0334	139.772	-1.17106	0.0195115	testis expressed gene 10 [Source:MGI Symbol;Acc:MGI:1344413]
ENSMUSG00000017386	Traf4	51.9696	77.9775	-1.17089	0.0397212	TNF receptor associated factor 4 [Source:MGI Symbol;Acc:MGI:1202880]
ENSMUSG00000100725		620.796	1068.45	-1.17028	0.011438	Heterogeneous nuclear ribonucleoprotein U; Heterogeneous nuclear ribonucleoprotein U, isoform CRA_b [Source:UniProtKB/TrEMBL;Acc:G3XA10]
ENSMUSG00000022391	Rangap1	246.58	398.114	-1.16932	0.00742757	RAN GTPase activating protein 1 [Source:MGI Symbol;Acc:MGI:103071]
ENSMUSG00000033161	Atp1a1	53.8416	128.52	-1.16909	0.0217049	ATPase, Na+/K+ transporting, alpha 1 polypeptide [Source:MGI Symbol;Acc:MGI:88105]
ENSMUSG00000032002	Dcun1d5	143.2	75.6601	1.16854	0.0121414	DCN1, defective in cullin neddylation 1, domain containing 5 (S. cerevisiae) [Source:MGI Symbol;Acc:MGI:1924113]
ENSMUSG00000061079	Zfp143	97.4816	152.181	-1.16818	0.0242753	zinc finger protein 143 [Source:MGI Symbol;Acc:MGI:1277969]
ENSMUSG00000050732	Vamp8	195.343	108.092	1.16813	0.00513172	vesicle-associated membrane protein 8 [Source:MGI Symbol;Acc:MGI:1336882]
ENSMUSG00000062611	Rps3a2	145.118	95.5563	1.16804	0.0108029	ribosomal protein S3A2 [Source:MGI Symbol;Acc:MGI:3642853]
ENSMUSG00000021290	2010107E04Rik	205.859	109.042	1.16723	0.00475035	RIKEN cDNA 2010107E04 gene [Source:MGI Symbol;Acc:MGI:1917507]
ENSMUSG00000055884	Fancm	146.222	249.862	-1.16665	0.0075071	Fanconi anemia, complementation group M [Source:MGI Symbol;Acc:MGI:2442306]
ENSMUSG00000021930	Spryd7	124.234	68.9339	1.16571	0.0216468	SPRY domain containing 7 [Source:MGI Symbol;Acc:MGI:1913924]
ENSMUSG00000015474	Ppt2	258.452	466.036	-1.16336	0.00439367	palmitoyl-protein thioesterase 2 [Source:MGI Symbol;Acc:MGI:1860075]
ENSMUSG00000060073	Psma3	772.972	406.859	1.16251	0.0033894	proteasome (prosome, macropain) subunit, alpha type 3 [Source:MGI Symbol;Acc:MGI:104883]
ENSMUSG00000036160	Surf6	67.155	128.066	-1.16201	0.026301	surfeit gene 6 [Source:MGI Symbol;Acc:MGI:98447]
ENSMUSG00000050953	Gja1	465.959	712.866	-1.16091	0.016092	gap junction protein, alpha 1 [Source:MGI Symbol;Acc:MGI:95713]
ENSMUSG00000051316	Taf7	107.81	63.4583	1.16032	0.0190095	TAF7 RNA polymerase II, TATA box binding protein (TBP)-associated factor [Source:MGI Symbol;Acc:MGI:1346348]
ENSMUSG00000061244	Exoc5	48.2523	85.2957	-1.15862	0.0485286	exocyst complex component 5 [Source:MGI Symbol;Acc:MGI:2145645]
ENSMUSG00000014294	Ndufa2	88.4316	44.3536	1.15826	0.0342008	NADH dehydrogenase (ubiquinone) 1 alpha subcomplex, 2 [Source:MGI Symbol;Acc:MGI:1343103]
ENSMUSG00000027099	Mtx2	114.864	60.8599	1.15813	0.0227701	metaxin 2 [Source:MGI Symbol;Acc:MGI:1859652]
ENSMUSG00000037204	Atg101	407.546	231.41	1.1552	0.00343249	autophagy related 101 [Source:MGI Symbol;Acc:MGI:1915368]
ENSMUSG00000027429	Sec23b	98.1809	144.657	-1.15517	0.0258489	SEC23B (S. cerevisiae) [Source:MGI Symbol;Acc:MGI:1350925]
ENSMUSG00000019054	Fis1	136.917	67.3321	1.15502	0.0160138	fission 1 (mitochondrial outer membrane) homolog (yeast) [Source:MGI Symbol;Acc:MGI:1913687]
ENSMUSG00000003779	Kif20a	255.35	400.571	-1.15185	0.00633578	kinesin family member 20A [Source:MGI Symbol;Acc:MGI:1201682]
ENSMUSG00000036845	Lin37	74.2714	43.4113	1.15097	0.0455179	lin-37 homolog (C. elegans) [Source:MGI Symbol;Acc:MGI:1922910]
ENSMUSG00000031823	Zdhhc7	65.8549	109.77	-1.15045	0.0272707	zinc finger, DHHC domain containing 7 [Source:MGI Symbol;Acc:MGI:2142662]
ENSMUSG00000040413	Timd2	7379.89	3883.88	1.15007	0.0175671	T cell immunoglobulin and mucin domain containing 2 [Source:MGI Symbol;Acc:MGI:2159681]
ENSMUSG00000026473	Glul	422.039	226.112	1.14982	0.00474617	glutamate-ammonia ligase (glutamine synthetase) [Source:MGI Symbol;Acc:MGI:95739]
ENSMUSG00000029632	Ndufa4	199.584	103.395	1.14881	0.0072543	NADH dehydrogenase (ubiquinone) 1 alpha subcomplex, 4 [Source:MGI Symbol;Acc:MGI:107686]
ENSMUSG00000001707	Eef1e1	277.778	138.77	1.14633	0.00473436	eukaryotic translation elongation factor 1 epsilon 1 [Source:MGI Symbol;Acc:MGI:1913393]
ENSMUSG00000029642	Polr1d	188.342	102.604	1.14453	0.0104039	polymerase (RNA) I polypeptide D [Source:MGI Symbol;Acc:MGI:108403]
ENSMUSG00000084034	Gm12617	839.359	436.215	1.14445	0.00515591	predicted gene 12617 [Source:MGI Symbol;Acc:MGI:3649880]
ENSMUSG00000021024	Psma6	1003.62	549.055	1.14354	0.00462531	proteasome (prosome, macropain) subunit, alpha type 6 [Source:MGI Symbol;Acc:MGI:1347006]
ENSMUSG00000043284	Tmem11	148.578	81.2272	1.14286	0.0155512	transmembrane protein 11 [Source:MGI Symbol;Acc:MGI:2144726]
ENSMUSG00000025925	Terf1	298.908	163.83	1.14061	0.00419845	telomeric repeat binding factor 1 [Source:MGI Symbol;Acc:MGI:109634]
ENSMUSG00000012848	Rps5	784.258	424.509	1.14059	0.01121	ribosomal protein S5 [Source:MGI Symbol;Acc:MGI:1097682]
ENSMUSG00000032560	Dnajc13	48.3947	93.9184	-1.14022	0.0363634	DnaJ (Hsp40) homolog, subfamily C, member 13 [Source:MGI Symbol;Acc:MGI:2676368]
ENSMUSG00000022452	Smdt1	90.213	47.4696	1.14011	0.0345814	single-pass membrane protein with aspartate rich tail 1 [Source:MGI Symbol;Acc:MGI:1916279]
ENSMUSG00000030082	Sec61a1	126.519	203.538	-1.13941	0.0103686	Sec61 alpha 1 subunit (S. cerevisiae) [Source:MGI Symbol;Acc:MGI:1858417]
ENSMUSG00000021843	Ktn1	63.7641	130.465	-1.13807	0.0300682	kinectin 1 [Source:MGI Symbol;Acc:MGI:109153]
ENSMUSG00000062981	Mrpl42	155.444	84.2583	1.13781	0.0127561	mitochondrial ribosomal protein L42 [Source:MGI Symbol;Acc:MGI:1333774]
ENSMUSG00000032518	Rpsa	872.685	469.34	1.13764	0.00871326	ribosomal protein SA [Source:MGI Symbol;Acc:MGI:105381]
ENSMUSG00000034868	Myl12b	173.374	89.9671	1.13531	0.0128193	myosin, light chain 12B, regulatory [Source:MGI Symbol;Acc:MGI:107494]
ENSMUSG00000075701	Vimp	204.675	116.467	1.13458	0.00609856	VCP-interacting membrane protein [Source:MGI Symbol;Acc:MGI:95994]
ENSMUSG00000039771	Polr2j	219.43	121.238	1.13321	0.00714725	polymerase (RNA) II (DNA directed) polypeptide J [Source:MGI Symbol;Acc:MGI:109582]
ENSMUSG00000084786	Ubl5	158.619	94.1755	1.13242	0.0124944	ubiquitin-like 5 [Source:MGI Symbol;Acc:MGI:1913427]
ENSMUSG00000001403	Ube2c	1161.15	621.967	1.13042	0.00609856	ubiquitin-conjugating enzyme E2C [Source:MGI Symbol;Acc:MGI:1915862]
ENSMUSG00000026021	Sumo1	1003.14	575.534	1.13036	0.00503406	SMT3 suppressor of mif two 3 homolog 1 (yeast) [Source:MGI Symbol;Acc:MGI:1197010]
ENSMUSG00000026281	Dtymk	200.615	107.156	1.12947	0.00762739	deoxythymidylate kinase [Source:MGI Symbol;Acc:MGI:108396]
ENSMUSG00000091537	Tma7	380.731	207.596	1.12931	0.00397176	translational machinery associated 7 homolog (S. cerevisiae) [Source:MGI Symbol;Acc:MGI:1913417]
ENSMUSG00000021018	Polr2h	210.148	118.898	1.12869	0.00813509	polymerase (RNA) II (DNA directed) polypeptide H [Source:MGI Symbol;Acc:MGI:2384309]
ENSMUSG00000026799	Med27	189.992	102.037	1.12842	0.0103112	mediator complex subunit 27 [Source:MGI Symbol;Acc:MGI:1916225]
ENSMUSG00000021576	Pdcd6	211.567	129.798	1.12717	0.00997012	programmed cell death 6 [Source:MGI Symbol;Acc:MGI:109283]
ENSMUSG00000049339	Fam134a	55.8683	122.674	-1.12707	0.0294968	family with sequence similarity 134, member A [Source:MGI Symbol;Acc:MGI:2388278]
ENSMUSG00000021595	Nsun2	351.361	588.103	-1.12625	0.00811629	NOL1/NOP2/Sun domain family member 2 [Source:MGI Symbol;Acc:MGI:107252]
ENSMUSG00000020018	Snrpf	113.964	64.3139	1.1256	0.0266494	small nuclear ribonucleoprotein polypeptide F [Source:MGI Symbol;Acc:MGI:1917128]
ENSMUSG00000038690	Atp5j2	156.781	85.7376	1.12521	0.0186475	ATP synthase, H+ transporting, mitochondrial F0 complex, subunit F2 [Source:MGI Symbol;Acc:MGI:1927558]
ENSMUSG00000029169	Dhx15	170.302	283.669	-1.12464	0.0127537	DEAH (Asp-Glu-Ala-His) box polypeptide 15 [Source:MGI Symbol;Acc:MGI:1099786]
ENSMUSG00000042729	Wdr74	523.663	290.333	1.12439	0.00435751	WD repeat domain 74 [Source:MGI Symbol;Acc:MGI:2147427]
ENSMUSG00000013663	Pten	91.3165	176.76	-1.1243	0.0256056	phosphatase and tensin homolog [Source:MGI Symbol;Acc:MGI:109583]
ENSMUSG00000000441	Raf1	97.7873	147.684	-1.12319	0.024003	v-raf-leukemia viral oncogene 1 [Source:MGI Symbol;Acc:MGI:97847]
ENSMUSG00000029394	Cdk2ap1	1093.69	594.531	1.12262	0.00714725	CDK2 (cyclin-dependent kinase 2)-associated protein 1 [Source:MGI Symbol;Acc:MGI:1202069]
ENSMUSG00000002222	Rmnd5a	51.574	90.8259	-1.12185	0.0470617	required for meiotic nuclear division 5 homolog A (S. cerevisiae) [Source:MGI Symbol;Acc:MGI:1915727]
ENSMUSG00000053453	Thoc7	236.183	127.533	1.1202	0.0105384	THO complex 7 homolog (Drosophila) [Source:MGI Symbol;Acc:MGI:1913481]
ENSMUSG00000083068	Gm11800	227.585	423.431	-1.11943	0.00985132	predicted gene 11800 [Source:MGI Symbol;Acc:MGI:3650447]
ENSMUSG00000016252	Atp5e	120.218	65.4163	1.11887	0.0338007	ATP synthase, H+ transporting, mitochondrial F1 complex, epsilon subunit [Source:MGI Symbol;Acc:MGI:1855697]
ENSMUSG00000029649	Pomp	348.354	183.676	1.11877	0.00417954	proteasome maturation protein [Source:MGI Symbol;Acc:MGI:1913787]
ENSMUSG00000049760	2410015M20Rik	83.1531	43.9039	1.11814	0.0387483	RIKEN cDNA 2410015M20 gene [Source:MGI Symbol;Acc:MGI:2442174]
ENSMUSG00000021243	Fcf1	359.847	200.959	1.11632	0.00552259	FCF1 small subunit (SSU) processome component homolog (S. cerevisiae) [Source:MGI Symbol;Acc:MGI:1920986]
ENSMUSG00000056941	Commd7	152.926	90.6777	1.11573	0.0181138	COMM domain containing 7 [Source:MGI Symbol;Acc:MGI:1914197]
ENSMUSG00000006818	Sod2	397.056	214.898	1.11562	0.00811629	superoxide dismutase 2, mitochondrial [Source:MGI Symbol;Acc:MGI:98352]
ENSMUSG00000041763	Tpp2	84.1807	130.266	-1.1143	0.0364199	tripeptidyl peptidase II [Source:MGI Symbol;Acc:MGI:102724]
ENSMUSG00000007338	Mrpl49	165.133	93.6838	1.1143	0.0149847	mitochondrial ribosomal protein L49 [Source:MGI Symbol;Acc:MGI:108180]
ENSMUSG00000079658	Tceb1	2355.67	1332.83	1.11359	0.0124944	transcription elongation factor B (SIII), polypeptide 1 [Source:MGI Symbol;Acc:MGI:1915173]
ENSMUSG00000020914	Top2a	171.184	308.085	-1.11358	0.0143536	topoisomerase (DNA) II alpha [Source:MGI Symbol;Acc:MGI:98790]
ENSMUSG00000070343	Gm10288	201.481	108.522	1.11344	0.0123727	predicted gene 10288 [Source:MGI Symbol;Acc:MGI:3704227]
ENSMUSG00000068823	Csde1	440.174	733.741	-1.11305	0.00967671	cold shock domain containing E1, RNA binding [Source:MGI Symbol;Acc:MGI:92356]
ENSMUSG00000075602	Ly6a	181.534	93.5562	1.11238	0.0149909	lymphocyte antigen 6 complex, locus A [Source:MGI Symbol;Acc:MGI:107527]
ENSMUSG00000026192	Atic	76.5774	46.7661	1.11151	0.0452609	5-aminoimidazole-4-carboxamide ribonucleotide formyltransferase/IMP cyclohydrolase [Source:MGI Symbol;Acc:MGI:1351352]
ENSMUSG00000038697	Taf5l	96.1846	137.762	-1.11063	0.0247046	TAF5-like RNA polymerase II, p300/CBP-associated factor (PCAF)-associated factor [Source:MGI Symbol;Acc:MGI:1919039]
ENSMUSG00000093798	Gm8355	357.955	190.773	1.10962	0.024027	predicted pseudogene 8355 [Source:MGI Symbol;Acc:MGI:3645191]
ENSMUSG00000078941	Ak6	468.254	263.169	1.1087	0.00505564	adenylate kinase 6 [Source:MGI Symbol;Acc:MGI:5510732]
ENSMUSG00000031848	Lsm4	175.481	98.7714	1.10829	0.0139114	LSM4 homolog, U6 small nuclear RNA associated (S. cerevisiae) [Source:MGI Symbol;Acc:MGI:1354692]
ENSMUSG00000050856	Atp5k	143.681	80.2911	1.10802	0.023882	ATP synthase, H+ transporting, mitochondrial F1F0 complex, subunit E [Source:MGI Symbol;Acc:MGI:106636]
ENSMUSG00000039183	Nubp2	336.49	168.295	1.10789	0.0111453	nucleotide binding protein 2 [Source:MGI Symbol;Acc:MGI:1347072]
ENSMUSG00000067870	Rpl31-ps8	383.215	222.093	1.107	0.00620043	ribosomal protein L31, pseudogene 8 [Source:MGI Symbol;Acc:MGI:3647726]
ENSMUSG00000063882	Uqcrh	189.536	105.411	1.10689	0.0100634	ubiquinol-cytochrome c reductase hinge protein [Source:MGI Symbol;Acc:MGI:1913826]
ENSMUSG00000004591	Pkn2	105.318	160.67	-1.10641	0.0200531	protein kinase N2 [Source:MGI Symbol;Acc:MGI:109211]
ENSMUSG00000018846	Pank3	231.089	398.104	-1.10606	0.00925793	pantothenate kinase 3 [Source:MGI Symbol;Acc:MGI:2387464]
ENSMUSG00000030335	Mrpl51	176.845	95.067	1.10579	0.0123089	mitochondrial ribosomal protein L51 [Source:MGI Symbol;Acc:MGI:1913743]
ENSMUSG00000070522	Gm6505	109.481	62.9064	1.10565	0.0239398	predicted pseudogene 6505 [Source:MGI Symbol;Acc:MGI:3648080]
ENSMUSG00000005312	Ubqln1	261.46	404.765	-1.10512	0.0258538	ubiquilin 1 [Source:MGI Symbol;Acc:MGI:1860276]
ENSMUSG00000016018	Skiv2l2	139.947	260.473	-1.10454	0.0173018	superkiller viralicidic activity 2-like 2 (S. cerevisiae) [Source:MGI Symbol;Acc:MGI:1919448]
ENSMUSG00000028330	Ncbp1	139.549	264.251	-1.10388	0.0156969	nuclear cap binding protein subunit 1 [Source:MGI Symbol;Acc:MGI:1891840]
ENSMUSG00000022024	Sugt1	2016.33	1149.05	1.10322	0.0123727	SGT1, suppressor of G2 allele of SKP1 (S. cerevisiae) [Source:MGI Symbol;Acc:MGI:1915205]
ENSMUSG00000069114	Zbtb10	79.9029	167.637	-1.10209	0.0330063	zinc finger and BTB domain containing 10 [Source:MGI Symbol;Acc:MGI:2139883]
ENSMUSG00000031590	Frg1	106.467	58.3734	1.10139	0.0279566	FSHD region gene 1 [Source:MGI Symbol;Acc:MGI:893597]
ENSMUSG00000032301	Psma4	442.197	230.198	1.10058	0.00534816	proteasome (prosome, macropain) subunit, alpha type 4 [Source:MGI Symbol;Acc:MGI:1347060]
ENSMUSG00000028899	Taf12	81.6126	46.6333	1.09959	0.042865	TAF12 RNA polymerase II, TATA box binding protein (TBP)-associated factor [Source:MGI Symbol;Acc:MGI:1913714]
ENSMUSG00000060288	Ppih	154.778	83.7887	1.09951	0.0247046	peptidyl prolyl isomerase H [Source:MGI Symbol;Acc:MGI:106499]
ENSMUSG00000073702	Rpl31	243.684	140.499	1.09949	0.00749168	ribosomal protein L31 [Source:MGI Symbol;Acc:MGI:2149632]
ENSMUSG00000007411	Mark3	99.7173	155.113	-1.09876	0.0274766	MAP/microtubule affinity-regulating kinase 3 [Source:MGI Symbol;Acc:MGI:1341865]
ENSMUSG00000071226	Cecr2	195.91	362.231	-1.09821	0.0230801	cat eye syndrome chromosome region, candidate 2 [Source:MGI Symbol;Acc:MGI:1923799]
ENSMUSG00000032513	Gorasp1	49.4242	105.372	-1.09798	0.0474696	golgi reassembly stacking protein 1 [Source:MGI Symbol;Acc:MGI:1921748]
ENSMUSG00000030872	Gga2	155.985	210.779	-1.09726	0.0192439	golgi associated, gamma adaptin ear containing, ARF binding protein 2 [Source:MGI Symbol;Acc:MGI:1921355]
ENSMUSG00000052752	Traf7	51.5602	90.6683	-1.09722	0.0484496	TNF receptor-associated factor 7 [Source:MGI Symbol;Acc:MGI:3042141]
ENSMUSG00000020063	Sirt1	129.948	219.531	-1.09639	0.0149943	sirtuin 1 [Source:MGI Symbol;Acc:MGI:2135607]
ENSMUSG00000083061	Gm12191	374.038	212.721	1.09633	0.0075071	predicted gene 12191 [Source:MGI Symbol;Acc:MGI:3651293]
ENSMUSG00000091625	Lsm5	154.502	85.0925	1.09626	0.0178362	LSM5 homolog, U6 small nuclear RNA associated (S. cerevisiae) [Source:MGI Symbol;Acc:MGI:1913623]
ENSMUSG00000035960	Apex1	395.742	217.716	1.09572	0.00792719	apurinic/apyrimidinic endonuclease 1 [Source:MGI Symbol;Acc:MGI:88042]
ENSMUSG00000052681	Rap1b	291.152	157.217	1.09563	0.0101489	RAS related protein 1b [Source:MGI Symbol;Acc:MGI:894315]
ENSMUSG00000085811	Cep112os2	106.892	44.3317	1.09562	0.0412432	centrosomal protein 112, opposite strand 2 [Source:MGI Symbol;Acc:MGI:3649867]
ENSMUSG00000030663	1110004F10Rik	178.027	91.5151	1.09444	0.0139309	RIKEN cDNA 1110004F10 gene [Source:MGI Symbol;Acc:MGI:1929274]
ENSMUSG00000029475	Kdm2b	108.513	201.241	-1.09314	0.0174447	lysine (K)-specific demethylase 2B [Source:MGI Symbol;Acc:MGI:1354737]
ENSMUSG00000044894	Uqcrq	292.804	154.644	1.09202	0.00894284	ubiquinol-cytochrome c reductase, complex III subunit VII [Source:MGI Symbol;Acc:MGI:107807]
ENSMUSG00000026111	Unc50	120.502	58.8879	1.09169	0.0290621	unc-50 homolog (C. elegans) [Source:MGI Symbol;Acc:MGI:1914637]
ENSMUSG00000020163	Uqcr11	167.973	88.9311	1.09158	0.0254668	ubiquinol-cytochrome c reductase, complex III subunit XI [Source:MGI Symbol;Acc:MGI:1913844]
ENSMUSG00000019373	Cops3	138.659	74.0952	1.09158	0.022359	COP9 (constitutive photomorphogenic) homolog, subunit 3 (Arabidopsis thaliana) [Source:MGI Symbol;Acc:MGI:1349409]
ENSMUSG00000021131	Erh	575.473	317.614	1.09135	0.00568754	enhancer of rudimentary homolog (Drosophila) [Source:MGI Symbol;Acc:MGI:108089]
ENSMUSG00000035242	Oaz1	1217.67	692.011	1.08948	0.0135549	ornithine decarboxylase antizyme 1 [Source:MGI Symbol;Acc:MGI:109433]
ENSMUSG00000050608	Minos1	166.108	90.0178	1.0893	0.0227701	mitochondrial inner membrane organizing system 1 [Source:MGI Symbol;Acc:MGI:1913628]
ENSMUSG00000031065	Cdk16	156.487	260.355	-1.08879	0.0396674	cyclin-dependent kinase 16 [Source:MGI Symbol;Acc:MGI:97516]
ENSMUSG00000004268	Emg1	277.87	162.647	1.08832	0.00958422	EMG1 nucleolar protein homolog (S. cerevisiae) [Source:MGI Symbol;Acc:MGI:1315195]
ENSMUSG00000030512	Snrpa1	233.032	137.342	1.08795	0.00837972	small nuclear ribonucleoprotein polypeptide A' [Source:MGI Symbol;Acc:MGI:1916231]
ENSMUSG00000022774	Ncbp2	212.353	127.703	1.08737	0.0099914	nuclear cap binding protein subunit 2 [Source:MGI Symbol;Acc:MGI:1915342]
ENSMUSG00000028703	Lrrc41	59.9856	81.1381	-1.08731	0.0494214	leucine rich repeat containing 41 [Source:MGI Symbol;Acc:MGI:2441984]
ENSMUSG00000039209	Rpl39l	166.084	99.7658	1.08724	0.0230307	ribosomal protein L39-like [Source:MGI Symbol;Acc:MGI:1915422]
ENSMUSG00000060121	Gemin2	138.818	81.2008	1.08714	0.0235865	gem (nuclear organelle) associated protein 2 [Source:MGI Symbol;Acc:MGI:1913853]
ENSMUSG00000047215	Rpl9	1120.73	635.284	1.08649	0.0101842	ribosomal protein L9 [Source:MGI Symbol;Acc:MGI:1298373]
ENSMUSG00000037278	Tmem97	383.98	214.057	1.08643	0.00525823	transmembrane protein 97 [Source:MGI Symbol;Acc:MGI:1916321]
ENSMUSG00000030342	Cd9	1547.16	856.474	1.08387	0.0131829	CD9 antigen [Source:MGI Symbol;Acc:MGI:88348]
[truncated: 311 more rows]
