# Supplementary material for: Transitions in cell potency during early mouse development are driven by Notch
Source: eLife journal article supplement (doi:10.7554/elife.42930), 2019-04-08
Supplement: supp [file elife-42930-supp-v1.zip › elife_poa_e42930_Figure_5_source_data_2.xlsx]

## Sheet: DEG_vs_RBPJ_10000_rbpj_vs_ATACS
Chromosome	ensembl_gene_id	mgi_symbol	logFC
chr5	ENSMUSG00000093445	Lrch4	-12.876
chr14	ENSMUSG00000075592	Nynrin	-11.0325
chr16	ENSMUSG00000014039	Prdm15	-10.5595
chr13	ENSMUSG00000058883	Zfp708	-10.4676
chr13	ENSMUSG00000033715	Akr1c14	-10.388
chr2	ENSMUSG00000038718	Pbx3	-10.1522
chr2	ENSMUSG00000059013	Sh2d3c	-9.4738
chr4	ENSMUSG00000041000	Trim62	-9.28136
chr1	ENSMUSG00000079429	Mroh2a	-8.9744
chr14	ENSMUSG00000045691	Thtpa	-8.93131
chr19	ENSMUSG00000025231	Sufu	-8.84863
chr5	ENSMUSG00000029420	Rimbp2	-8.3775
chr10	ENSMUSG00000019848	Popdc3	-8.28179
chrX	ENSMUSG00000025265	Fgd1	-6.2003
chr10	ENSMUSG00000043822	Adamtsl5	-5.19939
chr15	ENSMUSG00000033128	Gga1	-4.29171
chr13	ENSMUSG00000021706	Zfyve16	-4.28683
chr8	ENSMUSG00000053693	Mast1	-4.26484
chr1	ENSMUSG00000026608	Kctd3	-4.19806
chr10	ENSMUSG00000019979	Apaf1	-3.88023
chr7	ENSMUSG00000052512	Nav2	-3.78348
chr16	ENSMUSG00000005958	Ephb3	-3.42841
chr2	ENSMUSG00000009621	Vav2	-3.34168
chr14	ENSMUSG00000025558	Dock9	-3.06462
chr7	ENSMUSG00000030849	Fgfr2	-3.0349
chr11	ENSMUSG00000020715	Ern1	-3.03165
chr1	ENSMUSG00000045216	Hs6st1	-3.02734
chr4	ENSMUSG00000070583	Fv1	-2.92522
chr3	ENSMUSG00000036885	Arhgef26	-2.89954
chr19	ENSMUSG00000055491	Pprc1	-2.8972
chr1	ENSMUSG00000026483	Fam129a	-2.89394
chr6	ENSMUSG00000001632	Brpf1	-2.89144
chr18	ENSMUSG00000048799	Cep120	-2.86478
chr12	ENSMUSG00000021182	Ccdc88c	-2.86379
chr6	ENSMUSG00000002413	Braf	-2.85303
chr2	ENSMUSG00000015619	Gata3	-2.8402
chr2	ENSMUSG00000026655	Fam107b	-2.83542
chr9	ENSMUSG00000041064	Pif1	-2.81775
chr7	ENSMUSG00000025507	Pidd1	-2.81306
chr1	ENSMUSG00000070939	Tgfbrap1	-2.81251
chr11	ENSMUSG00000078676	Casc3	-2.77695
chr4	ENSMUSG00000040715	Rsc1a1	-2.77435
chr1	ENSMUSG00000041040	Fam117b	-2.76078
chr3	ENSMUSG00000027784	Ppm1l	-2.73541
chr7	ENSMUSG00000030660	Pik3c2a	-2.72859
chr15	ENSMUSG00000036529	Sbf1	-2.70792
chr10	ENSMUSG00000020114	Cand1	-2.70602
chr8	ENSMUSG00000014859	E2f4	-2.69101
chr8	ENSMUSG00000036550	Cnot1	-2.68326
chr7	ENSMUSG00000066571	4931406P16Rik	-2.68037
chr10	ENSMUSG00000038214	Bend3	-2.67706
chr9	ENSMUSG00000032086	Bace1	-2.62413
chr13	ENSMUSG00000021360	Gcnt2	-2.6078
chr14	ENSMUSG00000021745	Ptprg	-2.57187
chr2	ENSMUSG00000027678	Ncoa3	-2.55126
chr11	ENSMUSG00000017405	Nek8	-2.54893
chr17	ENSMUSG00000024077	Strn	-2.54087
chr4	ENSMUSG00000046312	AI464131	-2.53953
chr5	ENSMUSG00000023079	Gtf2ird1	-2.52457
chr11	ENSMUSG00000020536	Llgl1	-2.51801
chr7	ENSMUSG00000005610	Eif4g2	-2.47886
chr12	ENSMUSG00000060716	Plekhh1	-2.47621
chr19	ENSMUSG00000024827	Gldc	-2.47165
chr16	ENSMUSG00000022807	Osbpl11	-2.44094
chr12	ENSMUSG00000052609	Plekhg3	-2.43425
chr14	ENSMUSG00000025278	Flnb	-2.42475
chr17	ENSMUSG00000023927	Satb1	-2.4119
chr4	ENSMUSG00000029009	Mthfr	-2.40962
chr17	ENSMUSG00000097971	Gm26917	-2.4052
chr10	ENSMUSG00000019866	Aim1	-2.39562
chr11	ENSMUSG00000020905	Usp43	-2.39555
chr19	ENSMUSG00000069833	Ahnak	-2.39273
chr13	ENSMUSG00000039087	Rreb1	-2.35447
chr9	ENSMUSG00000032536	Trak1	-2.3495
chr12	ENSMUSG00000034258	Mfsd7c	-2.3447
chr18	ENSMUSG00000039840	Epg5	-2.29778
chrX	ENSMUSG00000001173	Ocrl	-2.27798
chr7	ENSMUSG00000057342	Sphk2	-2.272
chr19	ENSMUSG00000024908	Ppp6r3	-2.27118
chr6	ENSMUSG00000030213	Atf7ip	-2.26889
chr8	ENSMUSG00000031951	Tmem231	-2.25774
chr11	ENSMUSG00000034714	Ttyh2	-2.25121
chr18	ENSMUSG00000054321	Taf4b	-2.23515
chr5	ENSMUSG00000018604	Tbx3	-2.22531
chr5	ENSMUSG00000039191	Rbpj	-2.21856
chr8	ENSMUSG00000031902	Nfatc3	-2.21779
chr6	ENSMUSG00000043131	Mob1a	-2.20409
chr8	ENSMUSG00000031563	Wwc2	-2.19013
chr17	ENSMUSG00000015461	Atf6b	-2.18879
chr4	ENSMUSG00000028412	Slc44a1	-2.18863
chr16	ENSMUSG00000045983	Eif4g1	-2.16637
chr4	ENSMUSG00000028381	Ugcg	-2.13576
chr15	ENSMUSG00000051786	Tubgcp6	-2.118
chr2	ENSMUSG00000038844	Kif16b	-2.11591
chr10	ENSMUSG00000038587	Akap12	-2.09613
chr7	ENSMUSG00000051527	Usp29	-2.09402
chr19	ENSMUSG00000025199	Chuk	-2.09307
chr16	ENSMUSG00000022914	Brwd1	-2.07535
chr9	ENSMUSG00000032120	C2cd2l	-2.07272
chr13	ENSMUSG00000005397	Nid1	-2.07249
chr14	ENSMUSG00000047098	Rnf31	-2.05445
chr5	ENSMUSG00000000149	Gna12	-2.05435
chr19	ENSMUSG00000024735	Prpf19	-2.04778
chr5	ENSMUSG00000029188	Slc34a2	-2.03901
chr8	ENSMUSG00000031788	Kifc3	-2.03194
chr13	ENSMUSG00000021553	Slc28a3	-2.00848
chr1	ENSMUSG00000010290	AI597479	-2.00693
chr17	ENSMUSG00000002307	Daxx	-1.99873
chr5	ENSMUSG00000029646	Cdx2	-1.99527
chr17	ENSMUSG00000037326	Capn15	-1.99188
chr19	ENSMUSG00000067889	Sptbn2	-1.97372
chr10	ENSMUSG00000049764	Zfp280b	-1.95227
chr13	ENSMUSG00000038518	Jarid2	-1.95033
chr16	ENSMUSG00000022897	Dyrk1a	-1.94272
chr19	ENSMUSG00000090673	Gm340	-1.94255
chr2	ENSMUSG00000027194	Ttc17	-1.93632
chr5	ENSMUSG00000054280	Prr14l	-1.92579
chr8	ENSMUSG00000031974	Abcb10	-1.92328
chr8	ENSMUSG00000025812	Pard3	-1.91589
chr9	ENSMUSG00000032612	Usp4	-1.91487
chr2	ENSMUSG00000036617	Etl4	-1.89506
chr15	ENSMUSG00000048154	Kmt2d	-1.89386
chr1	ENSMUSG00000066877	Nck2	-1.89108
chr17	ENSMUSG00000024335	Brd2	-1.88527
chr18	ENSMUSG00000033382	Trappc8	-1.88143
chr4	ENSMUSG00000029020	Mfn2	-1.87837
chr18	ENSMUSG00000024597	Slc12a2	-1.87089
chr8	ENSMUSG00000033596	Rfwd3	-1.86659
chr15	ENSMUSG00000036698	Ago.2	-1.86037
chr3	ENSMUSG00000044167	Foxo1	-1.85677
chr18	ENSMUSG00000024590	Lmnb1	-1.85648
chr11	ENSMUSG00000004040	Stat3	-1.85334
chr10	ENSMUSG00000020329	Polrmt	-1.84742
chr15	ENSMUSG00000022150	Dab2	-1.84028
chr4	ENSMUSG00000078515	Ddi2	-1.8332
chr8	ENSMUSG00000031835	Mbtps1	-1.83073
chr11	ENSMUSG00000002812	Flii	-1.82763
chr17	ENSMUSG00000023830	Igf2r	-1.82345
chr3	ENSMUSG00000056476	Med12l	-1.82118
chr3	ENSMUSG00000054942	Fam73a	-1.82029
chr3	ENSMUSG00000025437	Usp33	-1.81678
chr13	ENSMUSG00000032727	Mier3	-1.78247
chr11	ENSMUSG00000017210	Med24	-1.78211
chr9	ENSMUSG00000032437	Stt3b	-1.77412
chr12	ENSMUSG00000018707	Dync1h1	-1.77314
chr8	ENSMUSG00000084128	Esrp2	-1.76896
chr15	ENSMUSG00000001280	Sp1	-1.75482
chr6	ENSMUSG00000068329	Htra2	-1.747
chr19	ENSMUSG00000024642	Tle4	-1.74135
chr14	ENSMUSG00000023243	Kcnk5	-1.73831
chr2	ENSMUSG00000038990	Cables2	-1.73725
chr8	ENSMUSG00000036779	Papd5	-1.73613
chr12	ENSMUSG00000033530	Ttc7b	-1.7267
chr7	ENSMUSG00000039187	Fanci	-1.71218
chr10	ENSMUSG00000019820	Utrn	-1.71037
chr11	ENSMUSG00000019302	Atp6v0a1	-1.70343
chr12	ENSMUSG00000021133	4933426M11Rik	-1.70062
chr1	ENSMUSG00000042207	Kdm5b	-1.69487
chr4	ENSMUSG00000042608	Stk40	-1.69472
chr18	ENSMUSG00000073542	Cep76	-1.68629
chr15	ENSMUSG00000022350	E430025E21Rik	-1.68573
chr8	ENSMUSG00000031834	Pik3r2	-1.67467
chr1	ENSMUSG00000044783	Hjurp	-1.65789
chr11	ENSMUSG00000020271	Fbxw11	-1.64676
chr9	ENSMUSG00000004099	Dnmt1	-1.63595
chr4	ENSMUSG00000028580	Pum1	-1.63474
chr9	ENSMUSG00000032293	Ireb2	-1.57893
chr16	ENSMUSG00000061751	Kalrn	-1.57754
chr5	ENSMUSG00000029407	Uso1	-1.57485
chr16	ENSMUSG00000022601	Zbtb11	-1.57455
chr18	ENSMUSG00000041915	Ammecr1l	-1.57208
chr4	ENSMUSG00000066148	Prpf4	-1.55682
chr5	ENSMUSG00000029722	Agfg2	-1.54408
chr16	ENSMUSG00000022685	Parn	-1.54188
chr12	ENSMUSG00000034168	Irf2bpl	-1.5413
chr19	ENSMUSG00000024812	Tjp2	-1.53961
chr17	ENSMUSG00000024045	Akap8	-1.51712
chr6	ENSMUSG00000024104	Fam21	-1.50558
chr11	ENSMUSG00000040620	Dhx33	-1.48265
chr5	ENSMUSG00000029505	Ep400	-1.47586
chr10	ENSMUSG00000040054	Baz2a	-1.47519
chr17	ENSMUSG00000069729	Arid1b	-1.43426
chr1	ENSMUSG00000037470	Uggt1	-1.41688
chr11	ENSMUSG00000037275	Gemin5	-1.41499
chr19	ENSMUSG00000025027	Xpnpep1	-1.41442
chr5	ENSMUSG00000038056	Kmt2c	-1.41177
chr10	ENSMUSG00000020038	Cry1	-1.39997
chr16	ENSMUSG00000022517	Mgrn1	-1.3869
chr12	ENSMUSG00000020661	Dnmt3a	-1.37689
chr8	ENSMUSG00000031960	Aars	-1.37444
chr8	ENSMUSG00000003316	Glg1	-1.37363
chr12	ENSMUSG00000017843	Ppp2r5c	-1.36894
chr16	ENSMUSG00000022682	Rrn3	-1.36544
chr14	ENSMUSG00000021840	Mapk1ip1l	-1.36519
chr19	ENSMUSG00000044026	Slc35g1	-1.35594
chr4	ENSMUSG00000040738	Ints8	-1.34531
chr19	ENSMUSG00000056999	Ide	-1.3383
chr12	ENSMUSG00000042628	Zfyve1	-1.33691
chr5	ENSMUSG00000029635	Cdk8	-1.33381
chr2	ENSMUSG00000043535	Setx	-1.3146
chr7	ENSMUSG00000002981	Clptm1	-1.314
chr1	ENSMUSG00000023150	Ivns1abp	-1.28527
chr8	ENSMUSG00000031488	Rab11fip1	-1.28398
chr5	ENSMUSG00000051391	Ywhag	-1.27104
chr5	ENSMUSG00000053581	Zfand2a	-1.2628
chr6	ENSMUSG00000029833	Trim24	-1.25391
chr14	ENSMUSG00000022178	Ajuba	-1.25134
chr2	ENSMUSG00000039050	Osbpl2	-1.25019
chr11	ENSMUSG00000020458	Rtn4	-1.23412
chr5	ENSMUSG00000042508	Dmtf1	-1.23301
chr15	ENSMUSG00000022360	Atad2	-1.23293
chr3	ENSMUSG00000039068	Zzz3	-1.22948
chr11	ENSMUSG00000038366	Lasp1	-1.20521
chr11	ENSMUSG00000059474	Mbtd1	-1.18926
chr16	ENSMUSG00000022710	Usp7	-1.18575
chr6	ENSMUSG00000039159	Ube2h	-1.18478
chr11	ENSMUSG00000017386	Traf4	-1.17089
chr12	ENSMUSG00000055884	Fancm	-1.16665
chr10	ENSMUSG00000050953	Gja1	-1.16091
chr2	ENSMUSG00000027429	Sec23b	-1.15517
chr8	ENSMUSG00000031823	Zdhhc7	-1.15045
chr5	ENSMUSG00000029169	Dhx15	-1.12464
chr8	ENSMUSG00000038697	Taf5l	-1.11063
chr3	ENSMUSG00000069114	Zbtb10	-1.10209
chr5	ENSMUSG00000006641	Slc5a6	-1.07544
chr4	ENSMUSG00000043252	Tmem64	-1.04605
chr8	ENSMUSG00000031987	Egln1	-1.03956
chr9	ENSMUSG00000032582	Rbm6	-1.01019
chr5	ENSMUSG00000029142	Mrpl33	1.00041
chr7	ENSMUSG00000030652	Coq7	1.02086
chr12	ENSMUSG00000054302	Eapp	1.02516
chr1	ENSMUSG00000060743	H3f3a	1.02991
chr2	ENSMUSG00000026914	Psmd14	1.03425
chr9	ENSMUSG00000001348	Acp5	1.05166
chr17	ENSMUSG00000024436	Mrps18b	1.05549
chr7	ENSMUSG00000003429	Rps11	1.06214
chr8	ENSMUSG00000031950	Gabarapl2	1.08198
chr6	ENSMUSG00000004268	Emg1	1.08832
chr1	ENSMUSG00000026021	Sumo1	1.13036
chr11	ENSMUSG00000084034	Gm12617	1.14445
chr18	ENSMUSG00000051316	Taf7	1.16032
chr8	ENSMUSG00000045128	Rpl18a	1.17604
chr1	ENSMUSG00000026034	Clk1	1.17925
chr9	ENSMUSG00000025794	Rpl14	1.17999
chr7	ENSMUSG00000008036	Ap2s1	1.18006
chr3	ENSMUSG00000037152	Ndufc1	1.18081
chr16	ENSMUSG00000014301	Pam16	1.19533
chr10	ENSMUSG00000020022	Ndufa12	1.20289
chr10	ENSMUSG00000020180	Snrpd3	1.21508
chr17	ENSMUSG00000002660	Clpp	1.22
chr8	ENSMUSG00000031812	Map1lc3b	1.2214
chr17	ENSMUSG00000024099	Ndufv2	1.22581
chr8	ENSMUSG00000031762	Mt2	1.22958
chr14	ENSMUSG00000067995	Gtf2f2	1.24988
chr16	ENSMUSG00000039680	Mrps6	1.26244
chr4	ENSMUSG00000029007	Agtrap	1.26245
chr19	ENSMUSG00000071662	Polr2g	1.27571
chr10	ENSMUSG00000019795	Pcmt1	1.2816
chr4	ENSMUSG00000078713	Tomm5	1.30014
chr15	ENSMUSG00000054196	Cthrc1	1.30326
chr11	ENSMUSG00000037601	Nme1	1.30425
chr2	ENSMUSG00000027454	Gins1	1.3082
chr12	ENSMUSG00000096942	Rps19-ps6	1.31748
chr10	ENSMUSG00000020225	Tmbim4	1.32411
chr16	ENSMUSG00000075229	Ccdc58	1.35465
chr11	ENSMUSG00000091228	Gm20390	1.38341
chr10	ENSMUSG00000090247	Bloc1s1	1.40208
chr8	ENSMUSG00000025809	Itgb1	1.46866
chr12	ENSMUSG00000062352	Itgb1bp1	1.46866
chr10	ENSMUSG00000040034	Nup43	1.51503
chr19	ENSMUSG00000025068	Gsto1	1.6826
chr10	ENSMUSG00000075558	Gm17151	1.68361
chr11	ENSMUSG00000009076	Zmat5	1.6917
chr4	ENSMUSG00000028393	Alad	1.70791
chr3	ENSMUSG00000039887	Alg14	1.71054
chr7	ENSMUSG00000064254	Ethe1	1.90196
chr17	ENSMUSG00000036775	Decr2	2.01712
chr11	ENSMUSG00000018449	Rpain	2.11725
chr11	ENSMUSG00000083844	2210015D19Rik	2.49725
chr13	ENSMUSG00000034334	Fam151b	4.77629
chr11	ENSMUSG00000082658	Fau-ps2	5.32395
chr7	ENSMUSG00000098496	1810026B05Rik	5.97634
