# Supplementary figures and images for: Transitions in cell potency during early mouse development are driven by Notch
Source: eLife journal article supplement (doi:10.7554/elife.42930), 2019-04-08

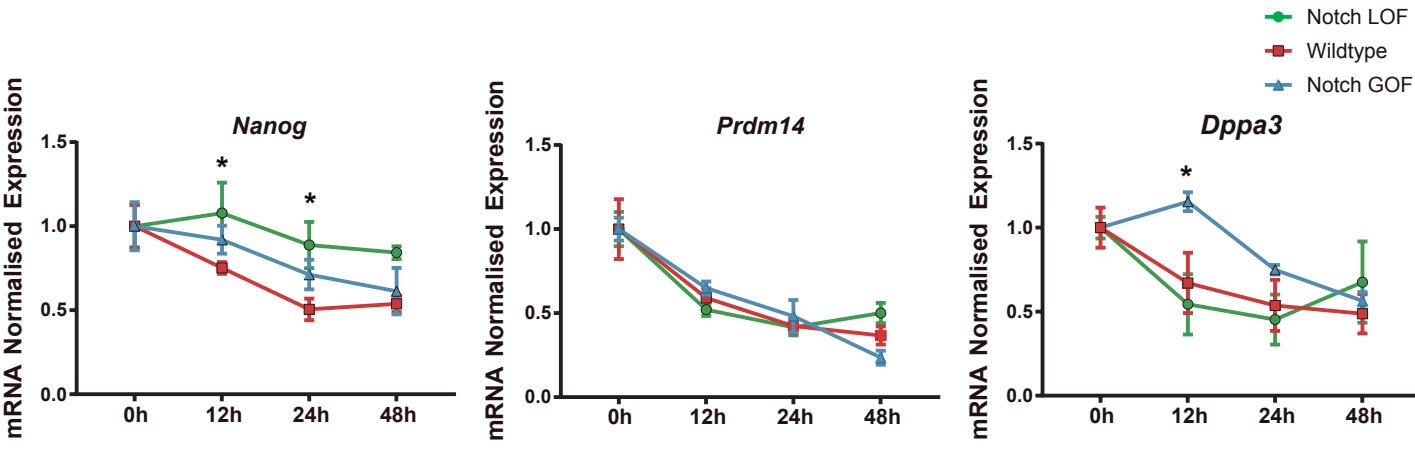

Supplement: supp [file elife-42930-supp-v1.zip › elife_poa_e42930_Figure_6_figure_supplement_3.pdf]

A

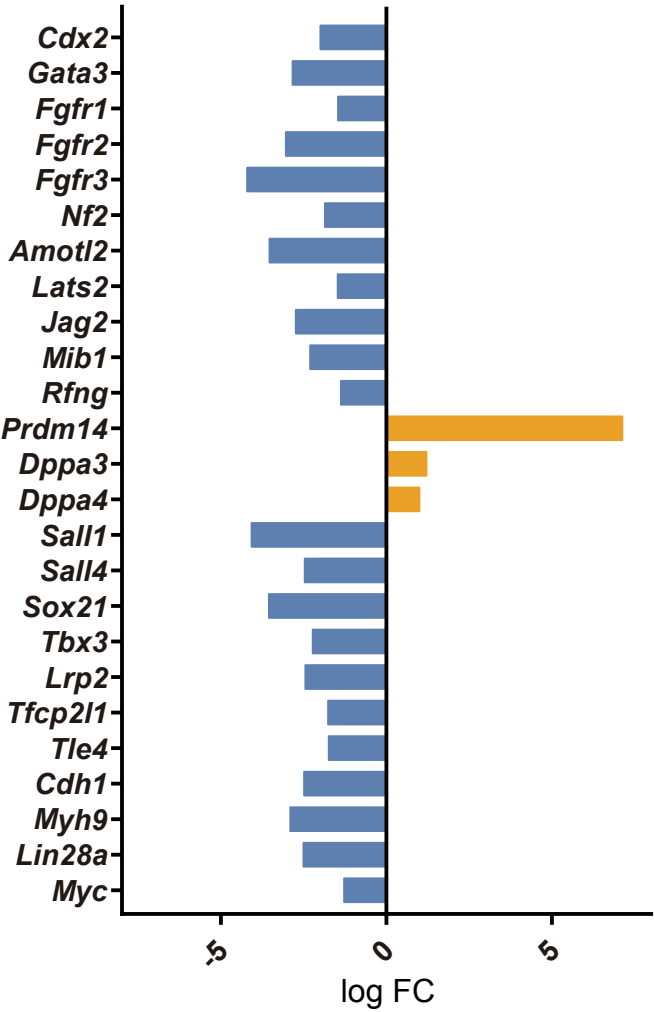

B

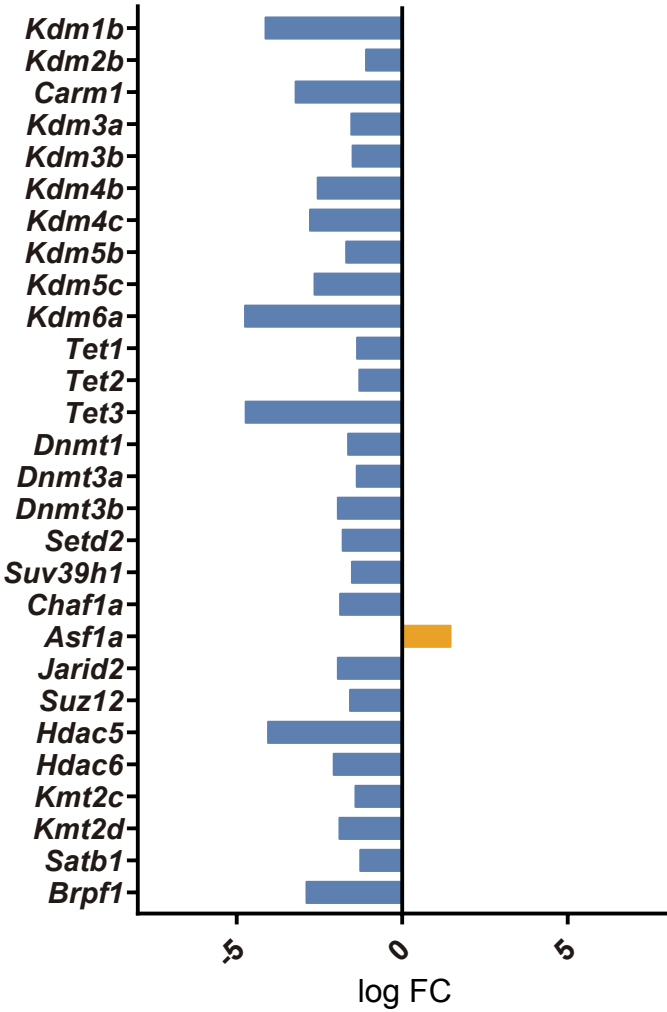

Supplement: supp [file elife-42930-supp-v1.zip › elife_poa_e42930_Figure_5_figure_supplement_1.pdf]

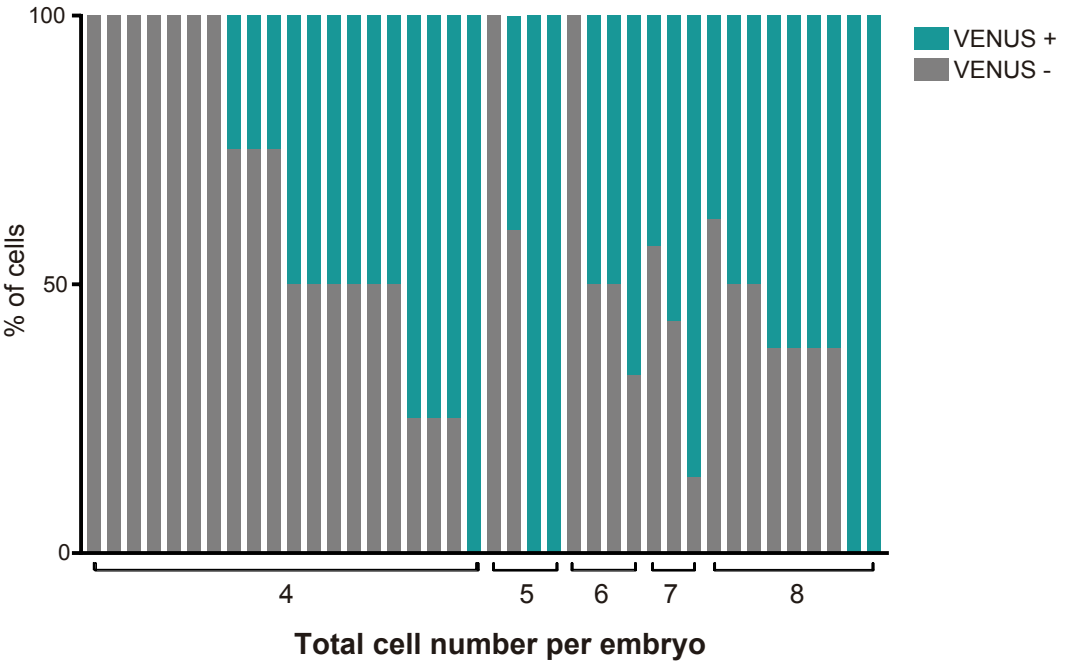

Supplement: supp [file elife-42930-supp-v1.zip › elife_poa_e42930_Figure_3_figure_supplement_1.pdf]

Menchero Figure 6-figure supplement 2

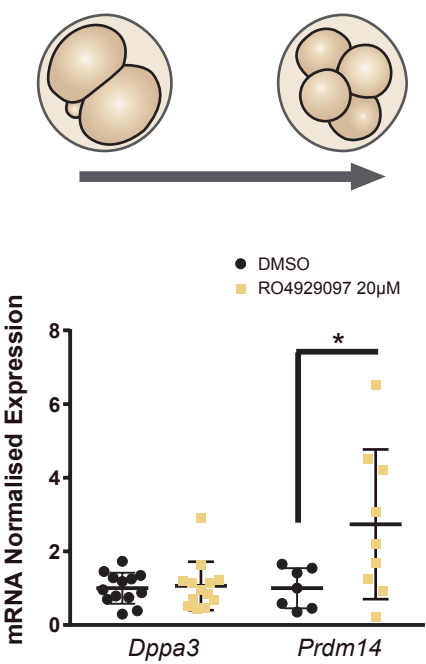

Supplement: supp [file elife-42930-supp-v1.zip › elife_poa_e42930_Figure_6_figure_supplement_2.pdf]

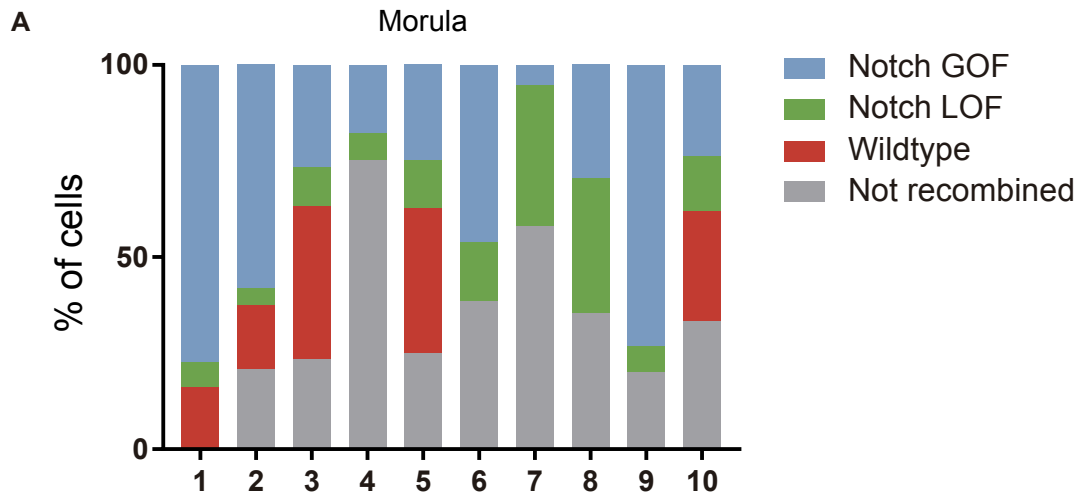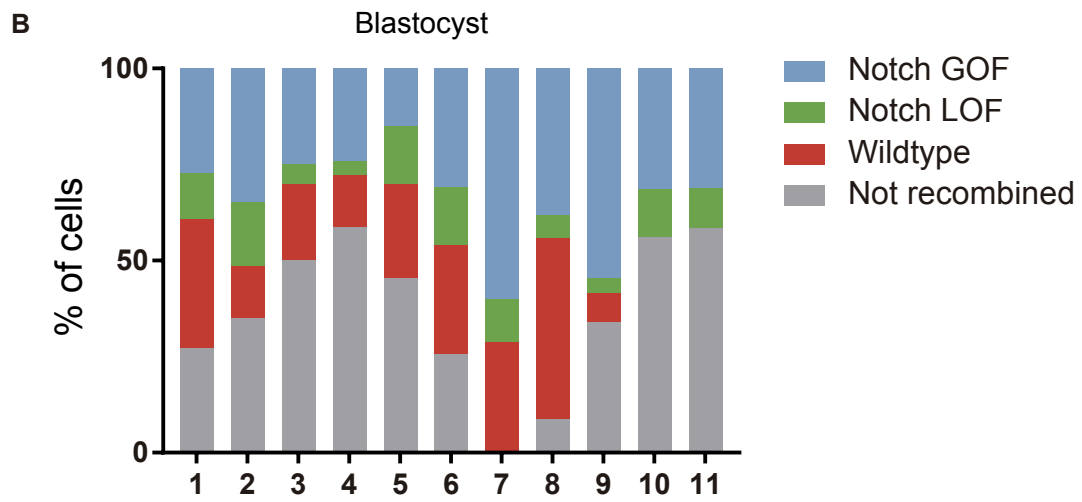

Supplement: supp [file elife-42930-supp-v1.zip › elife_poa_e42930_Figure_4_figure_supplement_2.pdf]

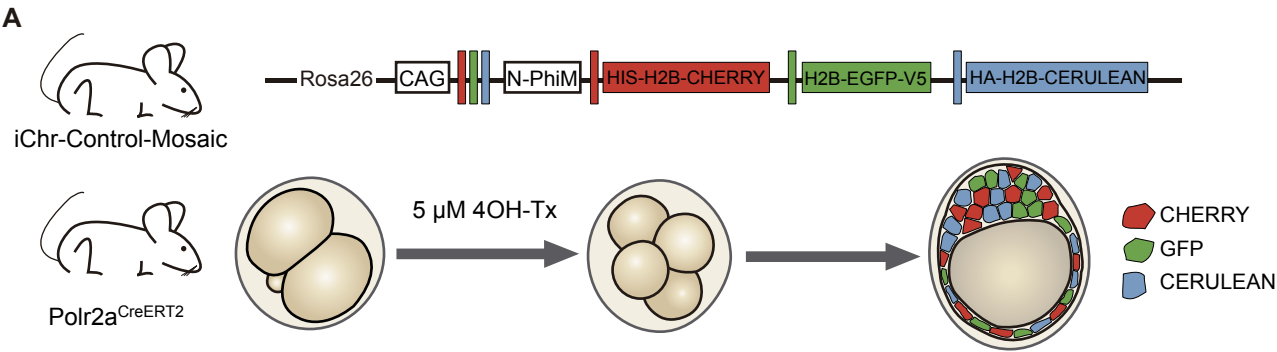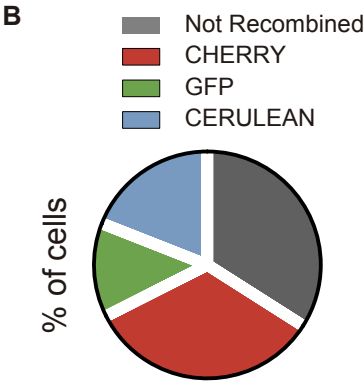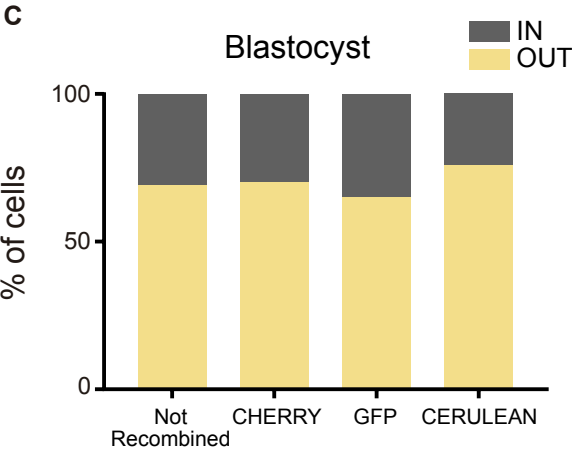

Supplement: supp [file elife-42930-supp-v1.zip › elife_poa_e42930_Figure_4_figure_supplement_3.pdf]

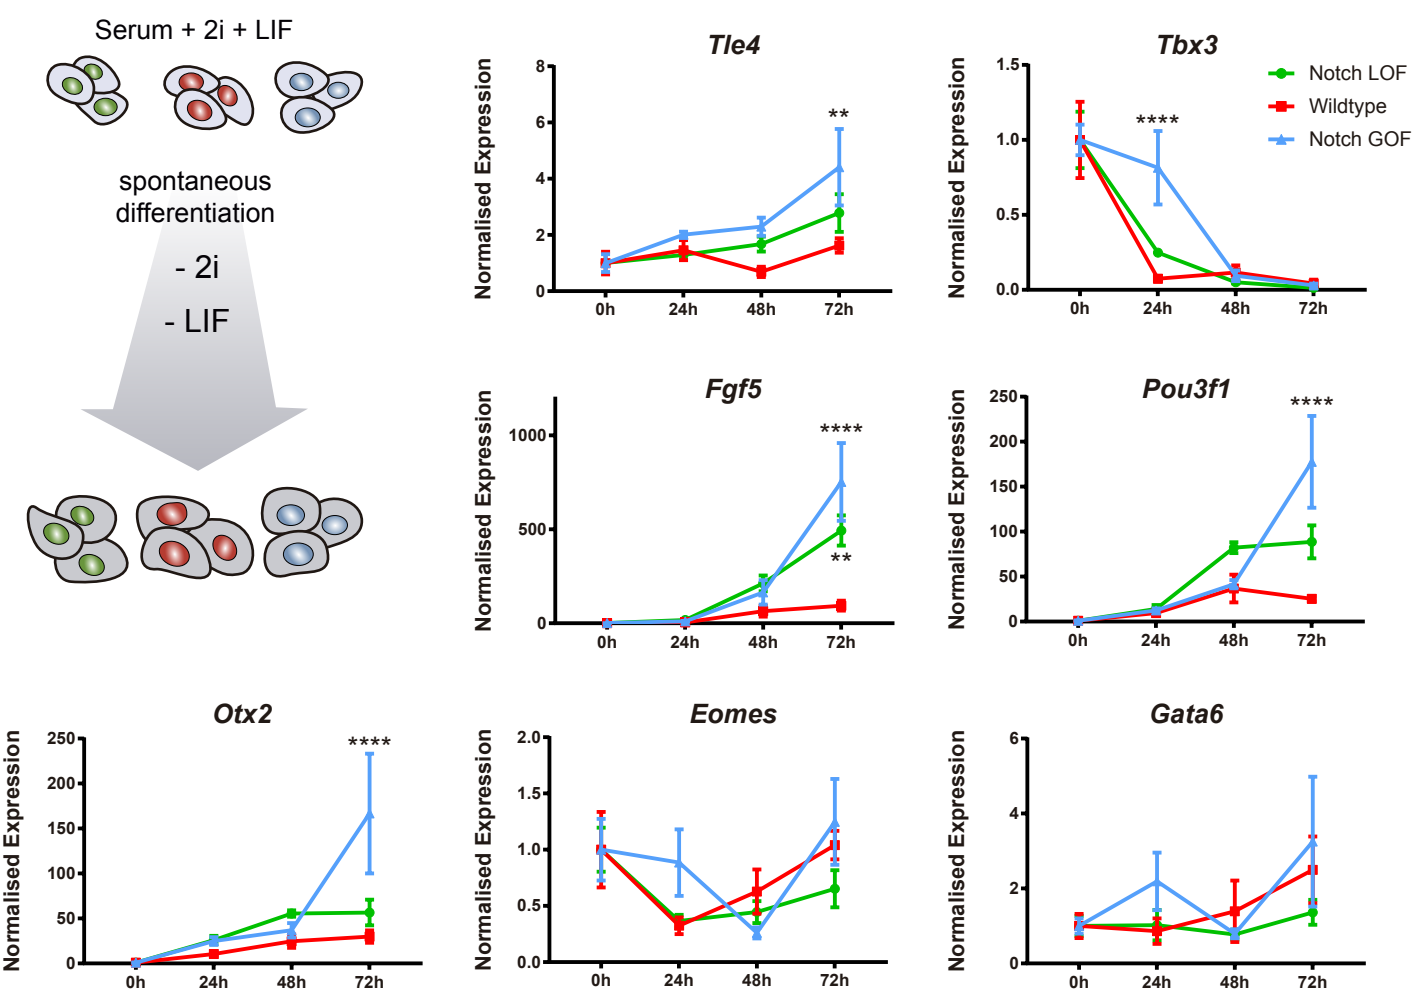

Supplement: supp [file elife-42930-supp-v1.zip › elife_poa_e42930_Figure_6_figure_supplement_4.pdf]

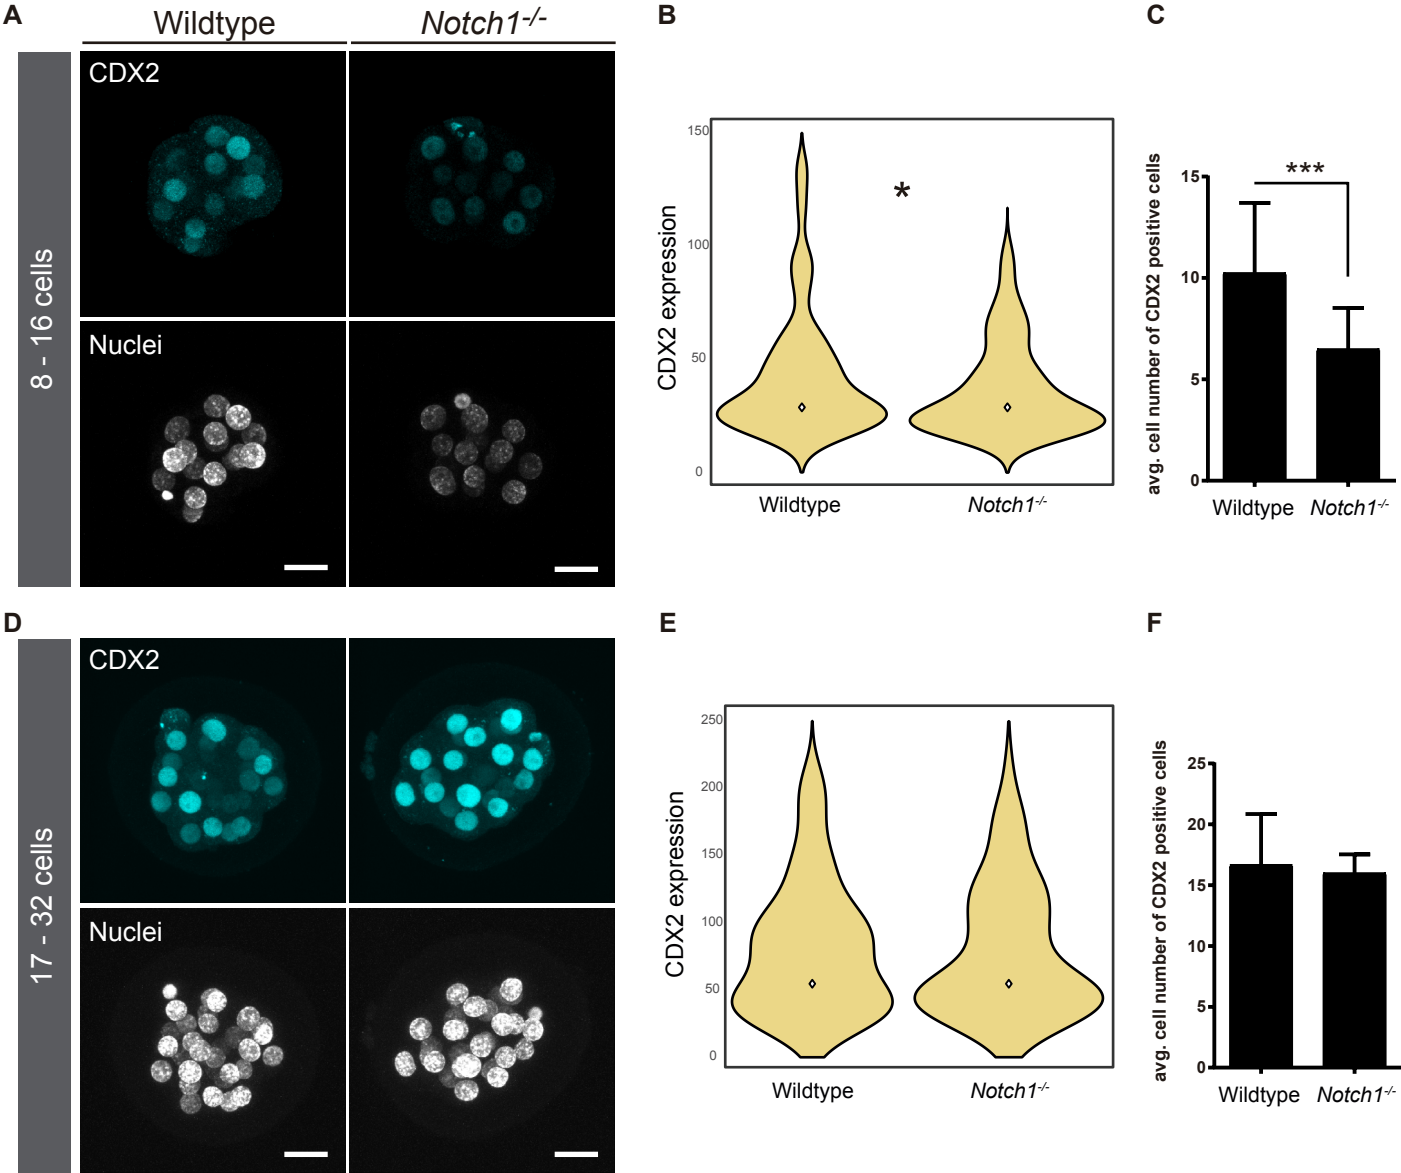

Supplement: supp [file elife-42930-supp-v1.zip › elife_poa_e42930_Figure_2_figure_supplement_2.pdf]

A

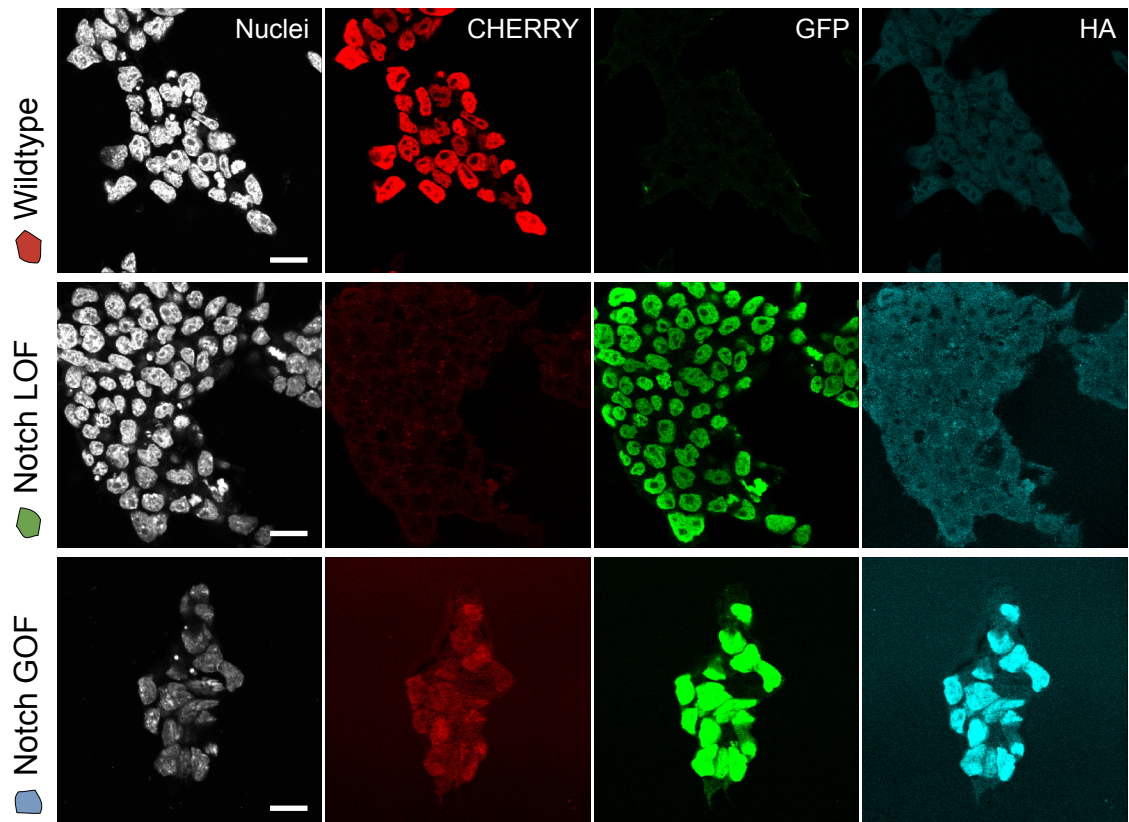

B

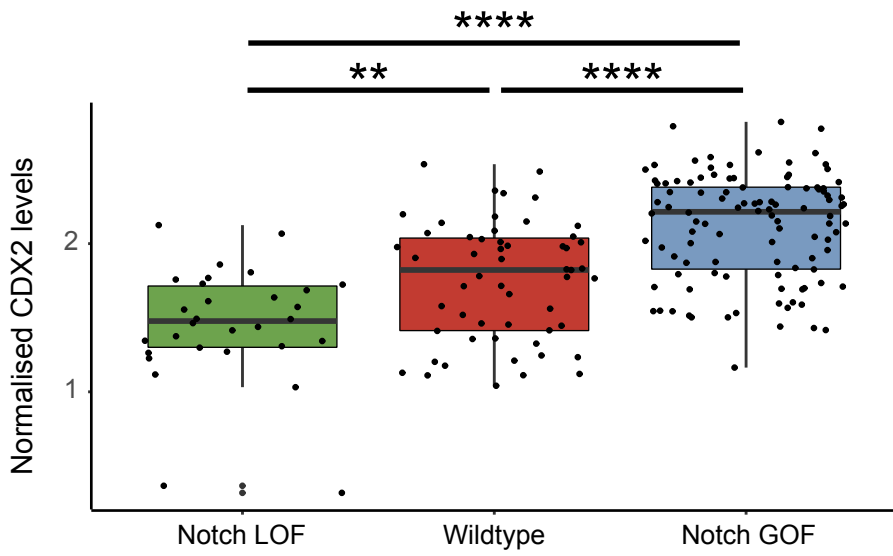

Supplement: supp [file elife-42930-supp-v1.zip › elife_poa_e42930_Figure_4_figure_supplement_1.pdf]

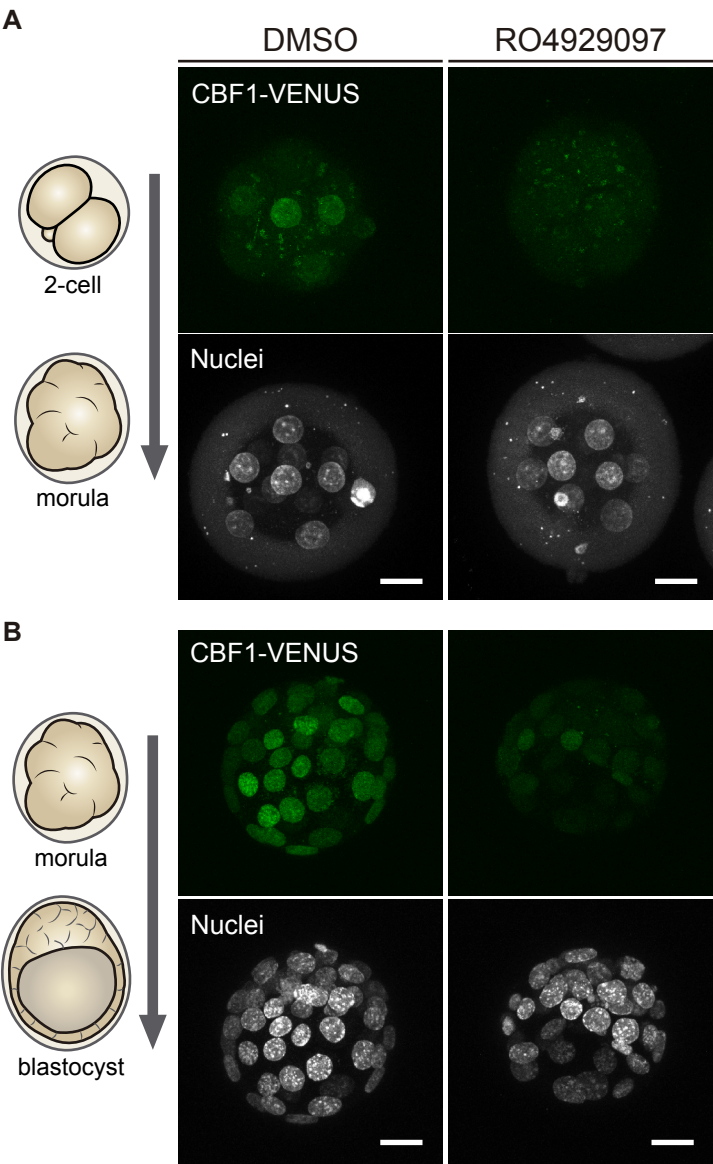

Supplement: supp [file elife-42930-supp-v1.zip › elife_poa_e42930_Figure_2_figure_supplement_1.pdf]

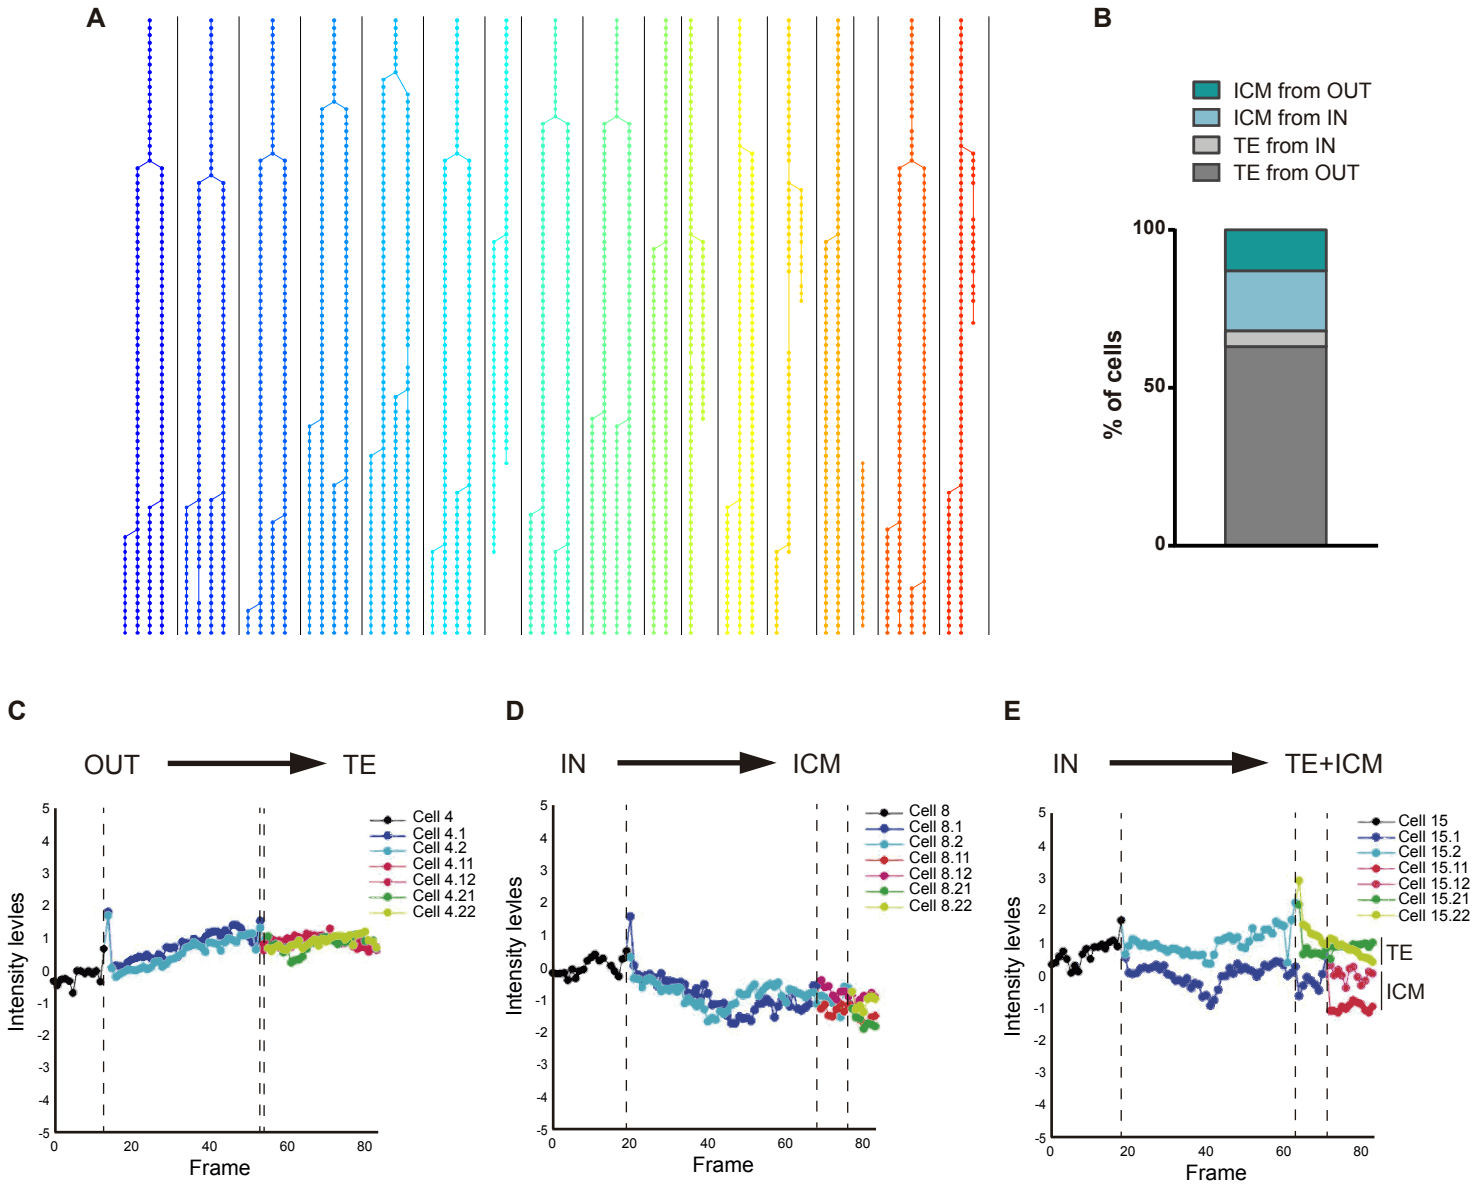

Supplement: supp [file elife-42930-supp-v1.zip › elife_poa_e42930_Figure_3_figure_supplement_2.pdf]

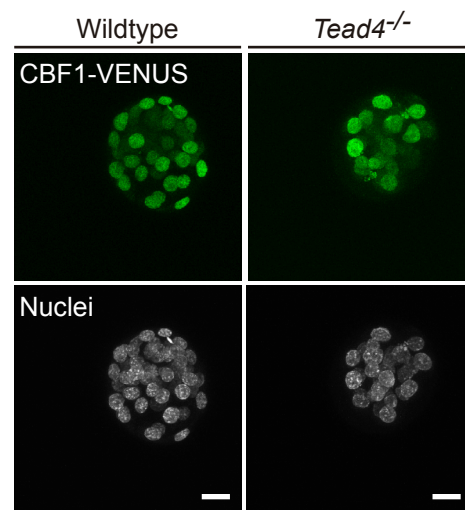

Supplement: supp [file elife-42930-supp-v1.zip › elife_poa_e42930_Figure_1_figure_supplement_4.pdf]

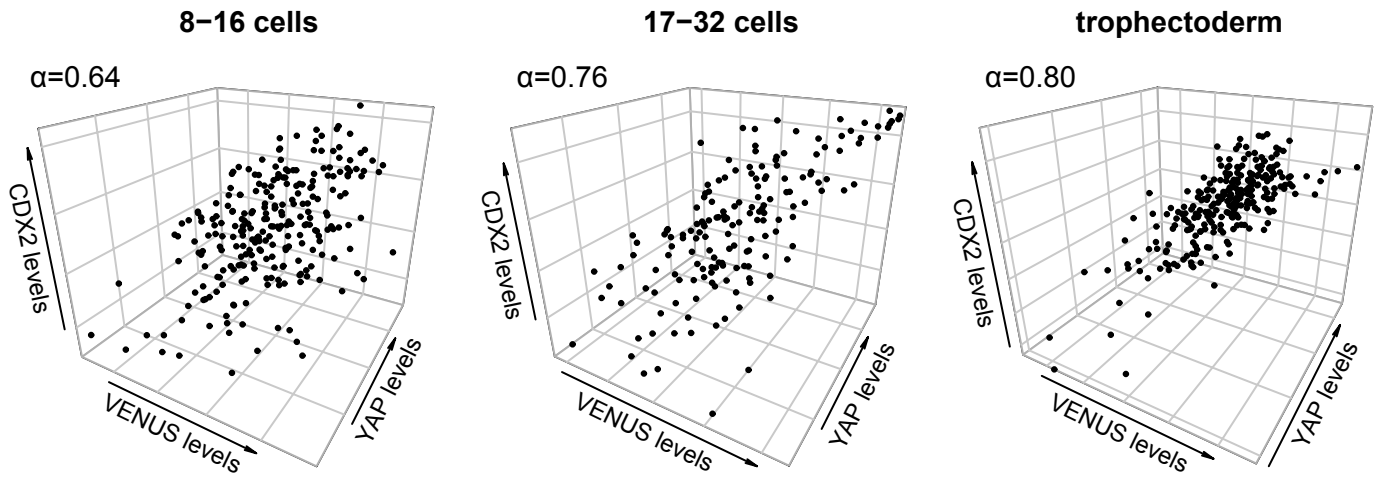

Supplement: supp [file elife-42930-supp-v1.zip › elife_poa_e42930_Figure_1_figure_supplement_2.pdf]

Menchero Figure 6-figure supplement 1

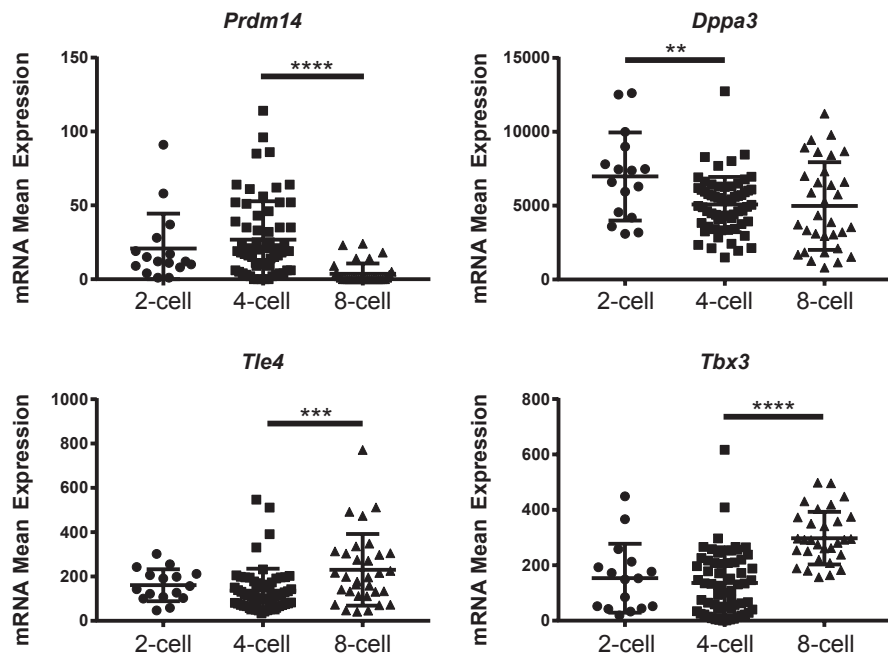

Supplement: supp [file elife-42930-supp-v1.zip › elife_poa_e42930_Figure_6_figure_supplement_1.pdf]

A

|                   |      |       |       |     |      |      |       |       |      |       |
|-------------------|------|-------|-------|-----|------|------|-------|-------|------|-------|
| <i>Rbpj</i>       | +/+  | +/+   | +/-   | +/- | +/+  | -/-  | +/-   | -/-   | -/-  | Total |
| <i>Tead4</i>      | +/+  | +/-   | +/+   | +/- | -/-  | +/+  | -/-   | +/-   | -/-  |       |
| Number of embryos | 11   | 27    | 10    | 39  | 10   | 8    | 15    | 21    | 9    | 150   |
| % of embryos      | 7.33 | 18    | 6.67  | 26  | 6.67 | 5.33 | 10    | 14    | 6    | 100   |
| expected %        | 6.25 | 12.50 | 12.50 | 25  | 6.25 | 6.25 | 12.50 | 12.50 | 6.25 | 100   |

B

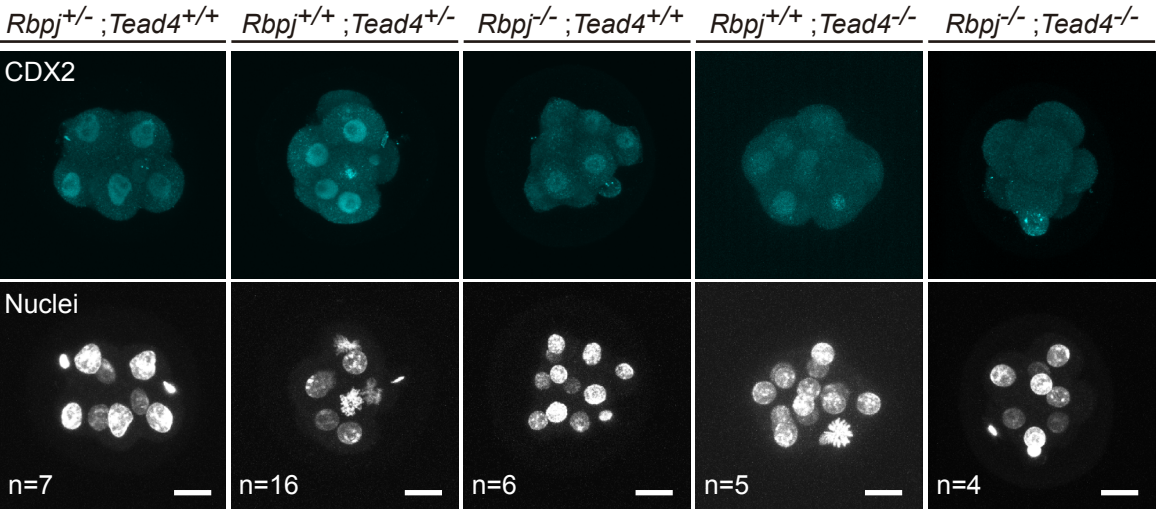

C

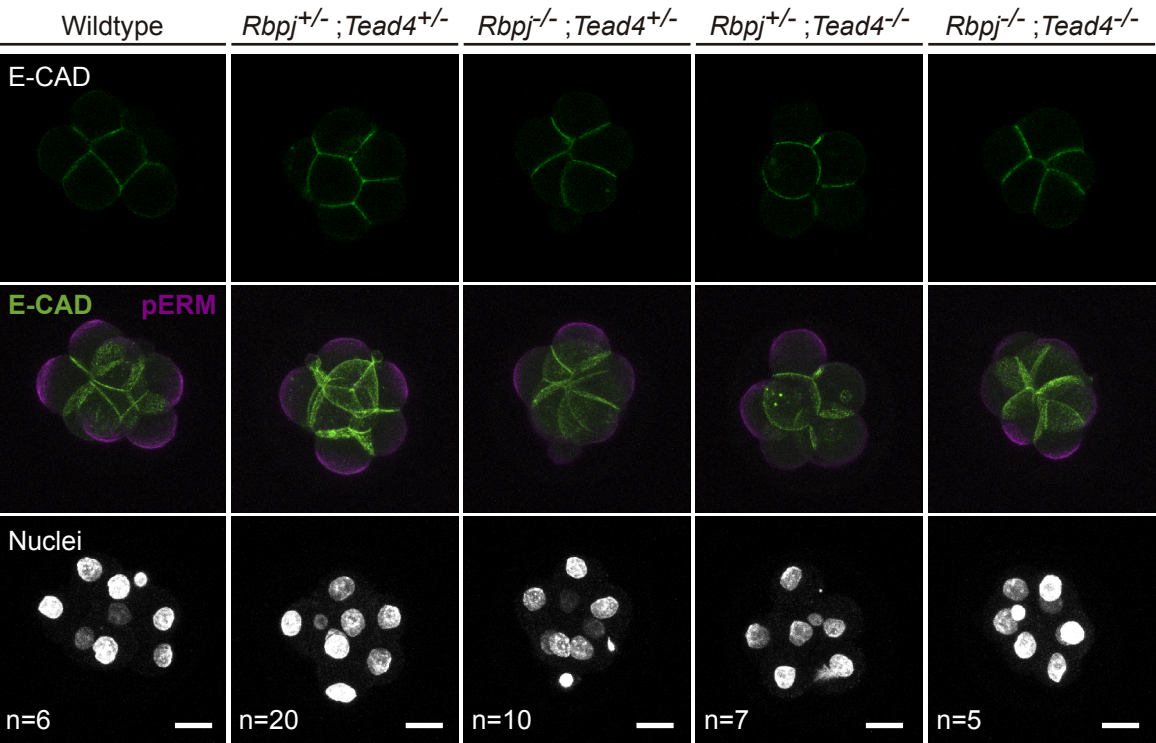

Supplement: supp [file elife-42930-supp-v1.zip › elife_poa_e42930_Figure_1_figure_supplement_1.pdf]

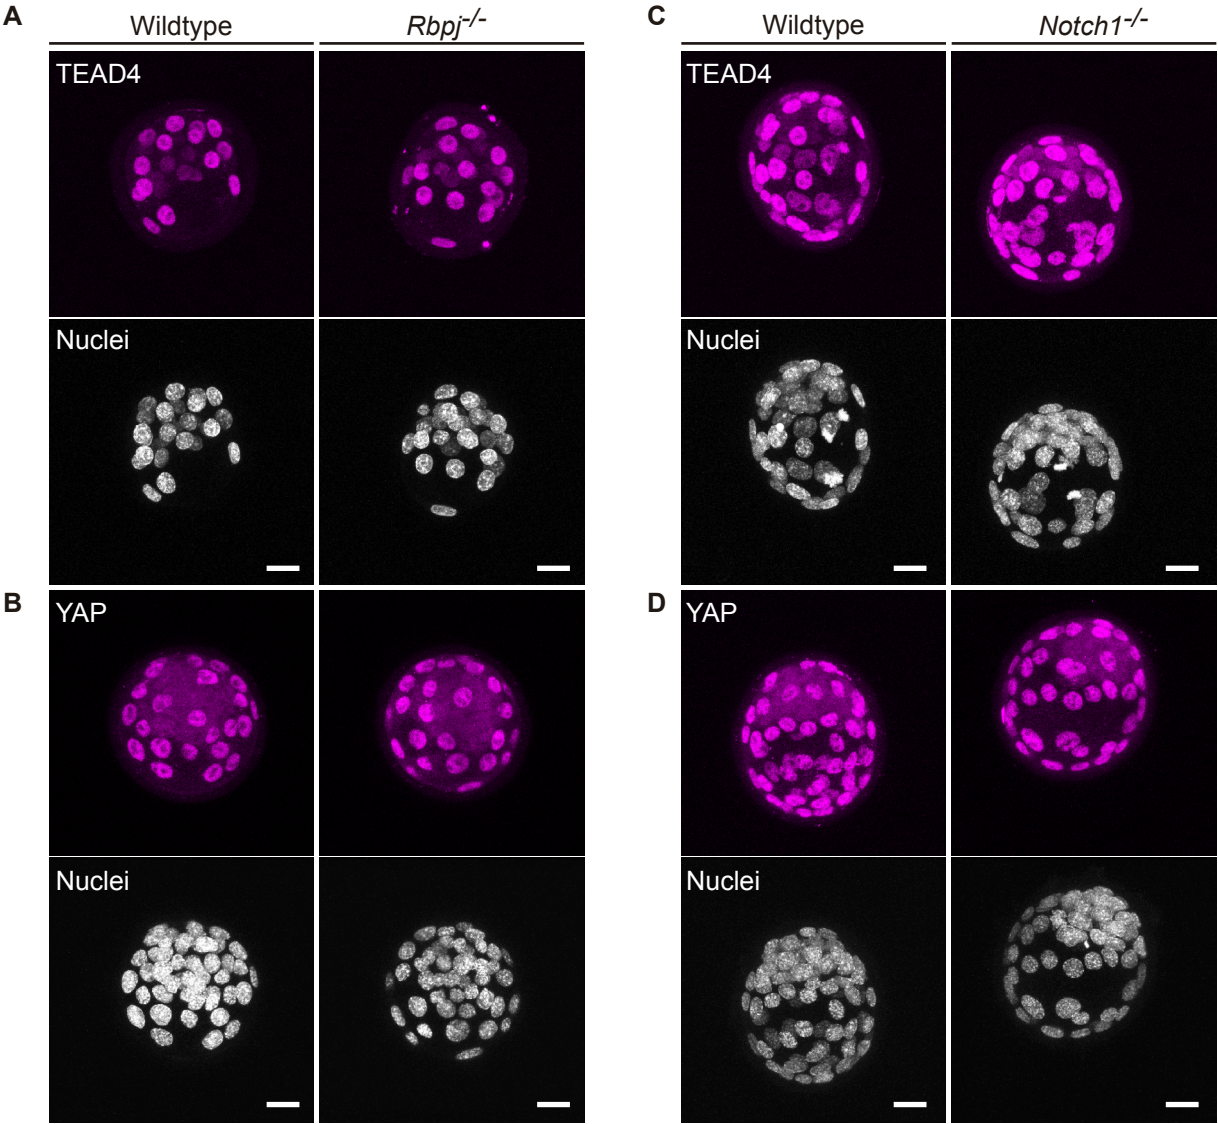

Supplement: supp [file elife-42930-supp-v1.zip › elife_poa_e42930_Figure_1_figure_supplement_3.pdf]
